# Supplementary material for: Enantioselective construction of quaternary stereocenters via organocatalytic arylation of isoxazolin-5-ones with o-quinone diimides
Source: Royal Society of Chemistry journal article supplement (doi:10.1039/d3qo01600e), 2023-01-01
Supplement: d3qo01600e1.pdf [file d3qo01600e1.pdf]

**Enantioselective construction of quaternary stereocenters via organocatalytic arylation of isoxazolin-5-ones with *o*-quinone diimides**

Ricardo Torán, Eduardo Portillo, Amparo Sanz-Marco, Carlos Vila, and Gonzalo Blay\*

## Table of Contents

|                                                                                                                        |     |
|------------------------------------------------------------------------------------------------------------------------|-----|
| Experimental Procedures                                                                                                | S3  |
| Materials and methods                                                                                                  | S3  |
| General procedure for the enantioselective arylation<br>of isoxazolin-5-ones <b>1</b> with quinone diimides <b>2</b> . | S3  |
| Characterization data for compounds <b>3</b>                                                                           | S3  |
| One mmol scale synthesis of compound <b>3aa</b>                                                                        | S13 |
| Synthetic transformations                                                                                              | S14 |
| Synthesis of compounds <b>4</b>                                                                                        | S14 |
| Synthesis of compound <b>5</b>                                                                                         | S15 |
| Synthesis of compound <b>6</b>                                                                                         | S16 |
| NMR spectra for compounds <b>3-6</b>                                                                                   | S17 |
| HPLC traces for compounds <b>3-6</b>                                                                                   | S45 |
| Determination of the relative stereochemistry of compounds <b>4</b>                                                    | S69 |
| X-Ray structure of compound <b>3ha</b>                                                                                 | S71 |
| Structural determination of compounds <b>3ad-3ag</b> .                                                                 | S72 |
| References                                                                                                             | S72 |

## Experimental Procedures

### Materials and methods

All reagents were purchased from commercial suppliers and used without further purification. All solvents employed in the reactions were distilled from appropriate drying agents prior to use. Reactions were monitored by TLC analysis using Merck Silica Gel 60 F-254 thin layer plates. Flash column chromatography was performed on Merck silica gel 60, 0.040-0.063 mm. Melting points were determined in capillary tubes. NMR spectra were run at 300 MHz for  $^1\text{H}$  and at 75 MHz for  $^{13}\text{C}$  NMR using residual nondeuterated solvent ( $\text{CHCl}_3$ ) as internal standard ( $\delta$  7.26 and 77.0 ppm, respectively). Chemical shifts are given in ppm. The carbon type was determined by DEPT experiments. High resolution mass spectra (ESI) were recorded on a Q-TOF spectrometer equipped with an electrospray source with a capillary voltage of 3.3 kV (ESI). Specific optical rotations were measured using sodium light (D line 589 nm). Chiral HPLC analyses were performed in a chromatograph equipped with a UV diode-array detector using chiral stationary phase columns from Daicel or Phenomenex. Isoxazolinones **1**<sup>[1]</sup> and quinone diimides **2**<sup>[2]</sup> were prepared according to literature procedures.

### General procedure for the enantioselective arylation of isoxazolin-5-ones **1** with quinone diimides **2**.

Isoxazolin-5-one **1** (0.11 mmol, 1.1 eq), diimide **2** (0.10 mmol, 1 eq), and squaramide **SQ-3** (6.0 mg, 0.01 mmol) were introduced in a round bottom flask. Dichloromethane (10 mL) was added, and the mixture was stirred at  $-20\text{ }^\circ\text{C}$  until completion (TLC). After this time, the reaction mixture was directly chromatographed on silica gel eluting with hexane:EtOAc mixtures to give compound **3**.

### (*R*)-*N,N'*-(4-(4-Benzyl-3-methyl-5-oxo-4,5-dihydroisoxazol-4-yl)-1,2-phenylene)dibenzamide (**3aa**)

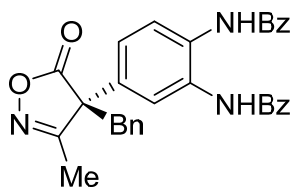

46.4 mg (92%) of **3aa** were obtained from **1a** (19.5 mg) and **2a** (31.4 mg). The enantiomeric excess (93%) was determined using chiral HPLC (Lux i-Amylose-1), hexane:*i*PrOH 80:20, 1.0 mL min<sup>-1</sup>, major enantiomer:  $t_r = 27.1$  min, minor enantiomer:  $t_r = 53.3$  min.

White solid; **m.p.** 111.2-114.0  $^\circ\text{C}$ ;  $[\alpha]_{\text{D}}^{25} -48.5$  ( $c$  0.27,  $\text{CHCl}_3$ );  $^1\text{H}$  NMR (300 MHz,  $\text{DMSO-}d_6$ )  $\delta$  10.24 (1H, s, NH), 10.14 (1H, s, NH), 8.00-7.95 (4H, m, Ar), 7.88 (1H, d,  $J = 8.7$  Hz, Ar), 7.67 (1H, d,  $J = 2.4$  Hz, Ar), 7.61-7.50 (6H, m, Ar), 7.42-7.25 (6H, m, Ar), 3.78 (1H, d,  $J = 13.5$  Hz, CH-Ph), 3.61 (1H, d,  $J = 13.5$  Hz, CH-Ph), 2.13 (3H, s, Me);  $^{13}\text{C}$  NMR (75 MHz,  $\text{DMSO-}d_6$ )  $\delta$  178.7 (C), 168.9 (C), 165.8 (C), 165.5 (C), 134.1 (C), 134.0 (C), 133.9 (C), 132.0 (C), 132.03 (C), 131.9 (CH), 131.8 (CH),

130.6 (C), 129.50 (CH), 128.63 (CH), 128.63 (CH), 128.58 (CH), 127.69 (CH), 127.68 (CH), 127.6 (CH), 126.7 (CH), 123.9 (CH), 123.6 (CH), 61.1 (C), 37.5 (CH<sub>2</sub>), 12.6 (CH<sub>3</sub>); **HRMS** (ESI)  $m/z$ : 504.1903 [M+H]<sup>+</sup>, C<sub>31</sub>H<sub>26</sub>N<sub>3</sub>O<sub>4</sub><sup>+</sup> requires 504.1918.

**(R)-N,N'-(4-(3-Methyl-4-(4-methylbenzyl)-5-oxo-4,5-dihydroisoxazol-4-yl)-1,2-phenylene)dibenzamide (3ba)**

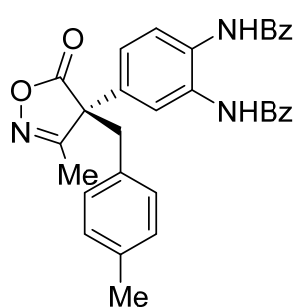

48.7 mg (94%) of **3ba** were obtained from **1b** (22.3 mg) and **2a** (31.4 mg). The enantiomeric excess (95%) was determined using chiral HPLC (Lux i-Amylose-1), hex:<sup>i</sup>PrOH 80:20, 1.5 mL min<sup>-1</sup>, major enantiomer:  $t_r$  = 13.5 min, minor enantiomer:  $t_r$  = 44.5 min.

White solid; **m.p.** 119.7-121.3°C;  $[\alpha]_D^{25}$  -55.7 (*c* 0.47, CHCl<sub>3</sub>); **<sup>1</sup>H NMR** (300 MHz, DMSO-*d*<sub>6</sub>)  $\delta$  10.22 (1H, s, NH), 10.12 (1H, s, NH), 7.99-7.94 (4H, m, Ar), 7.85 (1H, d, *J* = 8.6 Hz, Ar), 7.65-7.51 (8H, m, Ar), 7.38 (1H, dd, *J* = 8.4, 2.4 Hz, Ar), 7.17-7.11 (4H, m, Ar), 3.72 (1H, d, *J* = 13.5 Hz, CH-Ar), 3.55 (1H, d, *J* = 13.5 Hz, CH-Ar), 2.29 (3H, s, CH<sub>3</sub>), 2.11 (3H, s, CH<sub>3</sub>); **<sup>13</sup>C NMR** (75 MHz, DMSO-*d*<sub>6</sub>)  $\delta$  179.2 (C), 169.4 (C), 166.2 (C), 166.0 (C), 137.3 (C), 134.52 (C), 134.49 (C), 134.48 (CH), 134.4 (C), 132.48 (C), 132.3 (C), 131.3 (C), 131.1 (C), 129.8 (CH), 129.7 (CH), 129.1 (CH), 129.0 (CH), 128.1 (CH), 128.0 (CH), 127.1 (CH), 124.3 (CH), 61.6 (C), 37.6 (CH<sub>2</sub>), 21.1 (CH<sub>3</sub>), 13.0 (CH<sub>3</sub>); **HRMS** (ESI)  $m/z$ : 518.2063 [M+H]<sup>+</sup>, C<sub>32</sub>H<sub>28</sub>N<sub>3</sub>O<sub>4</sub><sup>+</sup> requires 518.2074.

**(R)-N,N'-(4-(4-(4-Methoxybenzyl)-3-methyl-5-oxo-4,5-dihydroisoxazol-4-yl)-1,2-phenylene)dibenzamide (3ca)**

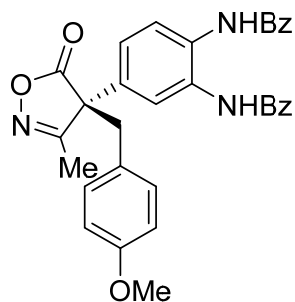

50.1 mg (95%) of **3ca** were obtained from **1c** (24.1 mg) and **2a** (31.4 mg). The enantiomeric excess (96%) was determined using chiral HPLC (Lux Cellulose-2), hex:<sup>i</sup>PrOH 75:25, 1 mL min<sup>-1</sup>, major enantiomer:  $t_r$  = 49.3 min, minor enantiomer:  $t_r$  = 42.0 min.

White solid; **m.p.** 116.0-117.0°C;  $[\alpha]_D^{25}$  -49.1 (*c* 0.54, CHCl<sub>3</sub>); **<sup>1</sup>H NMR** (300 MHz, DMSO-*d*<sub>6</sub>)  $\delta$  10.21 (1H, s, NH), 10.12 (1H, s, NH), 7.98-7.94 (4H, m, Ar), 7.85 (1H, d, *J* = 8.7 Hz, Ar), 7.64-7.51 (7H, m, Ar), 7.37 (1H, dd, *J* = 8.55, 2.4 Hz, Ar), 7.16 (2H, d, *J* = 8.7 Hz, Ar), 6.90 (2H, d, *J* = 8.7 Hz, Ar), 3.75 (3H, s, OCH<sub>3</sub>), 3.72 (1H, d, *J* = 16.2 Hz, CH-Ar), 3.53 (1H, d, *J* = 13.8 Hz, CH-Ar), 2.12 (3H, s, CH<sub>3</sub>); **<sup>13</sup>C NMR** (75 MHz, DMSO-*d*<sub>6</sub>)  $\delta$  178.8 (C), 169.0 (C), 165.8 (C), 165.5 (C), 158.7 (C), 134.1 (C), 134.0 (C), 132.0 (CH), 131.9 (C), 131.8 (C), 130.7 (C), 130.6 (CH), 128.62 (CH), 128.57 (CH), 127.7 (CH), 127.6 (CH), 126.7 (CH), 125.6 (C), 123.9 (CH), 123.6 (CH), 114.0 (CH), 61.2 (C), 55.0 (CH<sub>3</sub>), 36.8 (CH<sub>2</sub>), 12.5 (CH<sub>3</sub>); **HRMS** (ESI)  $m/z$ : 534.2009 [M+H]<sup>+</sup>, C<sub>32</sub>H<sub>28</sub>N<sub>3</sub>O<sub>5</sub><sup>+</sup> requires 534.2023.

**(R)-N,N'-(4-(4-(4-Chlorobenzyl)-3-methyl-5-oxo-4,5-dihydroisoxazol-4-yl)-1,2-phenylene)dibenzamide (3da)**

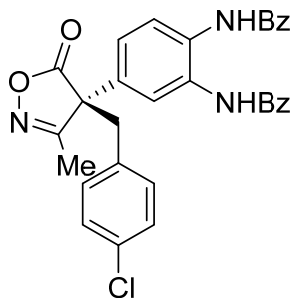

39.2 mg (74%) of **3da** were obtained from **1d** (24.5 mg) and **2a** (31.4 mg). The enantiomeric excess (93%) was determined using chiral HPLC (Lux Cellulose-2), hex:<sup>i</sup>PrOH 75:25, 1 mL min<sup>-1</sup>, major enantiomer:  $t_r = 35.7$  min, minor enantiomer:  $t_r = 27.7$  min.

White solid; **m.p.** 157.3-158.4 °C;  $[\alpha]_D^{25} -49.2$  ( $c$  0.67, CHCl<sub>3</sub>); <sup>1</sup>H NMR (300 MHz, DMSO-d<sub>6</sub>)  $\delta$  10.21 (1H, s, NH), 10.13 (1H, s, NH), 7.96 (4H, ws, Ar), 7.86 (1H, d,  $J = 8.4$  Hz, Ar) 7.65-7.53 (8H, m, Ar), 7.44-7.37 (3H, m, Ar), 7.28-7.25 (2H, m, Ar), 3.79 (1H, d,  $J = 13.2$  Hz, CH-Ar), 3.60 (1H, d,  $J = 13.2$  Hz, CH-Ar), 2.13 (3H, s, CH<sub>3</sub>); <sup>13</sup>C NMR (75 MHz, DMSO-d<sub>6</sub>)  $\delta$  178.6 (C), 168.9 (C), 165.8 (C), 165.2 (C), 134.1 (C), 133.9 (C), 133.0 (C), 132.6 (C), 132.0 (CH), 131.89 (C), 131.84 (C), 131.4 (CH), 130.3 (C), 128.7 (CH), 128.62 (CH), 128.57 (CH), 127.7 (CH), 127.6 (CH), 126.7 (CH), 124.0 (CH), 123.6 (CH), 61.0 (C), 36.6 (CH<sub>2</sub>), 12.5 (CH<sub>3</sub>); **HRMS** (ESI)  $m/z$ : 538.1513 [M+H]<sup>+</sup>, C<sub>31</sub>H<sub>25</sub>ClN<sub>3</sub>O<sub>4</sub><sup>+</sup> requires 538.1528.

**(R)-N,N'-(4-(4-(3-Methoxybenzyl)-3-methyl-5-oxo-4,5-dihydroisoxazol-4-yl)-1,2-phenylene)dibenzamide (3ea)**

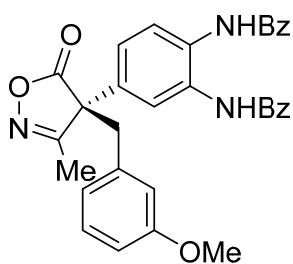

51.6 mg (97%) of **3ea** were obtained from **1g** (24.1 mg) and **2a** (31.4 mg). The enantiomeric excess (94%) was determined using chiral HPLC (Lux i-Amylose-1), hex:<sup>i</sup>PrOH 70:30, 1 mL min<sup>-1</sup>, major enantiomer:  $t_r = 15.43$  min, minor enantiomer:  $t_r = 50.00$  min.

Pink solid; **m.p.** 151.9-154.0°C;  $[\alpha]_D^{25} -48.4$  ( $c$  0.83, CHCl<sub>3</sub>); <sup>1</sup>H NMR (300 MHz, CDCl<sub>3</sub>)  $\delta$  9.71 (1H, s, NH), 9.53 (1H, s, NH), 8.08 (4H, m, Ar), 7.53 (8H, m, Ar), 7.16 (1H, dd,  $J = 8.4, 7.3$  Hz, Ar), 6.79 (1H, ddd,  $J = 8.4, 2.4, 1.0$  Hz, Ar), 6.70 (1H, dd,  $J = 8.5, 2.2$  Hz, Ar), 6.53 (2H, m, Ar), 3.74 (3H, s, CH<sub>3</sub>O), 3.33 (1H, d,  $J = 13.3$  Hz, CH-Ph), 2.97 (1H, d,  $J = 13.3$  Hz, CH-Ph), 1.66 (3H, s, CH<sub>3</sub>); <sup>13</sup>C NMR (75 MHz, CDCl<sub>3</sub>)  $\delta$  178.5 (C), 167.6 (C), 166.59 (C), 166.55 (C), 159.6 (C), 134.4 (C), 132.9 (C), 132.6 (CH), 131.7 (C), 131.5 (C), 131.4 (C), 129.8 (CH), 128.9 (CH), 127.8 (CH), 127.7 (CH), 126.9 (CH), 124.1 (CH), 123.3 (CH), 121.3 (CH), 115.0 (CH), 113.2 (CH), 60.7 (C), 55.1 (CH<sub>3</sub>), 37.9 (CH<sub>2</sub>), 12.6 (CH<sub>3</sub>); **HRMS** (ESI)  $m/z$ : 534.2027 [M+H]<sup>+</sup>, C<sub>32</sub>H<sub>27</sub>N<sub>3</sub>O<sub>5</sub><sup>+</sup> requires 534.2023.

**(R)-N,N'-(4-(4-(3-Chlorobenzyl)-3-methyl-5-oxo-4,5-dihydroisoxazol-4-yl)-1,2-phenylene)dibenzamide (3fa)**

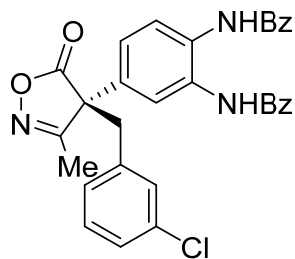

51.5 mg (96%) of **3fa** were obtained from **1f** (24.5 mg) and **2a** (31.4 mg). The enantiomeric excess (92%) was determined using chiral HPLC (Lux i-Amylose-1), hex:<sup>t</sup>PrOH 70:30, 1 mL min<sup>-1</sup>, major enantiomer: t<sub>r</sub> = 13.26 min, minor enantiomer: t<sub>r</sub> = 47.45 min.

Pink solid; **m.p.** 104.4-105.3°C; [α]<sub>D</sub><sup>25</sup> -41.1 (*c* 0.85, CHCl<sub>3</sub>); **<sup>1</sup>H NMR** (300 MHz, CDCl<sub>3</sub>) δ 9.79 (1H, s, NH), 9.58 (1H, s, NH), 8.11 (4H, ddt, *J* = 19.7, 6.0, 1.5 Hz, Ar), 7.55 (8H, m, Ar), 7.21 (2H, m, Ar), 6.82 (2H, m, Ar), 6.62 (1H, dd, *J* = 8.5, 2.2 Hz, Ar), 3.24 (1H, d, *J* = 13.3 Hz, CH-Ph), 2.89 (1H, d, *J* = 13.4 Hz, CH-Ph), 1.61 (3H, s, CH<sub>3</sub>); **<sup>13</sup>C NMR** (75 MHz, CDCl<sub>3</sub>) δ 178.0 (C), 167.3 (C), 166.7 (C), 134.8 (C), 134.5 (C), 132.8 (CH), 132.7 (C), 131.8 (C), 131.6 (C), 131.2 (C), 130.1 (CH), 129.3 (CH), 128.93 (CH), 128.90 (CH), 128.3 (CH), 127.9 (CH), 127.8 (CH), 127.3 (CH), 127.1 (CH), 124.0 (CH), 123.1 (CH), 60.5 (C), 37.3 (CH<sub>2</sub>), 12.5 (CH<sub>3</sub>); **HRMS** (ESI) *m/z*: 538.1523 [M+H]<sup>+</sup>, C<sub>31</sub>H<sub>25</sub>ClN<sub>3</sub>O<sub>4</sub><sup>+</sup> requires 538.1528..

**(R)-N,N'-(4-(4-(2-Methoxybenzyl)-3-methyl-5-oxo-4,5-dihydroisoxazol-4-yl)-1,2-phenylene)dibenzamide (3ga)**

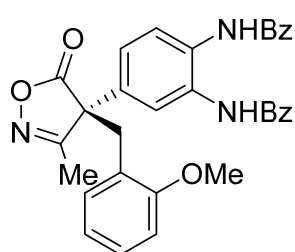

46.5 mg (88%) of **3ga** were obtained from **1g** (24.1 mg) and **2a** (31.4 mg). The enantiomeric excess (90%) was determined using chiral HPLC (Lux Cellulose-2), hex:<sup>t</sup>PrOH 75:25, 1 mL min<sup>-1</sup>, major enantiomer: t<sub>r</sub> = 43.1 min, minor enantiomer: t<sub>r</sub> = 34.9 min.

White solid; **m.p.** 216.3-217.5°C; [α]<sub>D</sub><sup>25</sup> -72.0 (*c* 1.00, CHCl<sub>3</sub>); **<sup>1</sup>H NMR** (300 MHz, DMSO-*d*<sub>6</sub>) δ 10.24 (1H, s, NH), 10.13 (1H, s, NH), 8.00-7.94 (4H, m, Ar), 7.86 (1H, d, *J* = 8.4 Hz, Ar), 7.66-7.52 (7H, m, Ar), 7.38 (1H, dd, *J* = 8.55, 2.4 Hz, Ar), 7.21 (1H, t, *J* = 7.8 Hz, Ar), 7.17 (1H, d, *J* = 7.5 Hz, Ar), 7.03 (1H, d, *J* = 7.8 Hz, Ar), 6.92 (1H, t, *J* = 7.5 Hz, Ar), 3.82 (1H, d, *J* = 13.5 Hz, CH-Ph), 3.78 (3H, s, OCH<sub>3</sub>), 3.53 (1H, d, *J* = 13.5 Hz, CH-Ph), 2.01 (3H, s, CH<sub>3</sub>); **<sup>13</sup>C NMR** (75 MHz, DMSO-*d*<sub>6</sub>) δ 178.6 (C), 169.1 (C), 165.8 (C), 165.5 (C), 157.3 (C), 134.1 (C), 133.9 (C), 132.03 (CH), 132.00 (CH), 131.8 (C), 131.7 (C), 131.5 (CH), 131.4 (C), 129.3 (CH), 128.62 (CH), 128.57 (CH), 127.7 (CH), 127.5 (CH), 126.7 (CH), 123.9 (CH), 123.6 (CH), 121.9 (C), 120.4 (CH), 60.1 (C), 54.9 (CH), 52.6 (CH<sub>2</sub>), 30.7 (CH<sub>3</sub>), 12.5 (CH<sub>3</sub>); **HRMS** (ESI) *m/z*: 534.2027 [M+H]<sup>+</sup>, C<sub>32</sub>H<sub>27</sub>N<sub>3</sub>O<sub>5</sub><sup>+</sup> requires 534.2023.

**(R)-N,N'-(4-(4-(2-Chlorobenzyl)-3-methyl-5-oxo-4,5-dihydroisoxazol-4-yl)-1,2-phenylene)dibenzamide (3ha)**

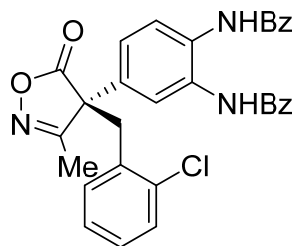

51.1 mg (95%) of **3ha** were obtained from **1h** (24.5 mg) and **2a** (31.4 mg). The enantiomeric excess (93%) was determined using chiral HPLC (Lux i-Amylose-1), hex:<sup>i</sup>PrOH 80:20, 1 mL min<sup>-1</sup>, major enantiomer:  $t_r = 19.87$  min, minor enantiomer:  $t_r = 41.84$  min.

White solid; **m.p.** 174.0-175.5°C;  $[\alpha]_D^{25} -69.9$  ( $c$  0.89, CHCl<sub>3</sub>); **<sup>1</sup>H NMR** (300 MHz, CDCl<sub>3</sub>)  $\delta$  9.58 (1H, s, NH), 9.45 (1H, s, NH), 8.04 (4H, m, Ar), 7.52 (8H, m, Ar), 7.34 (1H, m, Ar), 7.17 (2H, m, Ar), 7.05 (1H, dd,  $J = 7.3, 2.1$  Hz, Ar), 6.84 (1H, dd,  $J = 8.6, 2.2$  Hz, Ar), 3.64 (1H, d,  $J = 14.0$  Hz, CH-Ph), 3.34 (1H, d,  $J = 14.1$  Hz, CH-Ph), 1.83 (3H, s, CH<sub>3</sub>); **<sup>13</sup>C NMR** (75 MHz, CDCl<sub>3</sub>)  $\delta$  178.7 (C), 168.0 (C), 166.69 (C), 166.65 (C), 134.0 (C), 133.02 (C), 132.96 (C), 132.5 (CH), 131.8 (C), 131.7 (C), 131.5 (C), 131.2 (C), 130.6 (CH), 130.0 (CH), 129.3 (CH), 128.8 (CH), 127.8 (CH), 127.7 (CH), 127.4 (CH), 126.8 (CH), 124.0 (CH), 123.4 (CH), 60.1 (C), 34.7 (CH<sub>2</sub>), 13.0 (CH<sub>3</sub>); **HRMS** (ESI)  $m/z$ : 538.1525 [M+H]<sup>+</sup>, C<sub>31</sub>H<sub>25</sub>ClN<sub>3</sub>O<sub>4</sub><sup>+</sup> requires 538.1528.

**(R)-N,N'-(4-(4-Benzyl-5-oxo-3-phenyl-4,5-dihydroisoxazol-4-yl)-1,2-phenylene)dibenzamide (3ia)**

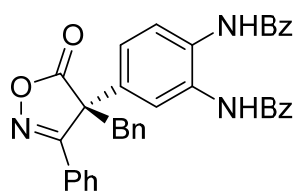

46.7 mg (83%) of **3ia** were obtained from **1i** (27.6 mg) and **2a** (31.4 mg). The enantiomeric excess (89%) was measured by chiral HPLC (Lux i-Amylose-1), hex:<sup>i</sup>PrOH 85:15, 1 mL min<sup>-1</sup>, major enantiomer:  $t_r = 22.85$  min, minor enantiomer:  $t_r = 28.20$  min.

White solid; **m.p.** 151.4-152.3 °C;  $[\alpha]_D^{25} -29.2$  ( $c$  0.94, CHCl<sub>3</sub>); **<sup>1</sup>H NMR** (300 MHz, DMSO-d<sub>6</sub>)  $\delta$  10.23 (1H, s, NH), 10.11 (1H, s, NH). 7.97-7.93 (4H, m, Ar), 7.88 (1H, d,  $J = 9$  Hz, Ar), 7.80 (1H, d,  $J = 3$  Hz, Ar), 7.60-7.46 (12H, m, Ar), 7.26-7.18 (3H, m, Ar), 6.85-6.82 (2H, m, Ar), 3.92 (2H, ws, CH<sub>2</sub>-Ph); **<sup>13</sup>C NMR** (75 MHz, DMSO-d<sub>6</sub>)  $\delta$  178.6 (C), 166.8 (C), 165.8 (C), 165.5 (C), 134.1 (C), 133.9 (C), 133.6 (C), 132.2 (CH), 132.1 (C), 132.02 (CH), 131.98 (CH), 131.2 (C), 129.5 (CH), 129.3 (CH), 128.6 (CH), 128.5 (CH), 127.8 (CH), 127.7 (CH), 127.5 (CH), 127.1 (CH), 127.0 (CH), 126.9 (C), 123.42 (CH), 123.35 (CH), 59.8 (C), 38.2 (CH<sub>2</sub>); **HRMS** (ESI)  $m/z$ : 566.2082 [M+H]<sup>+</sup>, C<sub>36</sub>H<sub>28</sub>N<sub>3</sub>O<sub>4</sub><sup>+</sup> requires 566.2074.

**(R)-N,N'-(4-(4-Benzyl-3-cyclopropyl-5-oxo-4,5-dihydroisoxazol-4-yl)-1,2-phenylene)dibenzamide (3ja)**

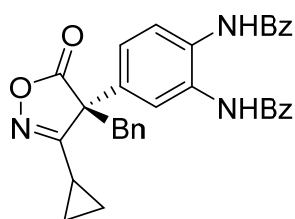

43.5 mg (82%) of **3ja** were obtained from **1j** (23.6 mg) and **2a** (31.4 mg). The enantiomeric excess (91%) was measured by chiral HPLC (Lux i-Amylose-1), hex:<sup>i</sup>PrOH 80:20, 1 mL min<sup>-1</sup>, major enantiomer: t<sub>r</sub> = 19.0 min, minor enantiomer: t<sub>r</sub> = 53.5 min.

Yellow oil; [α]<sub>D</sub><sup>25</sup> -17.5 (c 0.87, CHCl<sub>3</sub>); <sup>1</sup>H NMR (300 MHz, CDCl<sub>3</sub>) δ 9.78 (1H, s, NH), 9.59 (1H, s, NH), 8.11 (4H, ddt, J = 13.0, 6.8, 1.6 Hz, Ar), 7.70 (1H, d, J = 2.3 Hz), 7.53 (7H, m, Ar), 7.24 (3H, dd, J = 6.6, 2.9 Hz, Ar), 7.03 (2H, m, Ar), 6.81 (1H, dd, J = 8.5, 2.2 Hz, Ar), 3.37 (1H, d, J = 13.3 Hz, CH-Ph), 3.10 (1H, d, J = 13.2 Hz, CH-Ph), 0.79 (5H, m); <sup>13</sup>C NMR (75 MHz, CDCl<sub>3</sub>) δ 178.6 (C), 173.0 (C), 166.6 (C), 166.5 (C), 133.09 (C), 132.97 (C), 132.94 (C) 132.6 (CH), 132.5 (CH), 132.2 (C), 131.7 (C), 131.4 (C), 129.6 (CH), 128.9 (CH), 128.5 (CH), 127.9 (CH), 127.8 (CH), 127.7 (CH), 126.6 (CH), 124.4 (CH), 123.5 (CH), 39.0 (CH<sub>3</sub>), 11.8 (CH<sub>2</sub>), 11.0 (CH<sub>2</sub>), 8.3 (CH); HRMS (ESI) m/z: 530.2077 [M+H]<sup>+</sup>, C<sub>33</sub>H<sub>28</sub>N<sub>3</sub>O<sub>4</sub><sup>+</sup> requires 530.2074.

**(R)-N,N'-(4-(3,4-Dimethyl-5-oxo-4,5-dihydroisoxazol-4-yl)-1,2-phenylene)dibenzamide (3ka)**

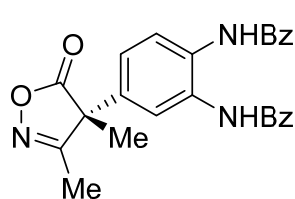

15.3 mg (37%) of **3ka** were obtained from **1k** (12.4 mg) and **2a** (31.4 mg). The enantiomeric excess (71%) was determined using chiral HPLC (Lux i-Amylose-1), hex:<sup>i</sup>PrOH 80:20, 1 mL min<sup>-1</sup>, major enantiomer: t<sub>r</sub> = 19.6 min, minor enantiomer: t<sub>r</sub> = 28.6 min.

Pink solid; m.p. 223.2-223.5 °C; [α]<sub>D</sub><sup>25</sup> -70.1 (c 0.40, CHCl<sub>3</sub>); <sup>1</sup>H NMR (300 MHz, DMSO-d<sub>6</sub>) δ 10.21 (1H, s, NH), 10.09 (1H, s, NH), 7.95 (4H, m, Ar), 7.81 (1H, d, J = 8.5 Hz, Ar), 7.55 (7H, m, Ar), 7.23 (1H, J = 8.5, 2.3 Hz, Ar), 2.01 (3H, s, CH<sub>3</sub>), 1.78 (3H, s, CH<sub>3</sub>); <sup>13</sup>C NMR (75 MHz, DMSO-d<sub>6</sub>) δ 179.6 (C), 170.6 (C), 165.8 (C), 165.5 (C), 134.1 (C), 133.9 (C), 132.0 (CH), 131.9 (CH), 131.8 (C), 131.7 (C), 130.9 (C), 128.6 (CH), 128.5 (CH), 127.7 (CH), 127.5 (CH), 126.7 (CH), 123.4 (CH), 123.2 (CH), 53.8 (C), 18.0 (CH<sub>3</sub>), 11.7 (CH<sub>3</sub>); HRMS (ESI) m/z: 428.1609 [M+H]<sup>+</sup>, C<sub>25</sub>H<sub>23</sub>N<sub>3</sub>O<sub>4</sub><sup>+</sup> requires 428.1605.

**(R)-N,N'-(4-(4-Methyl-5-oxo-3-phenyl-4,5-dihydroisoxazol-4-yl)-1,2-phenylene)dibenzamide (3la)**

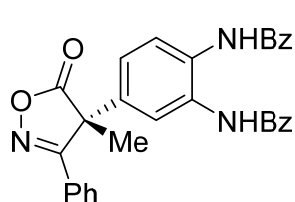

45.6 mg (93%) of **3la** were obtained from from **1l** (19.2 mg) and **2a** (31.4 mg). The enantiomeric excess (80%) was measured by chiral HPLC (Chiralpak ADH), hex:<sup>i</sup>PrOH 80:20, 1 mL min<sup>-1</sup>, major enantiomer: t<sub>r</sub> = 20.9 min, minor enantiomer: t<sub>r</sub> = 15.7 min.

White solid; m.p. 116.2-117.6 °C; [α]<sub>D</sub><sup>25</sup> -19.1 (c 0.96, CHCl<sub>3</sub>); <sup>1</sup>H NMR (300 MHz, CDCl<sub>3</sub>) δ 9.45 (1H, s, NH), 9.43 (1H, s, NH), 7.98 (4H, m, Ar), 7.50 (11H, m, Ar), 7.22 (2H, m, Ar), 6.93 (1H, dd, J = 8.5, 2.2 Hz, Ar), 1.75 (3H, s, CH<sub>3</sub>); <sup>13</sup>C NMR (75 MHz, CDCl<sub>3</sub>) δ 179.1 (C), 168.4 (C), 166.7 (C), 166.6 (C),



133.3 (C), 133.1 (C), 132.4 (C), 132.34 (CH), 132.28 (CH), 131.8 (C), 131.7 (CH), 131.6 (C), 129.0 (CH), 128.7 (CH), 127.7 (CH), 127.6 (CH), 127.2 (CH), 126.8 (CH), 126.4 (C), 124.0 (CH), 122.9 (CH), 52.8 (C), 19.9 (CH<sub>3</sub>); **HRMS** (ESI)  $m/z$ : 490.1769 [M+H]<sup>+</sup>, C<sub>30</sub>H<sub>24</sub>N<sub>3</sub>O<sub>4</sub><sup>+</sup> requires 490.1761.

**(R)-N,N'-(4-(4-Benzyl-3-methyl-5-oxo-4,5-dihydroisoxazol-4-yl)-1,2-phenylene)bis(4-chlorobenzamide) (3ab)**

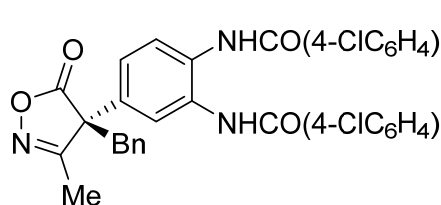

50.4 mg (89%) of **3ab** were obtained from **1a** (19.5 mg) and **2b** (38.3 mg). The enantiomeric excess (95%) was measured by chiral HPLC (Chiralpak IC), hex:<sup>i</sup>PrOH 80:20, 1 mL min<sup>-1</sup>, major enantiomer:  $t_r$  = 24.3 min, minor enantiomer:  $t_r$  = 53.1 min.

White solid; **m.p.** 232.6-233.4 °C; [ $\alpha$ ]<sub>D</sub><sup>25</sup> -52.3 (*c* 0.47, CHCl<sub>3</sub>); **<sup>1</sup>H NMR** (300 MHz, DMSO-*d*<sub>6</sub>)  $\delta$  10.23 (1H, s, NH), 10.14 (1H, s, NH), 8.00-7.95 (4H, m, Ar), 7.84 (1H, d, *J* = 6 Hz, Ar), 7.62 (1H, d, *J* = 9 Hz, Ar), 7.41-7.30 (4H, m, Ar), 7.26-7.23 (2H, m, Ar), 3.78 (1H, d, *J* = 15 Hz, CH-Ph), 3.59 (1H, d, *J* = 12 Hz, CH-Ph), 2.12 (3H, s, CH<sub>3</sub>); **<sup>13</sup>C NMR** (75 MHz, DMSO-*d*<sub>6</sub>)  $\delta$  178.7 (C), 168.9 (C), 164.7 (C), 164.6 (C), 136.8 (C), 136.7 (C), 133.9 (C), 133.0 (C), 132.9 (C), 131.8 (C), 130.7 (C), 129.7 (CH), 129.6 (CH), 129.5 (CH), 128.64 (CH), 128.60 (CH), 127.7 (CH), 126.9 (CH), 124.1 (CH), 123.7 (CH), 61.1 (C), 37.4 (CH<sub>2</sub>), 12.6 (CH<sub>3</sub>); **HRMS** (ESI)  $m/z$ : 572.1141 [M+H]<sup>+</sup>, C<sub>31</sub>H<sub>24</sub>Cl<sub>2</sub>N<sub>3</sub>O<sub>4</sub><sup>+</sup> requires 572.1138.

**(R)-N,N'-(4-(4-Benzyl-3-methyl-5-oxo-4,5-dihydroisoxazol-4-yl)-1,2-phenylene)bis(4-methoxybenzamide) (3ac)**

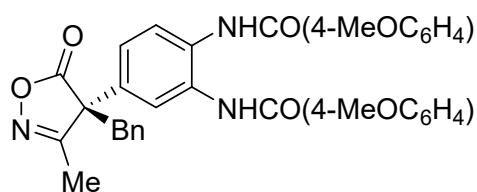

26.3 mg (47%) of **3ac** were obtained from **1a** (19.5 mg) and **2c** (37.4 mg). Enantiomeric excess could not be determined.

Yellow oil; [ $\alpha$ ]<sub>D</sub><sup>25</sup> -33.0 (*c* 0.88, CHCl<sub>3</sub>); **<sup>1</sup>H NMR** (300 MHz, CDCl<sub>3</sub>)  $\delta$  9.78 (1H, s, NH), 9.56 (1H, s, NH), 8.15 (2H, d, *J* = 8.9 Hz, Ar), 8.05 (2H, d, *J* = 8.9 Hz, Ar), 7.51 (1H, d, *J* = 8.5 Hz, Ar), 7.46 (1H, d, *J* = 2.3 Hz, Ar), 7.24 (3H, dd, *J* = 5.0, 1.9 Hz, Ar), 7.06-6.93 (4H, m, Ar), 6.91-6.81 (2H, m, Ar), 7.84 (1H, d, *J* = 8.5, 2.3 Hz, Ar), 3.82 (3H, s, CH<sub>3</sub>O), 3.80 (3H, s, CH<sub>3</sub>O), 3.22 (1H, d, *J* = 13.3 Hz, CH-Ph), 2.80 (1H, d, *J* = 13.3 Hz, CH-Ph), 1.55 (3H, s, CH<sub>3</sub>); **<sup>13</sup>C NMR** (75 MHz, CDCl<sub>3</sub>)  $\delta$  178.2 (C), 167.6 (C), 166.2 (C), 163.1 (C), 132.9 (C), 131.9 (C), 131.7 (C), 131.2 (C), 130.1 (CH), 129.8 (CH), 129.7 (CH), 129.2 (CH+C), 128.8 (CH), 128.7 (CH+C), 127.9 (93), 127.1 (CH), 125.0 (C), 124.0 (CH), 123.1 (CH), 114.1 (CH), 114.0 (CH), 60.7 (C), 55.44 (CH<sub>3</sub>), 55.40 (CH<sub>3</sub>), 37.7 (CH<sub>2</sub>), 12.4 (CH<sub>3</sub>); **HRMS** (ESI)  $m/z$ : 564.2129 [M+H]<sup>+</sup>, C<sub>33</sub>H<sub>30</sub>N<sub>3</sub>O<sub>6</sub><sup>+</sup> requires 564.2129.

**(R)-N,N'-(5-(4-Benzyl-3-methyl-5-oxo-4,5-dihydroisoxazol-4-yl)-3-methyl-1,2-phenylene)dibenzamide (3ad)**

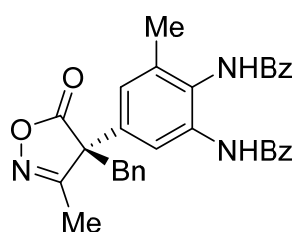

40.0 mg (78%) of **3ad** were obtained from **1a** (19.5 mg) and **2d** (32.8 mg). The enantiomeric excess (93%) was determined using HPLC (Chiralpak IC), hex:<sup>i</sup>PrOH 80:20, 1 mL min<sup>-1</sup>, major enantiomer: *t<sub>r</sub>* = 15.1 min, minor enantiomer: *t<sub>r</sub>* = 27.1 min.

White solid; **m.p.** 131.0-133.2 °C; [ $\alpha$ ]<sub>D</sub><sup>25</sup> -86.7 (*c* 0.47, CHCl<sub>3</sub>); <sup>1</sup>H NMR (300 MHz, DMSO-*d*<sub>6</sub>)  $\delta$  10.02 (1H, s, NH), 9.84 (1H, s, NH), 8.00 (2H, d, *J* = 6.9 Hz, Ar), 7.90 (2H, d, *J* = 6.9 Hz, Ar), 7.61-7.47 (7H, m, Ar), 7.37-7.26 (6H, m, Ar), 3.80 (1H, d, *J* = 13.5 Hz, CH-Ph), 3.63 (1H, d, *J* = 13.5 Hz, CH-Ph), 2.37 (3H, s, CH<sub>3</sub>), 2.14 (3H, s, CH<sub>3</sub>); <sup>13</sup>C NMR (75 MHz, DMSO-*d*<sub>6</sub>)  $\delta$  178.7 (C), 168.9 (C), 165.6 (C), 165.3 (C), 137.9 (C), 135.2 (C), 134.2 (C), 134.01 (C), 133.96 (C), 131.9 (CH), 131.8 (CH), 130.5 (C), 129.5 (CH), 128.7 (CH), 128.6 (CH), 128.5 (CH), 127.7 (CH), 127.6 (CH), 127.5 (CH), 125.0 (CH), 120.7 (CH), 61.2 (C), 37.4 (CH<sub>2</sub>), 18.6 (CH<sub>3</sub>), 12.6 (CH<sub>3</sub>); **HRMS** (ESI) *m/z*: 518.2090 [M+H]<sup>+</sup>, C<sub>32</sub>H<sub>28</sub>N<sub>3</sub>O<sub>4</sub><sup>+</sup> requires 518.2074.

**(R)-N,N'-(5-(4-Benzyl-3-methyl-5-oxo-4,5-dihydroisoxazol-4-yl)-3-methyl-1,2-phenylene)bis(4-chlorobenzamide) (3ae)**

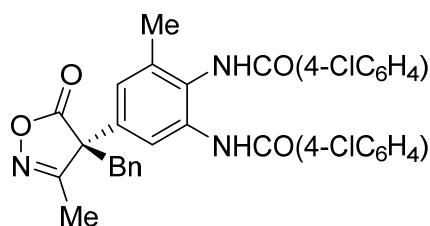

50.0 mg (85%) of **3ae** were obtained from **1ae** (12.4 mg) and **3e** (31.4 mg). The enantiomeric excess (95%) was measured by chiral HPLC (Lux i-Celulose-5), hex:<sup>i</sup>PrOH 80:20, 1 mL min<sup>-1</sup>, major enantiomer: *t<sub>r</sub>* = 21.5 min, minor enantiomer: *t<sub>r</sub>* = 42.1 min.

White solid; **m.p.** 242.0-242.4 °C [ $\alpha$ ]<sub>D</sub><sup>25</sup> -49.9 (*c* 0.85, CHCl<sub>3</sub>); <sup>1</sup>H NMR (500 MHz, DMSO-*d*<sub>6</sub>) 10.08 (1H, s, NH), 9.87 (1H, s, NH), 8.31 (1H, s, Ar), 7.98 (2H, d, *J* = 8.5 Hz Ar), 7.90 (2H, d, *J* = 8.5 Hz Ar), 7.60 (2H, d, *J* = 8.6 Hz Ar), 7.56 (2H, d, *J* = 8.6 Hz Ar), 7.53 (1H, s, Ar), 7.38-7.30 (3H, m, Ar), 7.30 (1H, unresolved d, Ar), 7.25 (2H, d, *J* = 6.5 Hz Ar), 3.77 (1H, d, *J* = 13.5 Hz, CH<sub>2</sub>-Ph), 3.61 (1H, *J* = 13.5 Hz, CH<sub>2</sub>-Ph), 2.32 (3H, s, CH<sub>3</sub>), 2.12 (3H, s, CH<sub>3</sub>); <sup>13</sup>C NMR (75 MHz, DMSO-*d*<sub>6</sub>)  $\delta$  178.7 (C), 168.9 (C), 164.7 (C), 164.2 (C), 137.9 (C), 136.7 (C), 136.6 (C), 135.2 (C), 134.0 (C), 133.0 (C), 132.9 (C), 131.9 (C), 130.6 (C), 129.6 (CH), 129.5 (CH), 128.7 (CH), 128.59 (CH), 128.55 (CH), 127.7 (CH), 125.1 (CH), 121.0 (CH), 61.1 (C), 37.4 (CH<sub>2</sub>), 18.6 (CH<sub>3</sub>), 12.6 (CH<sub>3</sub>); **HRMS** (ESI) *m/z*: 586.1294 [M+H]<sup>+</sup>, C<sub>32</sub>H<sub>26</sub>Cl<sub>2</sub>N<sub>3</sub>O<sub>4</sub><sup>+</sup> requires 586.1295.

**(R)-N,N'-(5-(4-Benzyl-3-methyl-5-oxo-4,5-dihydroisoxazol-4-yl)-3-chloro-1,2-phenylene)dibenzamide (3af) and (R)-N,N'-(4-(4-Benzyl-3-methyl-5-oxo-4,5-dihydroisoxazol-4-yl)-3-chloro-1,2-phenylene)dibenzamide (3'af)**

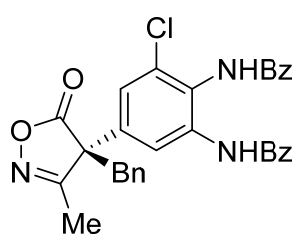

31.7 mg (62%) of **3af** and 10.8 mg (18%) of **3'af** were obtained from **1a** (19.5 mg) and **2f** (34.8 mg).

The enantiomeric excess (90%) of **3af** was determined using chiral HPLC (Chiralpak IC), hex:<sup>i</sup>PrOH 80:20, 1.5 mL min<sup>-1</sup>, major enantiomer: t<sub>r</sub> = 8.4 min, minor enantiomer: t<sub>r</sub> = 14.3 min.

White solid; **m.p.** 215.3-216.1 °C; [α]<sub>D</sub><sup>25</sup> -75.7 (c 0.47, CHCl<sub>3</sub>); <sup>1</sup>H NMR (300 MHz, DMSO-d<sub>6</sub>) δ 10.10 (1H, s, NH), 10.05 (1H, s, NH), 8.00-7.97 (2H, m, Ar), 7.88-7.86 (2H, m, Ar), 7.74 (1H, d, J = 3.0 Hz, Ar), 7.65 (1H, d, J = 3.0 Hz, Ar), 7.61-7.46 (6H, m, Ar), 7.36-7.31 (3H, m, Ar), 7.26-7.24 (2H, m, Ar), 3.84 (1H, d, J = 15 Hz, CH-Ph), 3.7 (1H, d, J = 12 Hz), 2.17 (3H, s, CH<sub>3</sub>); <sup>13</sup>C NMR (75 MHz, DMSO-d<sub>6</sub>) δ 178.3 (C), 168.5 (C), 165.8 (C), 165.4 (C), 137.3 (C), 134.0 (C), 133.74 (C), 133.68 (C), 133.6 (C), 133.2 (C), 132.04 (CH), 132.01 (CH), 129.5 (CH), 129.3 (C), 128.6 (CH), 128.53 (CH), 128.50 (CH), 127.8 (CH), 127.7 (CH), 124.0 (CH), 121.8 (CH), 61.1 (CH), 37.3 (CH<sub>2</sub>), 12.6 (CH<sub>3</sub>); **HRMS** (ESI) *m/z*: 538.1519 [M+H]<sup>+</sup>, C<sub>31</sub>H<sub>25</sub>ClN<sub>3</sub>O<sub>4</sub><sup>+</sup> requires 538.1528.

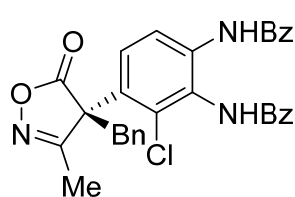

The enantiomeric excess (>99%) of **3'af** was determined using chiral HPLC (Chiralpak IC), hex:<sup>i</sup>Pr 80:20, 1.5 mL min<sup>-1</sup>, major enantiomer: t<sub>r</sub> = 58.47 min, minor enantiomer: t<sub>r</sub> = 33.63 min.

Yellow oil; [α]<sub>D</sub><sup>25</sup> +5.5 (c 0.43, CHCl<sub>3</sub>); <sup>1</sup>H NMR (300 MHz, DMSO-d<sub>6</sub>) δ 10.10 (1H, s, NH), 10.00 (1H, s, NH), 8.09 (1H, d, J = 9.0 Hz, Ar), 8.00-7.97 (2H, m, Ar), 7.94 (1H, d, J = 9.0 Hz), 7.88-7.85 (2H, m, Ar), 7.59-7.47 (6H, m, Ar), 7.36-7.33 (3H, m, Ar), 7.21-7.18 (2H, m, Ar), 3.94 (1H, d, J = 12 Hz, CH-Ph), 3.53 (1H, d, J = 12 Hz, CH-Ph), 2.01 (3H, s, CH<sub>3</sub>); <sup>13</sup>C NMR (75 MHz, DMSO-d<sub>6</sub>) δ 177.9 (C), 166.3 (C), 165.7 (C), 165.4 (C), 137.5 (C), 134.1 (C), 133.5 (C), 132.7 (C), 132.5 (C), 132.0 (CH), 122.0 (C), 130.1 (CH), 129.4 (C), 128.6 (CH), 128.5 (CH), 128.3 (CH), 128.2 (CH), 127.9 (CH), 127.8 (CH), 127.6 (CH), 123.5 (CH), 60.6 (C), 39.3 (CH<sub>2</sub>), 12.2 (CH<sub>3</sub>)

**(R)-N,N'-(5-(4-benzyl-3-methyl-5-oxo-4,5-dihydroisoxazol-4-yl)-3-fluoro-1,2-phenylene)dibenzamide (3ag)**

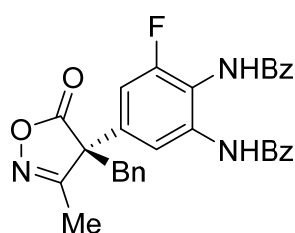

28.1 mg (54%) of **3ag** were obtained from from **1a** (19.5 mg) and **2g** (33.2 mg). The enantiomeric excess (97%) was determined using HPLC (Chiralpak IC), hex:<sup>i</sup>PrOH 80:20, 1 mL min<sup>-1</sup>, major enantiomer: t<sub>r</sub> = 16.4 min, minor enantiomer: t<sub>r</sub> = 25.5 min.

Yellow oil;  $[\alpha]_D^{25}$  -60.8 (*c* 0.26, CHCl<sub>3</sub>); <sup>1</sup>H NMR (400 MHz, CDCl<sub>3</sub>) δ 9.84 (1H, s, NH), 8.40 (1H, s, NH), 7.99 (4H, dt, *J* = 8.6 Hz, *J* = 1.5 Hz, Ar), 7.86 (1H, t, *J*<sub>H-F</sub> = 1.8 Hz, *J*<sub>H-H</sub> = 1.8 Hz, Ar), 7.64-7.46 (7H, m, Ar), 7.32-7.27 (3H, m, Ar), 7.14-7.09 (2H, m, Ar), 6.91 (1H, dd, *J*<sub>H-F</sub> = 10.7 Hz, *J*<sub>H-H</sub> = 2.2 Hz, Ar), 3.61 (1H, d, *J* = 13.4 Hz, CH-Ph), 3.32 (1H, d, *J* = 13.4 Hz, CH-Ph), 2.05 (3H, s, CH<sub>3</sub>); <sup>13</sup>C NMR (75 MHz, CDCl<sub>3</sub>) δ 178.1 (C), 167.3 (C), 167.1 (C), 165.9 (C), 170.4 (C, d, *J*<sub>C-F</sub> = 265 Hz), 154.9 (C), 134.8 (C), 134.7 (C), 133.5 (C), 133.1 (CH), 133.2 (C), 132.8 (C), 132.5 (C, d, *J*<sub>C-F</sub> = 8 Hz), 132.4 (CH), 129.2 (CH), 129.1 (CH), 129.0 (CH), 128.8 (CH), 128.2 (CH), 127.7 (CH), 127.5 (CH), 119.1 (CH, d, *J*<sub>C-F</sub> = 4 Hz), 110.3 (CH, d, *J*<sub>C-F</sub> = 22 Hz), 60.9 (C), 39.0 (CH<sub>2</sub>), 13.1 (CH<sub>3</sub>); <sup>19</sup>F NMR (282 MHz, CDCl<sub>3</sub>) δ -119.80 (1F, s); HRMS (ESI) *m/z*: 522.1826 [M+H]<sup>+</sup>, C<sub>31</sub>H<sub>25</sub>FN<sub>3</sub>O<sub>4</sub><sup>+</sup> requires 522.1824.

**(R)-N,N'-(4-(4-Benzyl-3-methyl-5-oxo-4,5-dihydroisoxazol-4-yl)-5-chloro-1,2-phenylene)dibenzamide (3ah)**

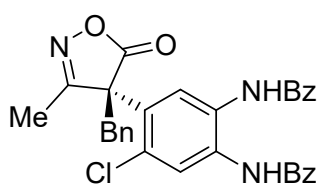

47.3 mg (88%) of **3ah** were obtained from **1a** (19.5 mg) and **2h** (34.8 mg). The enantiomeric excess (98%) was measured using chiral HPLC (Chiralpak IC), hex:<sup>i</sup>PrOH 80:20, 1 mL min<sup>-1</sup>, major enantiomer: *t*<sub>r</sub> = 11.3 min, minor enantiomer: *t*<sub>r</sub> = 17.5 min.

White solid; **m.p.** 253.5-255.2 °C;  $[\alpha]_D^{25}$  -16.7 (*c* 0.30, CHCl<sub>3</sub>); <sup>1</sup>H NMR (300 MHz, DMSO-*d*<sub>6</sub>) δ 10.30 (1H, s, NH), 10.22 (1H, s, NH), 8.20 (1H, s, Ar), 8.03-7.94 (6H, m, Ar), 7.63-7.54 (6H, m, Ar), 7.35-7.33 (3H, m, Ar), 7.21-7.18 (2H, m, Ar), 3.90 (1H, d, *J* = 12 Hz, CH-Ph), 3.43 (1H, d, *J* = 12 Hz, CH-Ph), 2.04 (3H, s, CH<sub>3</sub>); <sup>13</sup>C NMR (75 MHz, DMSO-*d*<sub>6</sub>) δ 177.9 (C), 166.2 (C), 166.0 (C), 165.7 (C), 133.91 (C), 133.90 (C), 133.4 (C), 132.4 (C), 132.2 (CH), 132.2 (CH), 130.4 (C), 130.0 (CH), 128.8 (CH), 128.7 (C), 128.63 (CH), 128.60 (CH), 128.4 (CH), 127.9 (CH), 127.8 (CH), 127.7 (CH), 127.5 (CH), 127.4 (CH), 127.3 (C), 126.5 (CH), 60.1 (C), 39.1 (CH<sub>3</sub>), 12.3 (CH<sub>2</sub>); HRMS (ESI) *m/z*: 538.1527 [M+H]<sup>+</sup>, C<sub>31</sub>H<sub>25</sub>ClN<sub>3</sub>O<sub>4</sub><sup>+</sup> requires 538.1528.

**(R)-N,N'-(4-(4-Benzoyl-3-methyl-5-oxo-4,5-dihydroisoxazol-4-yl)-5-hydroxy-1,2-phenylene)dibenzamide (3ai)**

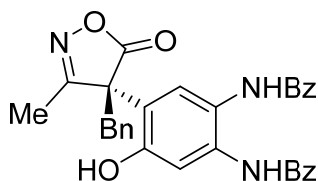

44.2 mg (85%) of **3ai** were obtained from **1a** (19.5 mg) and **2i** (33.0 mg). The enantiomeric excess (70%) was measured by chiral HPLC (Lux i-Amylose-1), hex:<sup>i</sup>PrOH 80:20, 1 mL min<sup>-1</sup>, major enantiomer: *t*<sub>r</sub> = 15.4 min, minor enantiomer: *t*<sub>r</sub> = 20.0 min.

White solid; **m.p.** 223.2-223.5 °C;  $[\alpha]_D^{25}$  -70.1 (*c* 0.40, CHCl<sub>3</sub>); <sup>1</sup>H NMR (300 MHz, DMSO-*d*<sub>6</sub>) 10.15 (1H, s, NH), 10.01 (1H, s, NH), 8.02 (2H, m, Ar), 7.93 (1H, m, Ar), 7.76 (1H, s, Ar), 7.56 (6H, m, Ar), 7.45 (1H, m, Ar), 7.32 (3H, m, Ar), 7.19 (2H, m, Ar), 3.76 (1H, d, *J* = 12.9 Hz, CH<sub>2</sub>-Ph), 3.31 (1H, *J* = 12.8 Hz, CH<sub>2</sub>-Ph), 1.95 (3H, s, CH<sub>3</sub>); <sup>13</sup>C NMR (75 MHz, DMSO-*d*<sub>6</sub>) δ 179.2 (C), 166.3 (C), 166.0 (C),

165.2 (C), 152.7 (C), 134.3 (C), 134.1 (C), 133.6 (C), 133.4 (C), 132.0 (CH), 131.9 (CH), 129.9 (CH), 128.7 (CH), 128.6 (CH), 128.3 (CH), 127.6 (CH), 127.4 (CH), 126.1 (CH), 122.2 (C), 117.6 (C), 110.9 (CH), 57.7 (C), 37.7 (CH<sub>2</sub>), 12.2 (CH<sub>3</sub>); **HRMS** (ESI)  $m/z$ : 520.1869 [M+H]<sup>+</sup>, C<sub>31</sub>H<sub>26</sub>N<sub>3</sub>O<sub>5</sub><sup>+</sup> requires 520.1867.

**(R)-N,N'-(5-(4-Benzyl-3-methyl-5-oxo-4,5-dihydroisoxazol-4-yl)-3,4-difluoro-1,2-phenylene)dibenzamide (3aj)**

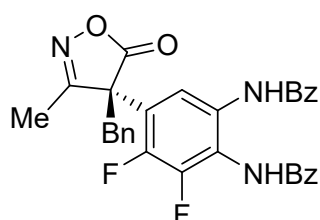

26.9 mg (54%) were obtained from **1a** (19.5 mg) and **2j** (35.0 mg). The enantiomeric excess (97%) was determined using HPLC (Chiralpak IC), hex:<sup>i</sup>PrOH 90:10, 1 mL min<sup>-1</sup>, major enantiomer:  $t_r$  = 32.9 min, minor enantiomer:  $t_r$  = 41.6 min.

Yellow oil;  $[\alpha]_D^{25}$  -57.3 (*c* 0.35, CHCl<sub>3</sub>); **<sup>1</sup>H NMR** (300 MHz, CDCl<sub>3</sub>)  $\delta$  9.85 (1H, NH, Ar), 8.95 (1H, NH, Ar), 8.06 (4H, m, Ar), 7.56 (8H, m, Ar), 7.27 (4H, m, Ar), 6.91 (2H, m, Ar), 3.26 (1H, d,  $J$  = 12.9 Hz, CH-Ph), 3.16 (1H, d,  $J$  = 12.9 Hz, CH-Ph), 1.64 (3H, s, CH<sub>3</sub>); **<sup>13</sup>C NMR** (125 MHz, CDCl<sub>3</sub>)  $\delta$  177.3 (C), 166.7 (C), 166.3 (C), 164.9 (C), 145.9 (C, dd,  $J_{C-F}$  = 249, 13 Hz), 145.3 (C, dd,  $J_{C-F}$  = 250, 14 Hz), 133.4 (CH), 132.8 (CH), 132.5 (C), 131.8 (C), 131.2 (C), 129.8 (br, C), 129.5 (CH), 129.2 (CH), 128.9 (CH), 128.7 (CH), 128.4 (CH), 127.9 (CH), 127.6 (CH), 121.9 (C, d,  $J_{C-F}$  = 10 Hz), 121.3 (C, d,  $J_{C-F}$  = 11 Hz), 118.5 (CH), 57.0 (C), 38.0 (CH<sub>2</sub>), 12.3 (CH<sub>3</sub>); **<sup>19</sup>F NMR** (282 MHz, CDCl<sub>3</sub>)  $\delta$  -138.71 (1F, d,  $J_{F-F}$  = 20.5 Hz), -139.99 (1F, bd); **HRMS** (ESI)  $m/z$ : 540.1727 [M+H]<sup>+</sup>, C<sub>31</sub>H<sub>24</sub>F<sub>2</sub>N<sub>3</sub>O<sub>4</sub><sup>+</sup> requires 540.1729.

**One mmol scale synthesis of compound 3aa**

Isoxazolin-5-one **1a** (131 mg, 1.1 mmol), diimide **2a** (314 mg, 1.0 mmol), and squaramide **SQ-3** (60 mg, 0.1 mmol) were introduced in a round bottom flask and dissolved in dichloromethane (100 mL). The mixture was stirred at -20 °C overnight. The solvent was removed under reduced pressure and the mixture chromatographed over silica gel eluting with hexane:EtOAc (8:2 to 6:4) to give 500 mg (99%) of compound **3aa** with identical spectroscopic features as those reported above and with 93% ee.

## Synthetic transformations

### (4*R*,5*R*)-4-Benzyl-4-(3,4-bis(4-chlorobenzamido)phenyl)-3-methyl-4,5-dihydroisoxazol-5-yl acetate and (4*R*,5*S*)-4-benzyl-4-(3,4-bis(4-chlorobenzamido)phenyl)-3-methyl-4,5-dihydroisoxazol-5-yl acetate (**4**)

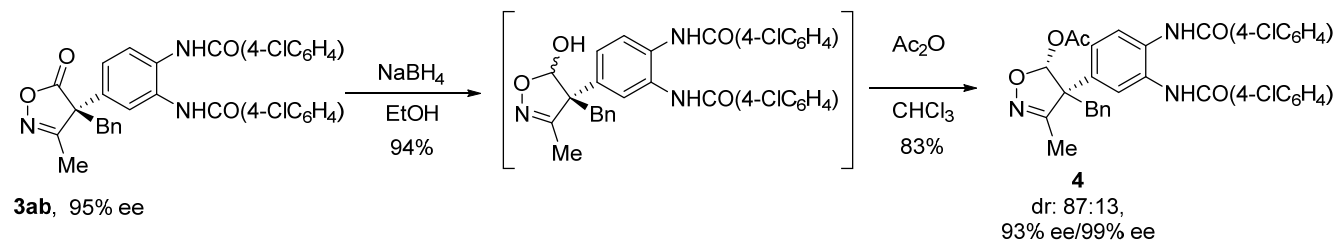

Isoxazol-5-one **3ab** (115 mg, 0.2 mmol, 1 eq) was added in portions to a solution of NaBH<sub>4</sub> (38 mg, 1 mmol, 5 eq) in a 1:1 mixture of EtOH:CH<sub>2</sub>Cl<sub>2</sub> (2 mL). The solution was stirred at room temperature for 24 h and quenched with water (1 mL). The phases were separated and the aqueous layer was extracted with dichloromethane (3×15 mL). The combined organic layers were dried over MgSO<sub>4</sub>, and concentrated under reduced pressure to obtain 109 mg (94%) of a mixture of lactols that were used in the next step without further purification.

The previously obtained lactol mixture was introduced in a round bottom flask and dissolved in CHCl<sub>3</sub> (5 mL). Acetic anhydride (26 μL, 0.27 mmol, 1.5 eq) and pyridine (78 μL, 0.97 mmol, 5.4 eq) were added dropwise and the reaction was stirred at room temperature for 24 h. Then, the mixture was purified by flash column chromatography using mixtures of hexane:EtOAc as eluent to give 91.6 mg (83%) of compound **4** as a ca. 87:13 diastereomer mixture. Pure samples of each diastereomer could be obtained by sem-preparative HPLC.

**Major diastereoisomer (4*R*,5*S*)-4:** The enantiomeric excess (93%) was measured by chiral HPLC (Chiralpak IC), hex:PrOH 80:20, 1 mL min<sup>-1</sup>, major enantiomer: t<sub>r</sub> = 29.3 min, minor enantiomer: t<sub>r</sub> = 20.3 min.

Yellow oil; [α]<sub>D</sub><sup>25</sup> +43.3 (*c* 0.98, CHCl<sub>3</sub>); <sup>1</sup>H NMR (300 MHz, CDCl<sub>3</sub>) δ 9.53 (1H, s, NH), 9.37 (1H, s, NH), 7.98 (4H, dd, *J* = 12.5, 8.6 Hz, Ar), 7.55-7.43 (6H, m, Ar), 7.28-7.24 (3H, m, Ar), 7.01 (2H, dd, *J* = 6.6, 2.8 Hz, Ar), 6.96 (1H, dd, *J* = 8.6, 2.1 Hz, Ar), 6.49 (1H, s, Ar), 3.40 (1H, d, *J* = 13.6 Hz, CH-Ph), 2.94 (1H, d, *J* = 13.6 Hz, CH-Ph), 1.59 (3H, s, CH<sub>3</sub>), 1.55 (3H, s, CH<sub>3</sub>); <sup>13</sup>C NMR (75 MHz, CDCl<sub>3</sub>) δ 169.1 (C), 165.4 (C), 165.2 (C), 159.4 (C), 139.3 (C), 139.1 (C), 134.0 (C), 132.7 (C), 131.3 (C), 130.5 (C), 130.3 (C), 129.8 (CH), 129.24 (CH), 129.20 (CH), 129.1 (CH), 128.9 (CH), 128.6 (CH), 127.9 (CH), 127.6 (CH), 125.8 (CH), 124.9 (CH), 100.5 (CH), 67.2 (C), 38.4 (CH<sub>2</sub>), 20.5 (CH<sub>3</sub>), 11.1 (CH<sub>3</sub>); HRMS (ESI) *m/z*: 654.0940 [M+K]<sup>+</sup>, C<sub>33</sub>H<sub>27</sub>Cl<sub>2</sub>KN<sub>3</sub>O<sub>5</sub><sup>+</sup> requires 654.0959.

**Minor diastereoisomer (4R,5R)-4:** The enantiomeric excess (99%) was measured by chiral HPLC (Chiralpak IC), hex:<sup>i</sup>PrOH 80:20, 1 mL min<sup>-1</sup>, major enantiomer: *t<sub>r</sub>* = 48.3 min, minor enantiomer: *t<sub>r</sub>* = 54.4 min.

Yellow oil; [ $\alpha$ ]<sub>D</sub><sup>25</sup> -142.5 (*c* 0.53, CHCl<sub>3</sub>); <sup>1</sup>H NMR (300 MHz, CDCl<sub>3</sub>)  $\delta$  9.23 (1H, s, NH), 8.78 (1H, s, NH), 7.87 (4H, dd, *J* = 8.6, 2.8 Hz, Ar), 7.72 (1H, d, *J* = 8.6 Hz, Ar), 7.53 (1H, d, *J* = 2.2 Hz, Ar), 7.46 (4H, dd, *J* = 8.6, 5.1 Hz, Ar), 7.29 (1H, dd, *J* = 8.6, 2.3 Hz, Ar), 7.20-7.12 (3H, m, Ar), 6.97 (2H, dd, *J* = 7.5, 2.1 Hz, Ar), 6.93 (1H, s, Ar), 3.71 (1H, d, *J* = 16.4 Hz, CH-Ph), 3.43 (1H, d, *J* = 16.4 Hz, CH-Ph), 1.95 (3H, s, CH<sub>3</sub>), 1.78 (3H, s, CH<sub>3</sub>); <sup>13</sup>C NMR (75 MHz, CDCl<sub>3</sub>)  $\delta$  169.1 (C), 165.9 (C), 165.0 (C), 162.3 (C), 139.0 (C), 138.7 (C), 136.1 (C), 135.1 (C), 132.1 (C), 131.6 (C), 131.1 (C), 130.6 (C), 129.2 (CH), 128.9 (CH), 128.8 (CH), 128.6 (CH), 128.54 (CH), 126.53 (CH), 126.1 (C), 124.6 (CH), 123.3 (CH), 64.2 (C), 33.8 (CH<sub>2</sub>), 20.5 (CH<sub>3</sub>), 10.1 (CH<sub>3</sub>); HRMS (ESI) *m/z*: 654.0940 [M+K]<sup>+</sup>, C<sub>33</sub>H<sub>27</sub>Cl<sub>2</sub>KN<sub>3</sub>O<sub>5</sub><sup>+</sup> requires 654.0959.

**(R)-N,N'-(4-(4-benzyl-3-methyl-5-oxo-4,5-dihydro-1H-pyrazol-4-yl)-1,2-phenylene)dibenzamide (5).**

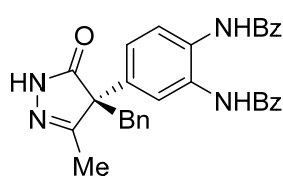

In a round bottom flask, compound **3aa** (47.3 mg, 0.094 mmol) was dissolved in absolute EtOH (1 mL) under nitrogen atmosphere. Then, 98% N<sub>2</sub>H<sub>4</sub>·H<sub>2</sub>O (45.8  $\mu$ L, 0.94 mmol) was added and the reaction mixture was stirred at 80 °C for 16h. After this time, the reaction was concentrated under reduced pressure,

dissolved in EtOAc (75 mL), washed with brine (2  $\times$  10 mL), dried over MgSO<sub>4</sub> and concentrated under reduced pressure to afford 39.6 mg (84%) of compound **5**. The enantiomeric excess (92%) was determined using chiral HPLC (ADH), hexane:<sup>i</sup>PrOH 80:20, 1.0 mL min<sup>-1</sup>, major enantiomer: *t<sub>r</sub>* = 35.9 min, minor enantiomer: *t<sub>r</sub>* = 17.0 min.

Yellow oil; [ $\alpha$ ]<sub>D</sub><sup>25</sup> 17.8 (*c* 0.29, CHCl<sub>3</sub>); <sup>1</sup>H NMR (300 MHz, CDCl<sub>3</sub>)  $\delta$  9.33 (1H, s, NH), 9.31 (1H, s, NH), 8.17 (1H, s, NH), 8.00 (1H, d, *J* = 6.8 Hz, Ar), 7.61-7.45 (8H, m, *J* = Ar), 7.24-7.22 (3H, m, Ar), 7.13-7.10 (2H, m, Ar), 6.98 (1H, dd, *J* = 8.5, 2.2 Hz, Ar), 3.55 (1H, d, *J* = 13.2 Hz, CH-Ph), 3.21 (1H, d, *J* = 13.2 Hz, CH-Ph), 1.93 (3H, s, Me); <sup>13</sup>C NMR (75 MHz, CDCl<sub>3</sub>)  $\delta$  177.9 (C), 166.5 (C), 162.5 (C), 134.1 (C), 133.54 (C), 133.48 (C), 133.3 (C), 132.34 (CH), 132.28 (CH), 131.4 (C), 130.8 (C), 129.3 (CH), 128.80 (CH), 128.78 (C), 128.5 (CH), 127.63 (CH), 127.61 (C), 127.5 (CH), 126.4 (CH), 124.2 (CH), 123.6 (CH), 61.8 (C), 38.5 (CH<sub>2</sub>), 15.0 (CH<sub>3</sub>); HRMS (ESI) *m/z*: 503.2082 [M+H]<sup>+</sup>, C<sub>31</sub>H<sub>27</sub>N<sub>4</sub>O<sub>3</sub><sup>+</sup> requires 503.2078.

**(R)-4-Benzyl-3-methyl-4-(2-phenyl-1H-benzo[d]imidazol-6-yl)isoxazol-5(4H)-one (6)**

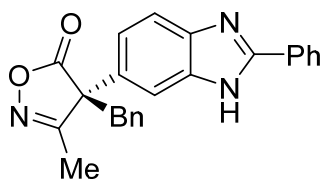

A solution of compound **3aa** (30 mg, 0.06 mmol) and *p*-TsOH·H<sub>2</sub>O (23 mg (0.12 mmol) in xylenes (1 mL) was stirred at 100 °C for 72h. Then, the mixture was cooled to room temperature, diluted with EtOAc (30 mL) and washed with saturated aqueous NaHCO<sub>3</sub> (10 mL) and brine (10 mL), dried and concentrated under reduced pressure. Flash column chromatography using mixtures of hexane:EtOAc (8:2 to 5:5) gave 13.2 mg (58%) of compound **6**. The enantiomeric excess (91%) was determined using chiral HPLC (IC), hexane:*i*PrOH 80:20, 1.0 mL min<sup>-1</sup>, major enantiomer: *t<sub>r</sub>* = 22.0 min, minor enantiomer: *t<sub>r</sub>* = 15.1 min.

Yellow solid; **m.p.** 140.2-142.4 °C; [ $\alpha$ ]<sub>D</sub><sup>25</sup> -55.3 (*c* 0.27, CHCl<sub>3</sub>); **<sup>1</sup>H NMR** (300 MHz, CDCl<sub>3</sub>)  $\delta$  8.09-8.06 (2H, m, Ar), 7.84-7.67 (1H, m, Ar), 7.51-7.49 (4H, m, Ar), 7.33-7.30 (3H, m, Ar), 7.21-7.18 (2H, m, Ar), 7.08 (1H, bs, NH), 3.73 (1H, d, *J* = 13.4 Hz, CH-Ph), 3.43 (1H, d, *J* = 13.4 Hz, CH-Ph), 2.00 (3H, s, Me); **<sup>13</sup>C NMR** (75 MHz, CDCl<sub>3</sub>)  $\delta$  179.7 (C), 168.5 (C), 153.2 (C), 136.5 (C), 133.4 (C), 130.7 (CH), 129.3 (C), 129.2 (CH), 129.0 (CH), 128.3 (C), 128.1 (CH), 126.7 (CH), 120.9 (C), 61.6 (C), 38.6 (CH<sub>2</sub>), 13.0 (CH<sub>3</sub>); **HRMS** (ESI) *m/z*: 382.1552 [M+H]<sup>+</sup>, C<sub>24</sub>H<sub>20</sub>N<sub>3</sub>O<sub>2</sub><sup>+</sup> requires 382.1550.



# NMR spectra for compounds 3-6

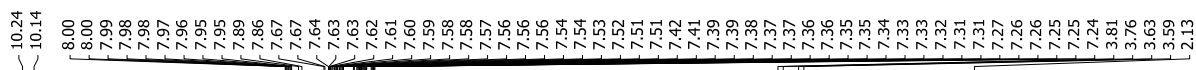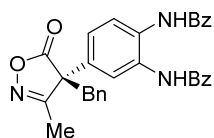

<sup>1</sup>H NMR (300 MHz, DMSO-d<sub>6</sub>)

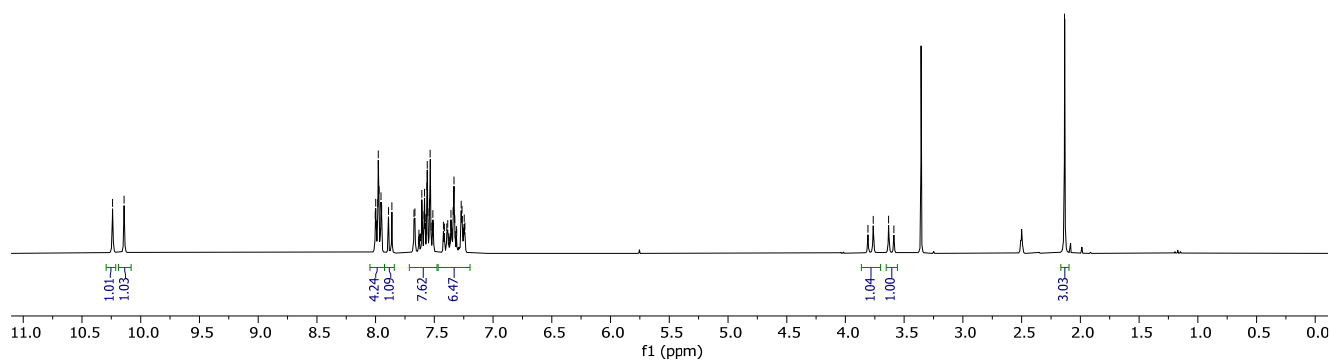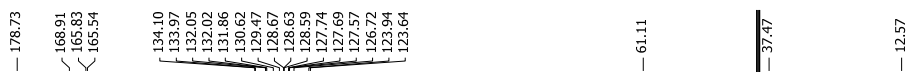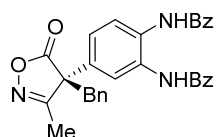

<sup>13</sup>C NMR (75 MHz, DMSO-d<sub>6</sub>)

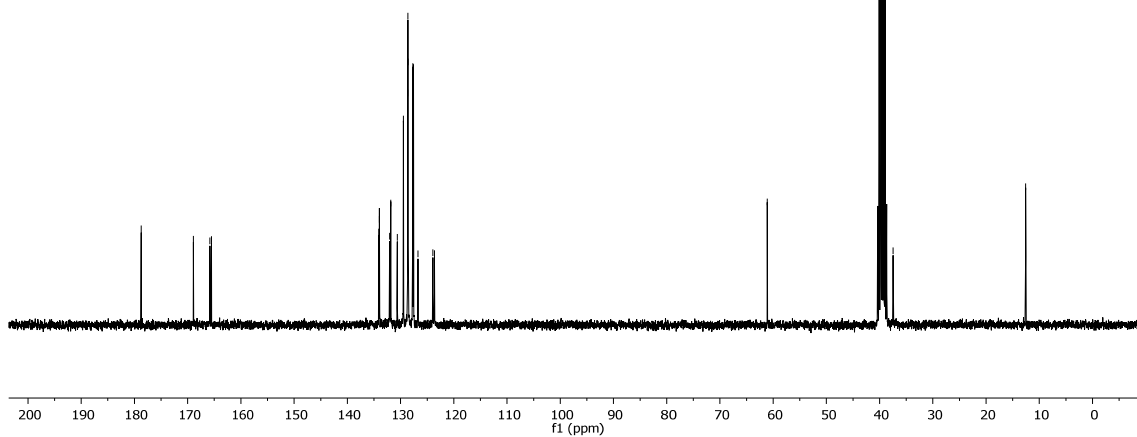

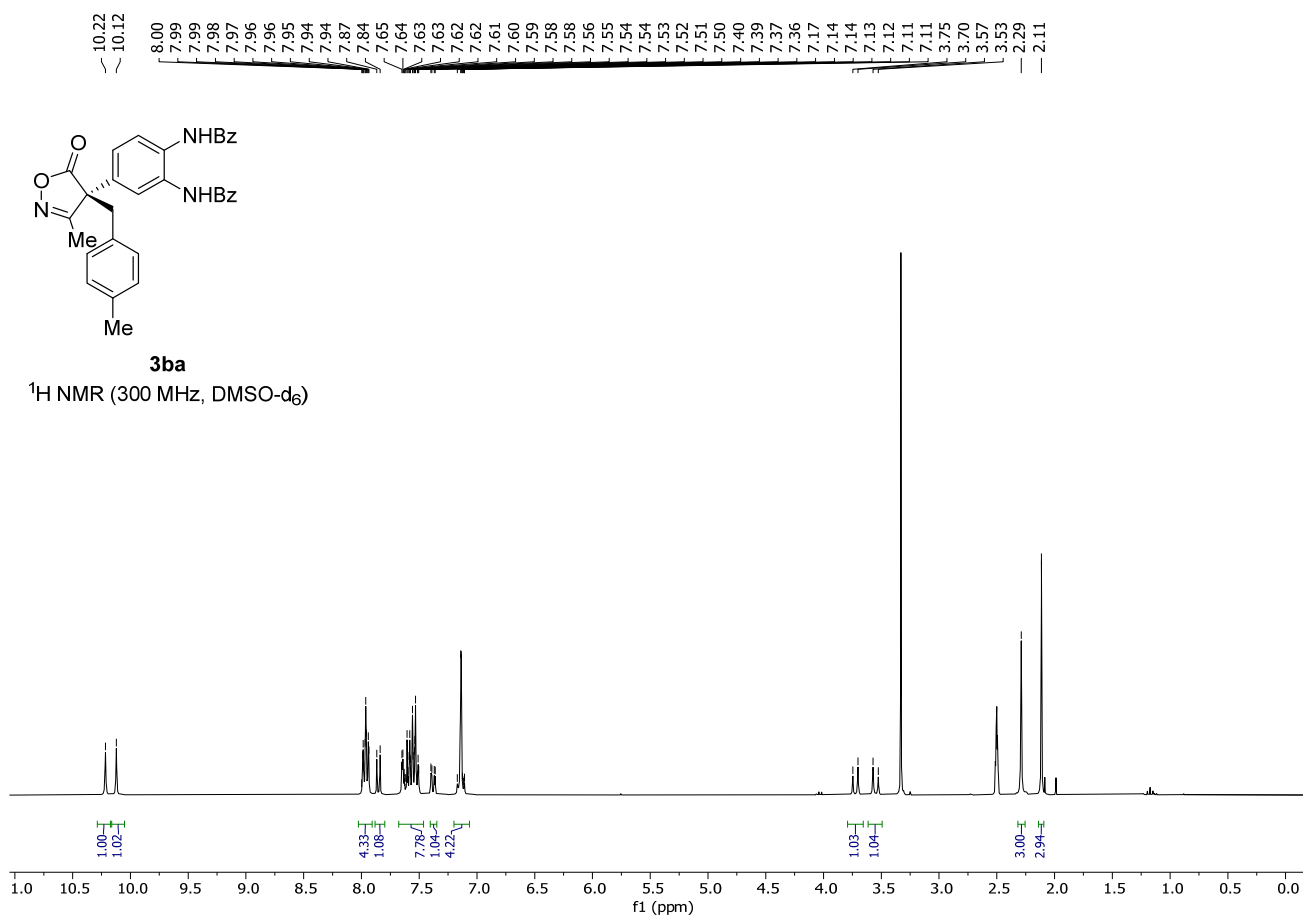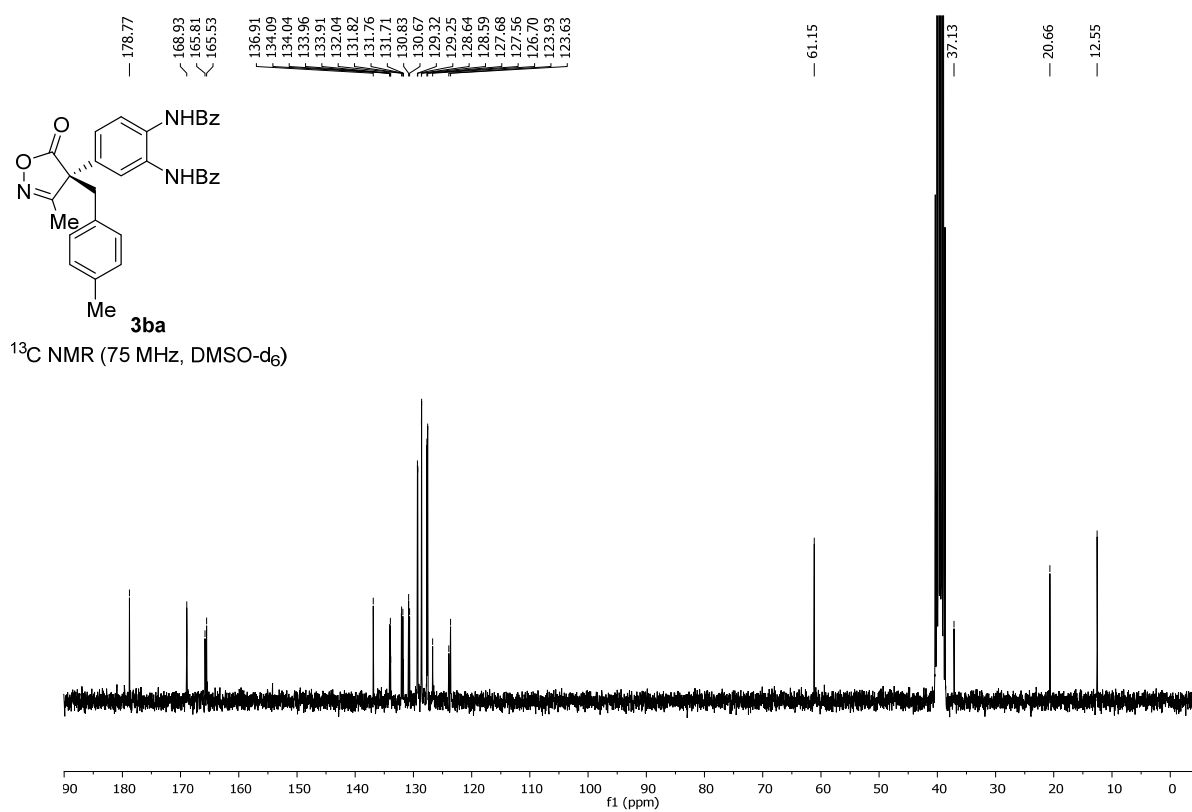

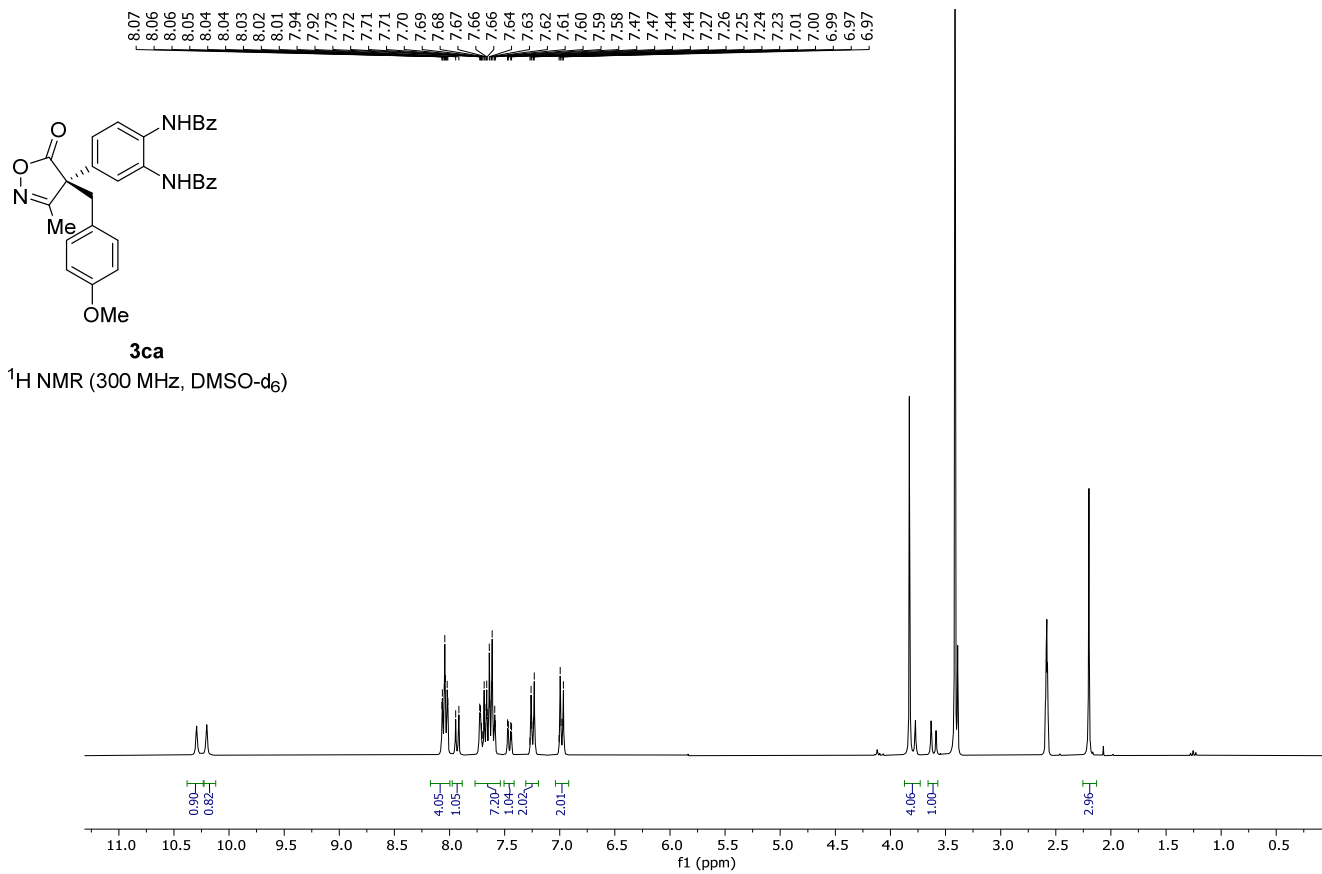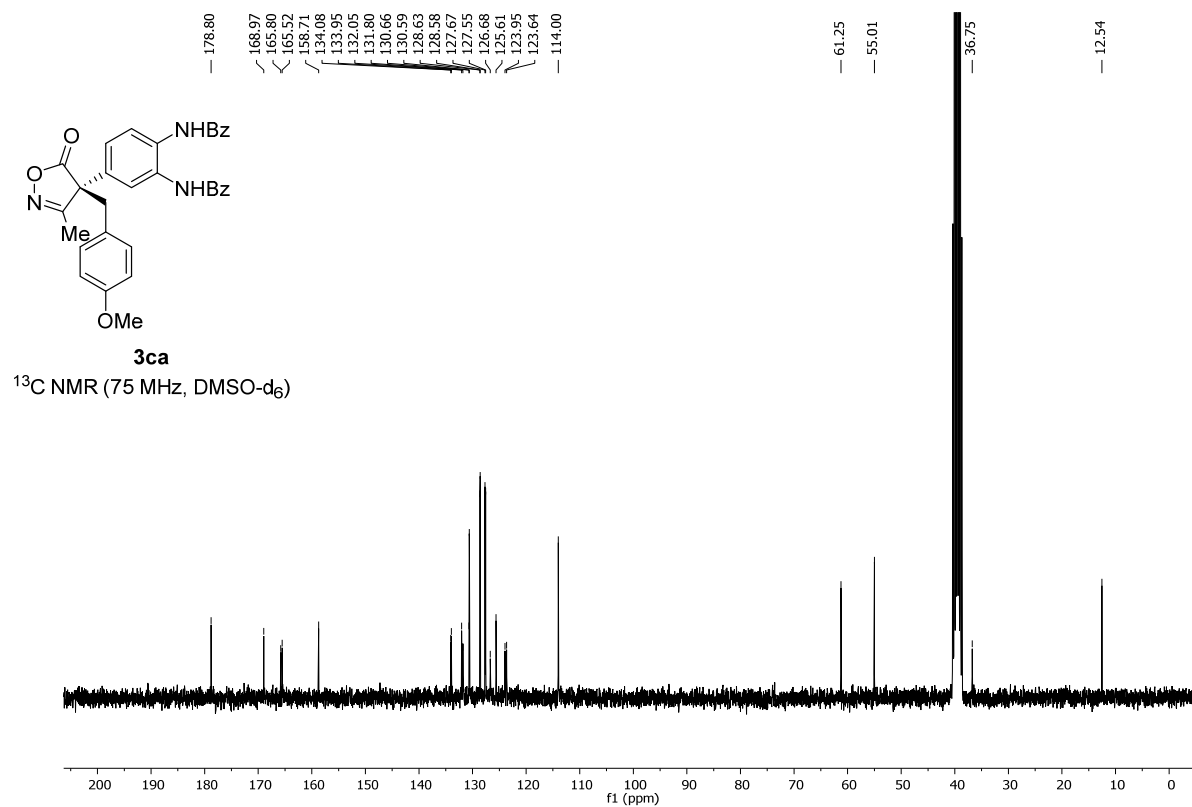

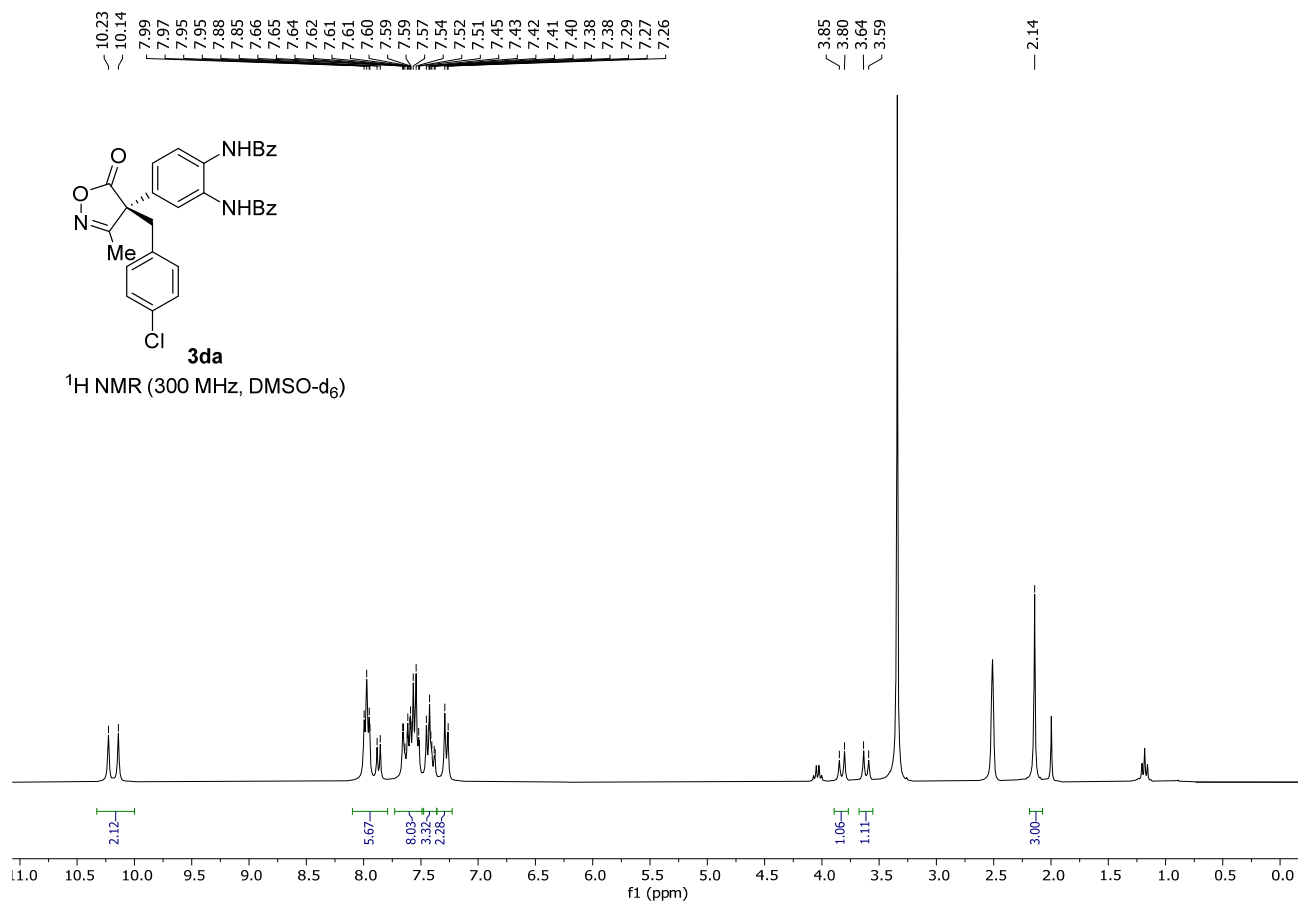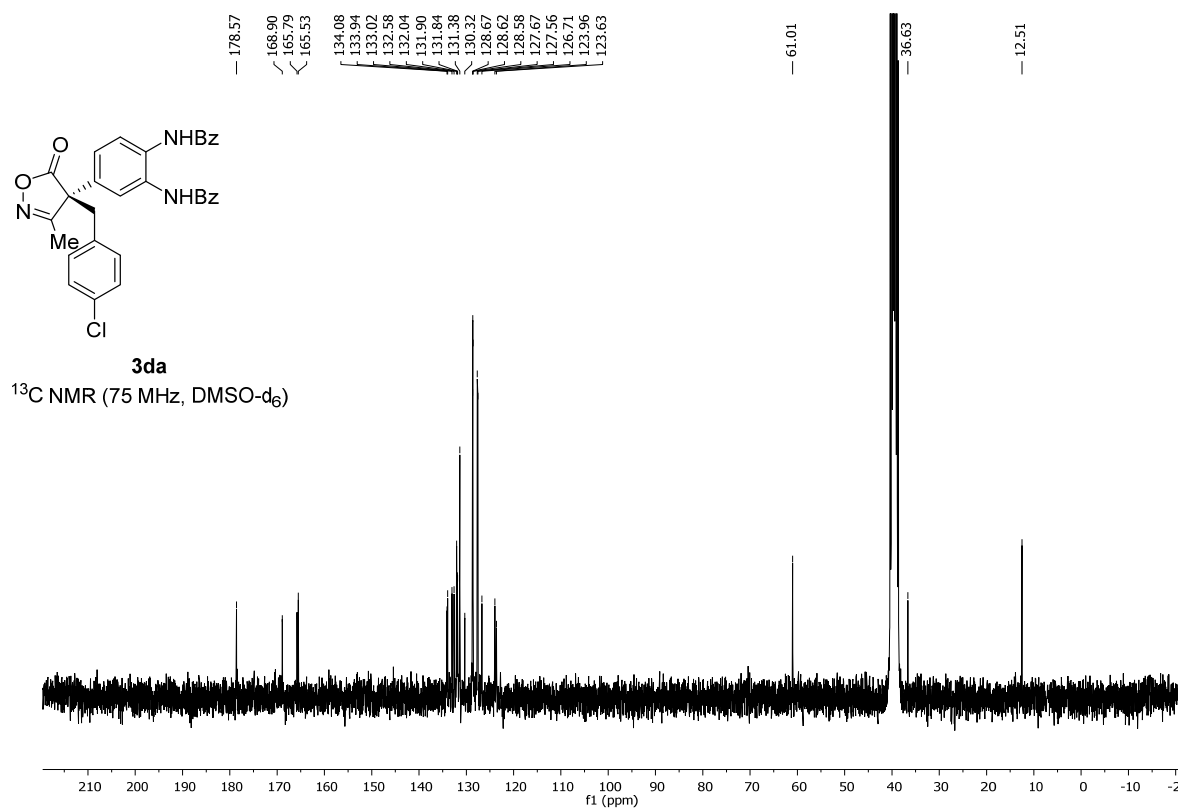

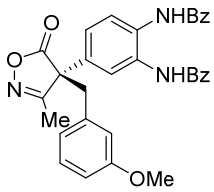

**3ea**

<sup>1</sup>H NMR (300 MHz, CDCl<sub>3</sub>)

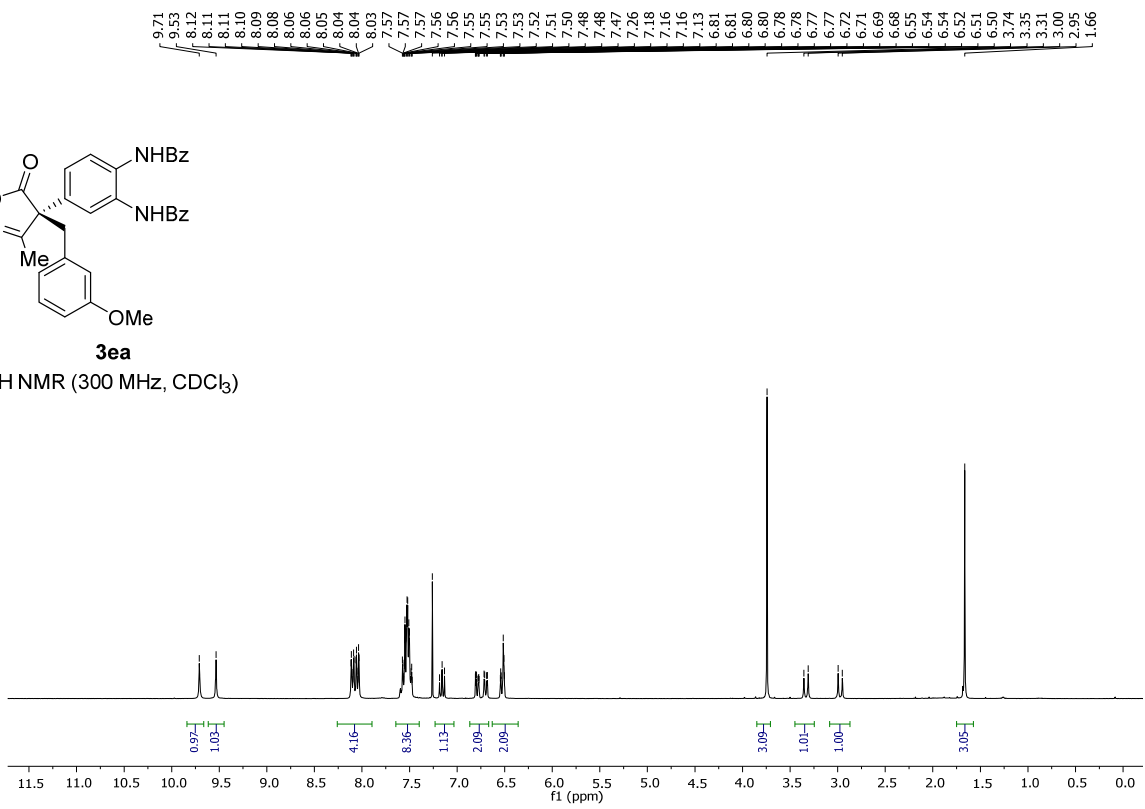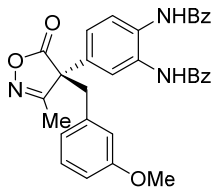

**3ea**

<sup>13</sup>C NMR (75 MHz, CDCl<sub>3</sub>)

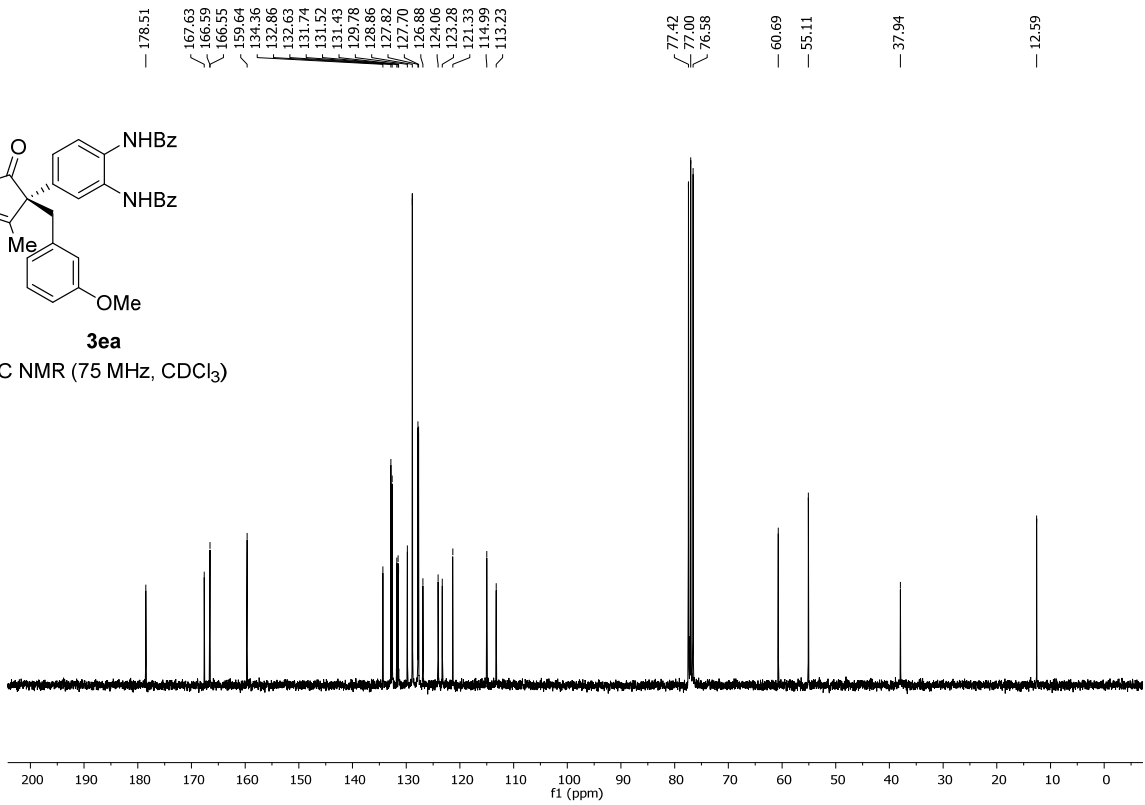

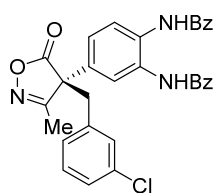

**3fa**

$^1\text{H NMR}$  (300 MHz,  $\text{CDCl}_3$ )

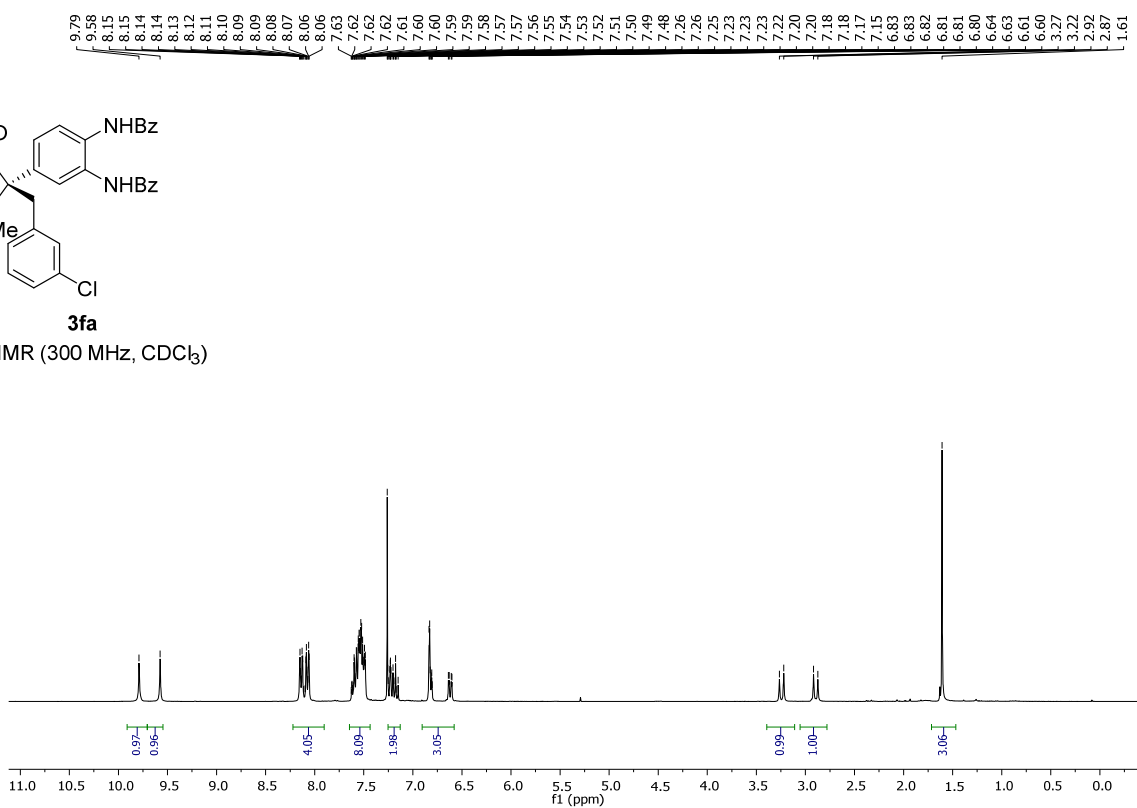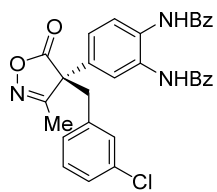

**3fa**

$^{13}\text{C NMR}$  (75 MHz,  $\text{CDCl}_3$ )

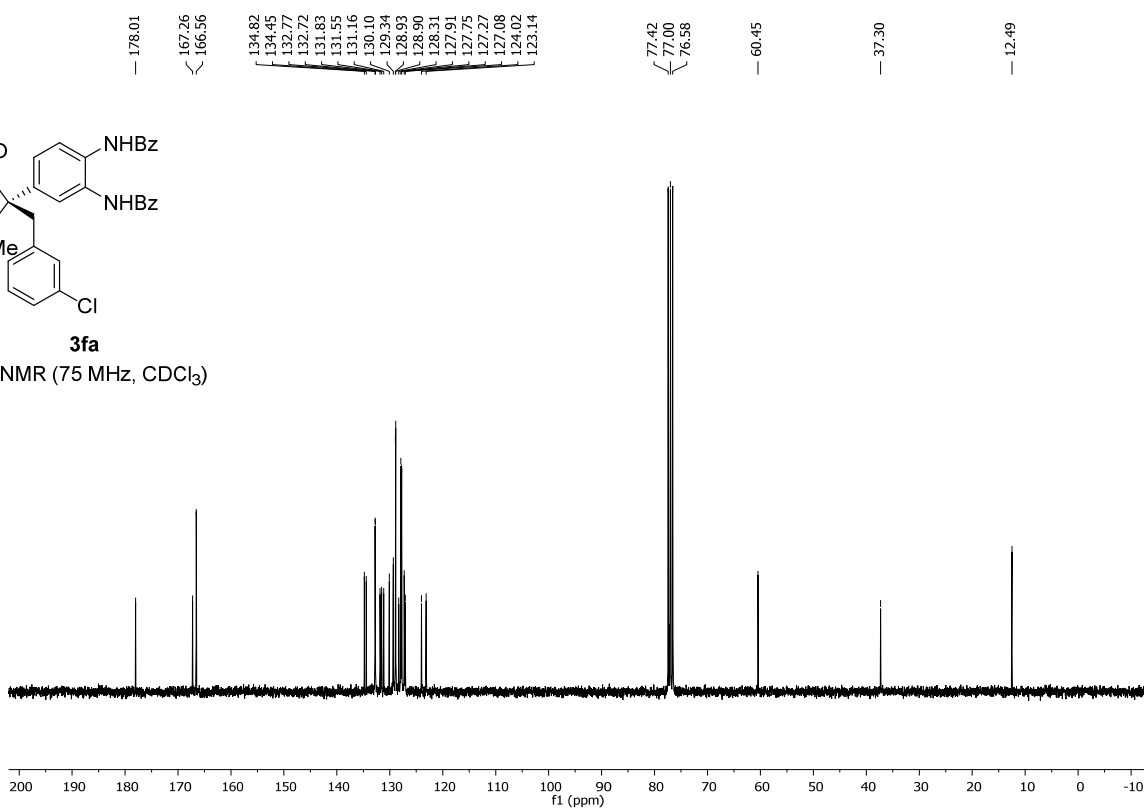

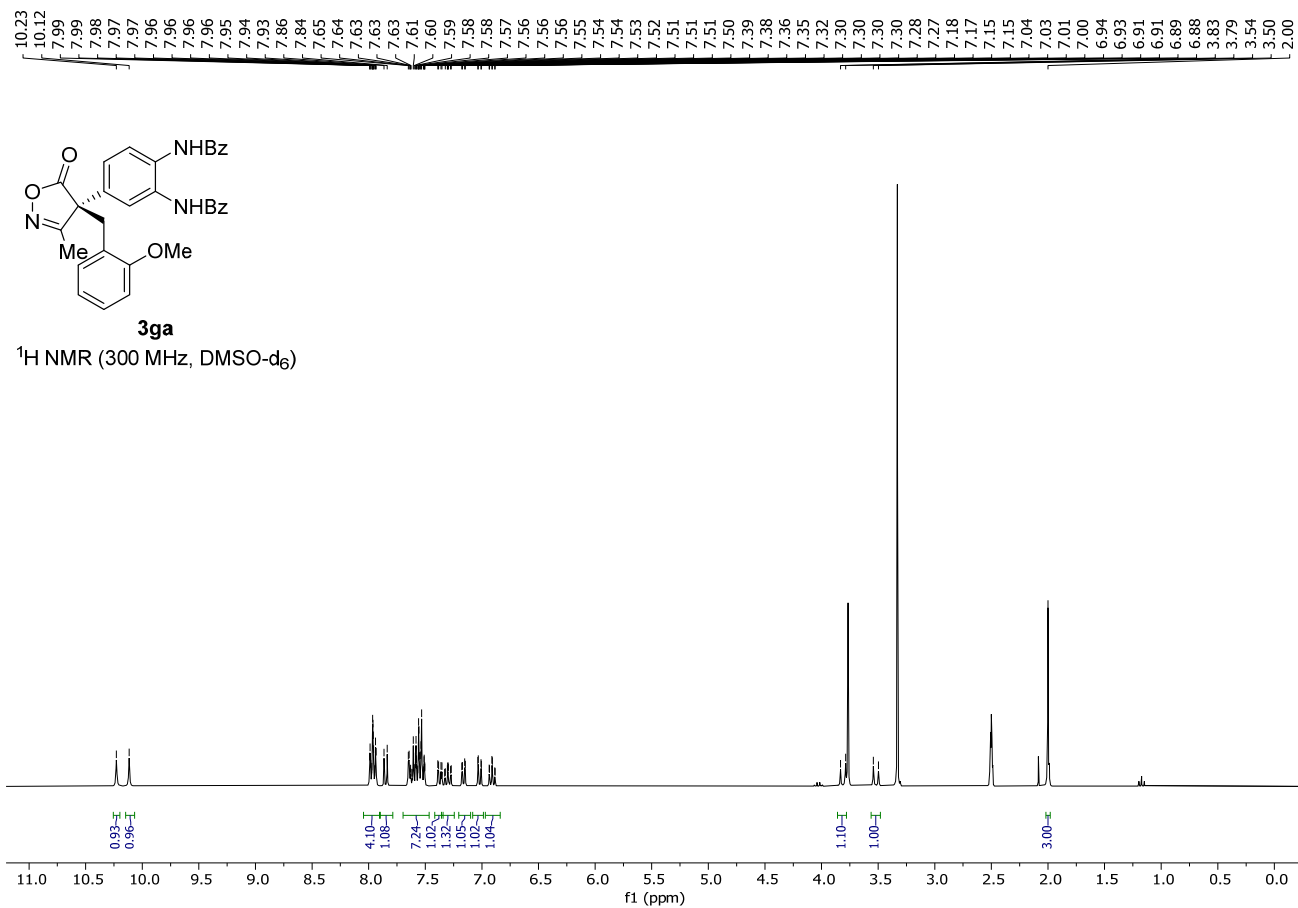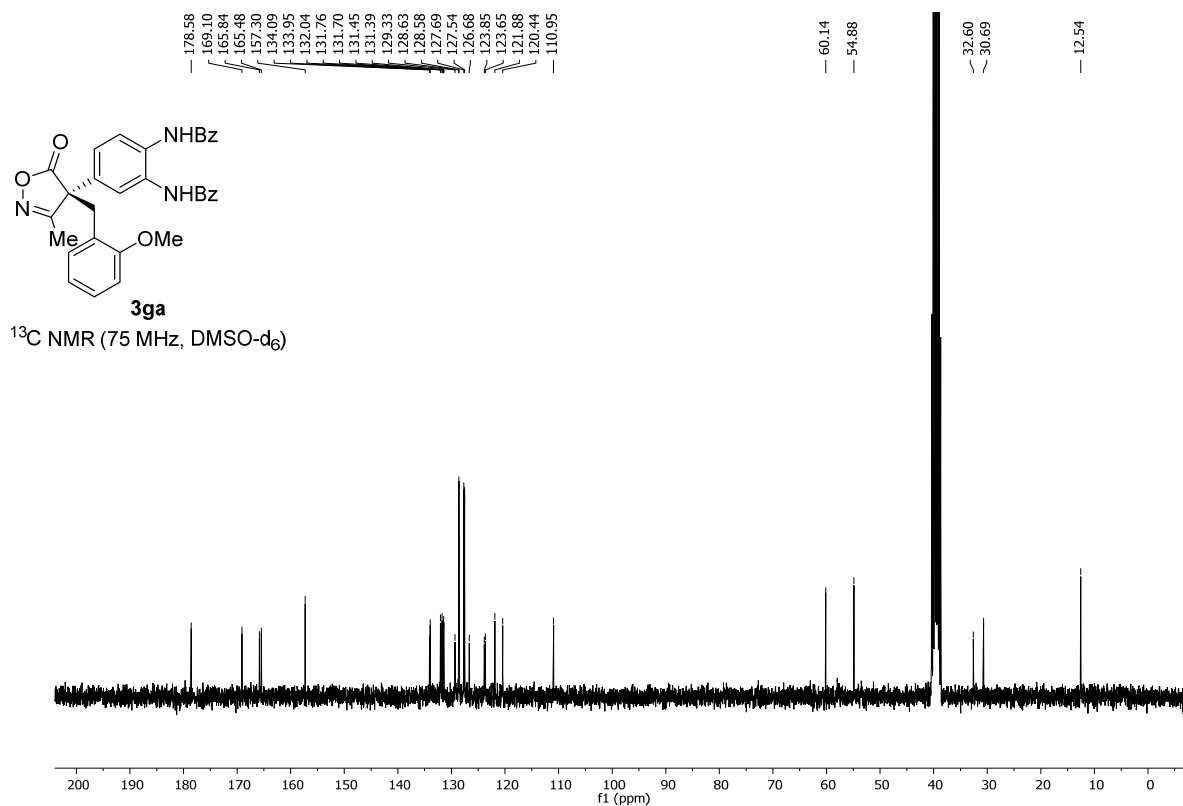

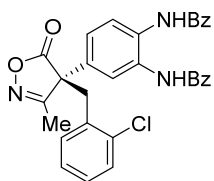

**3ha**

<sup>1</sup>H NMR (300 MHz, CDCl<sub>3</sub>)

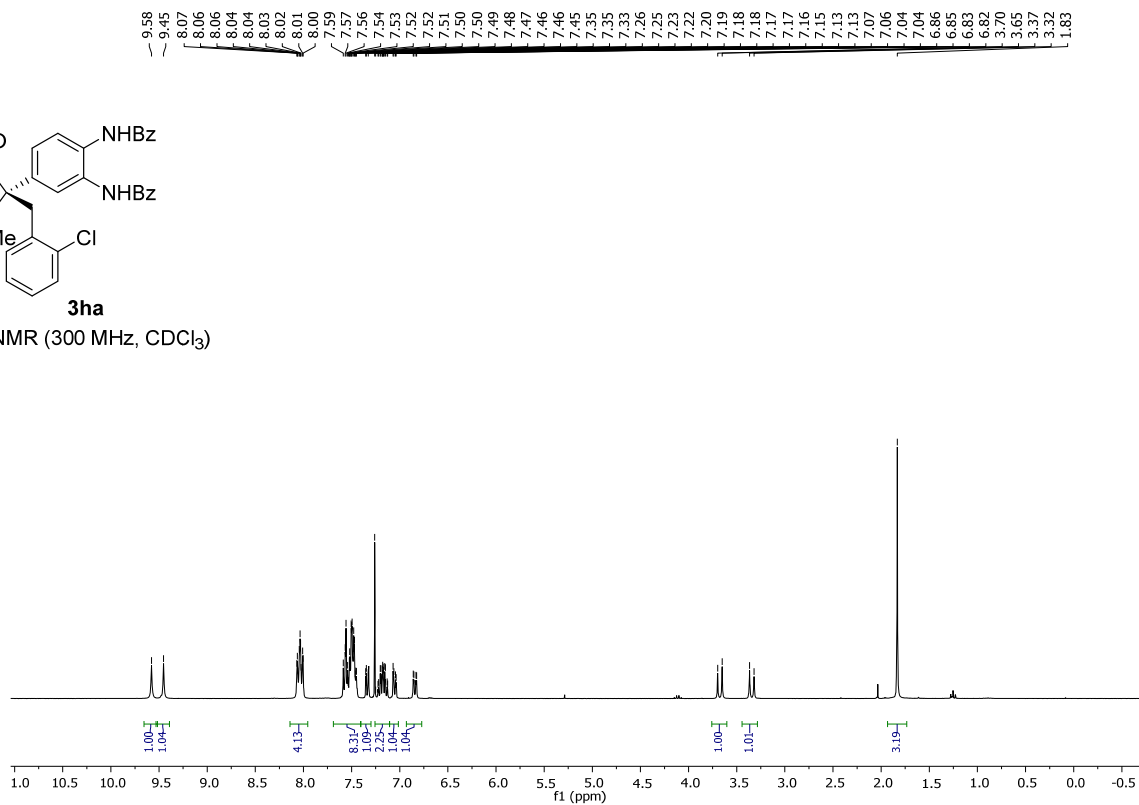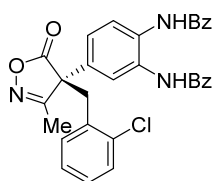

**3ha**

<sup>13</sup>C NMR (75 MHz, CDCl<sub>3</sub>)

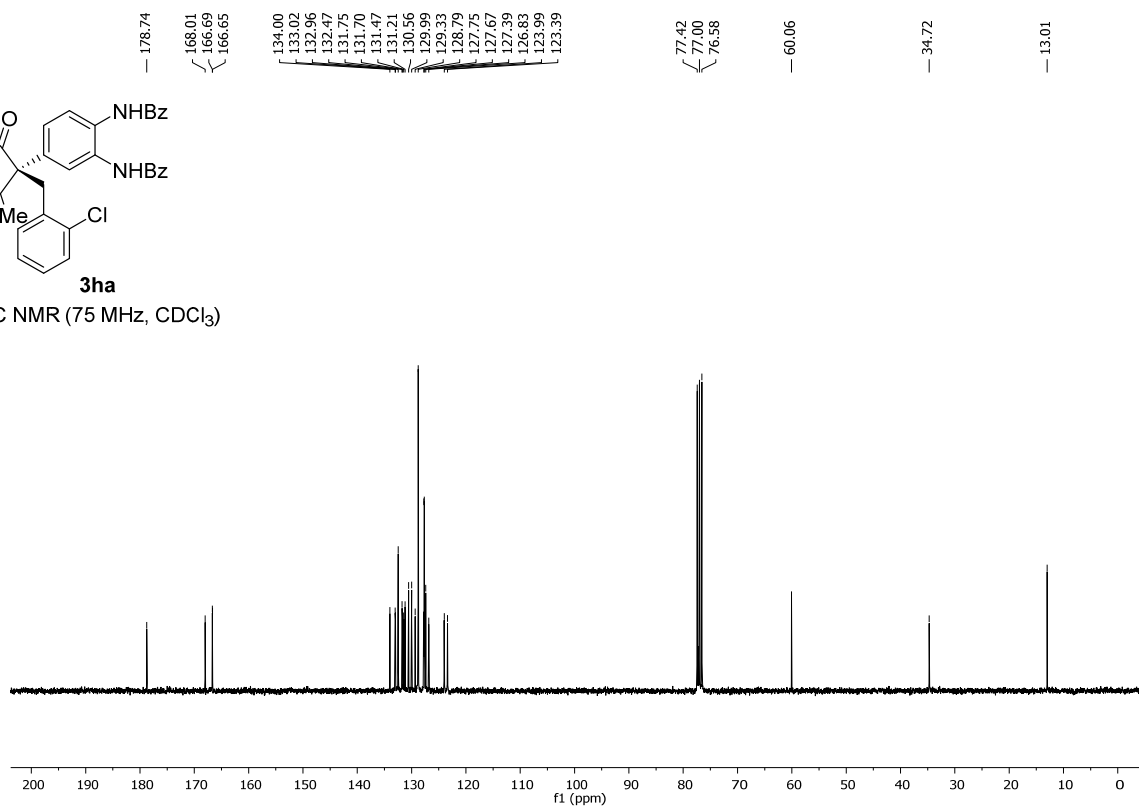



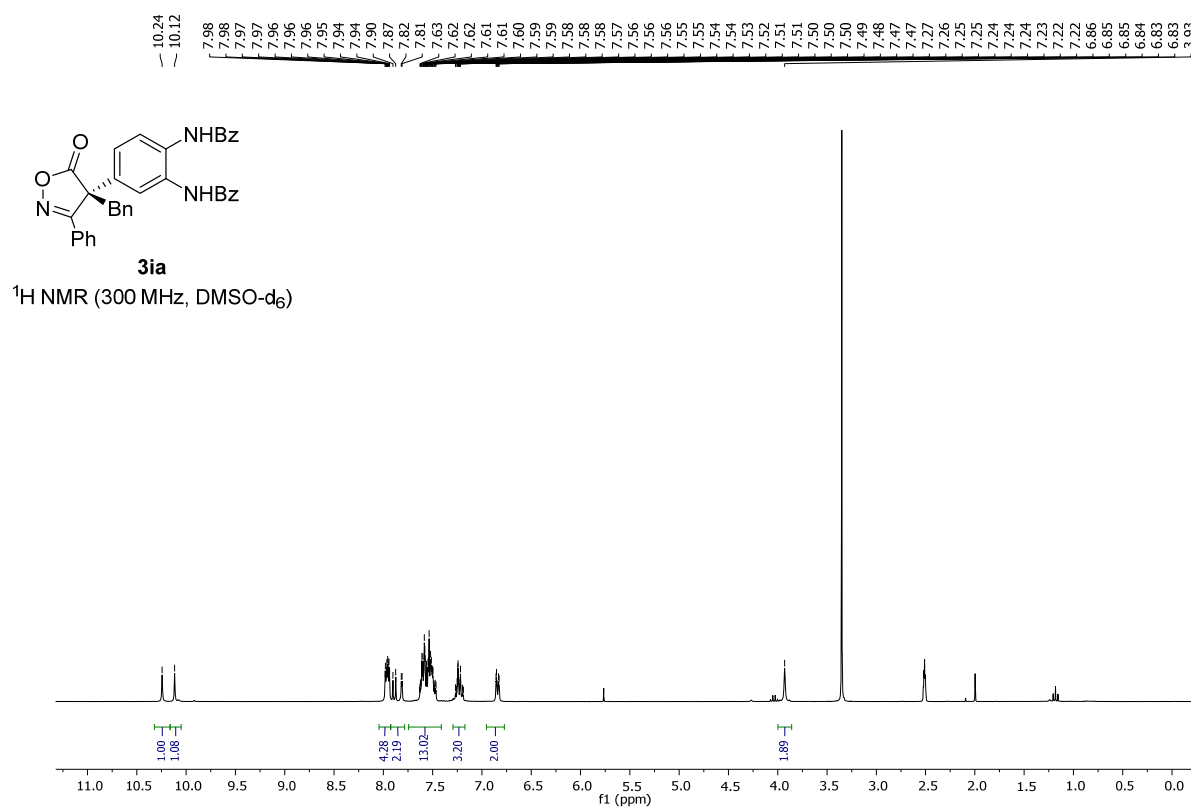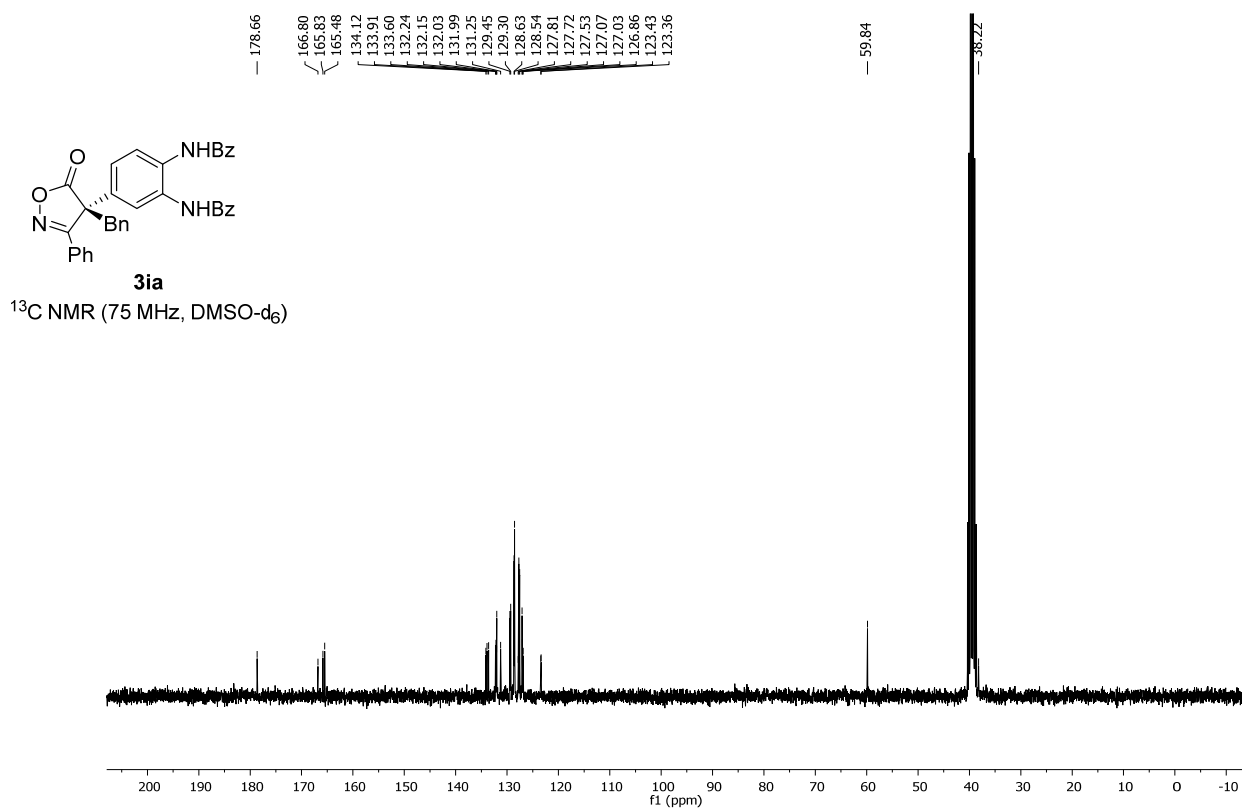

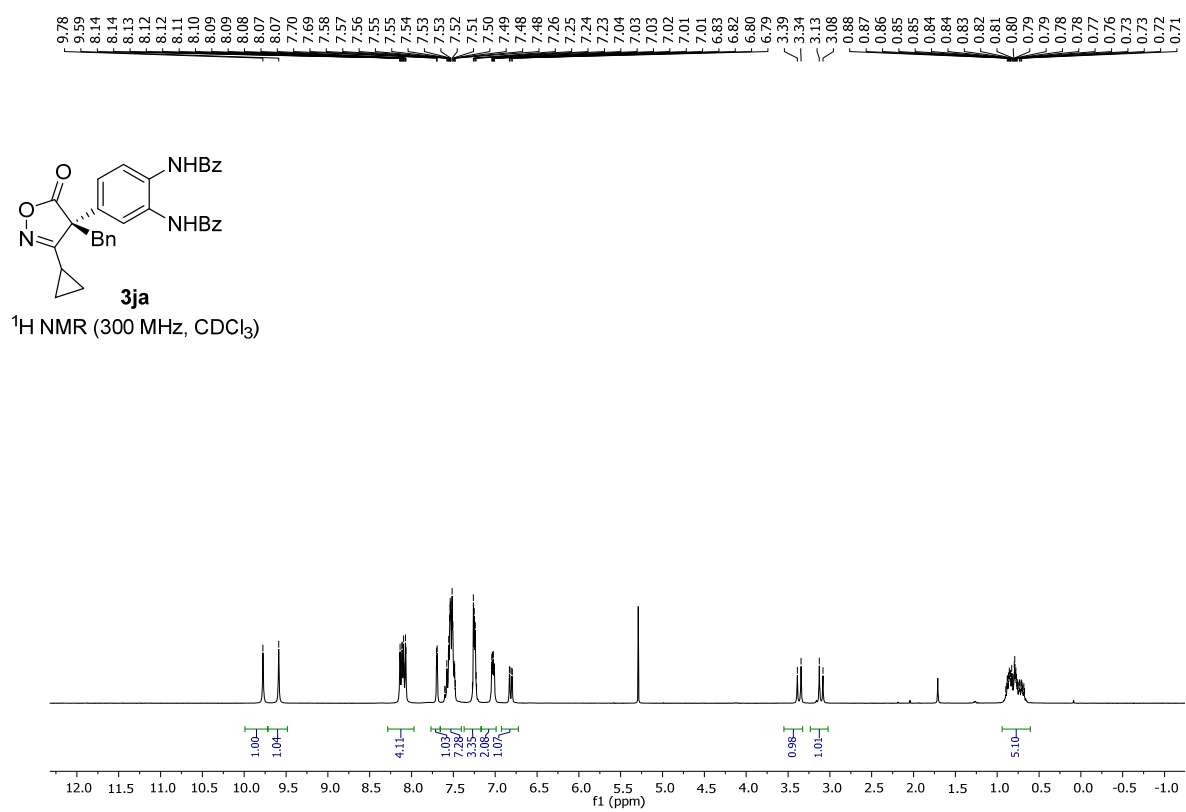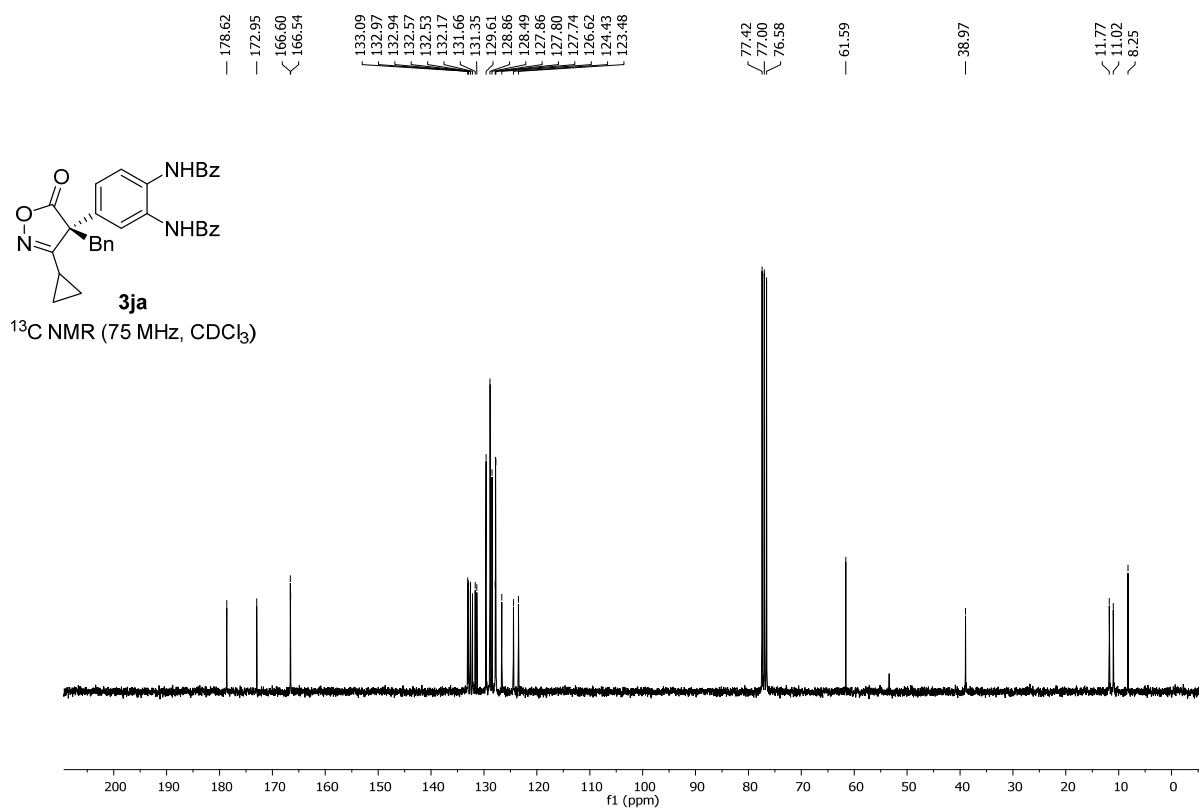

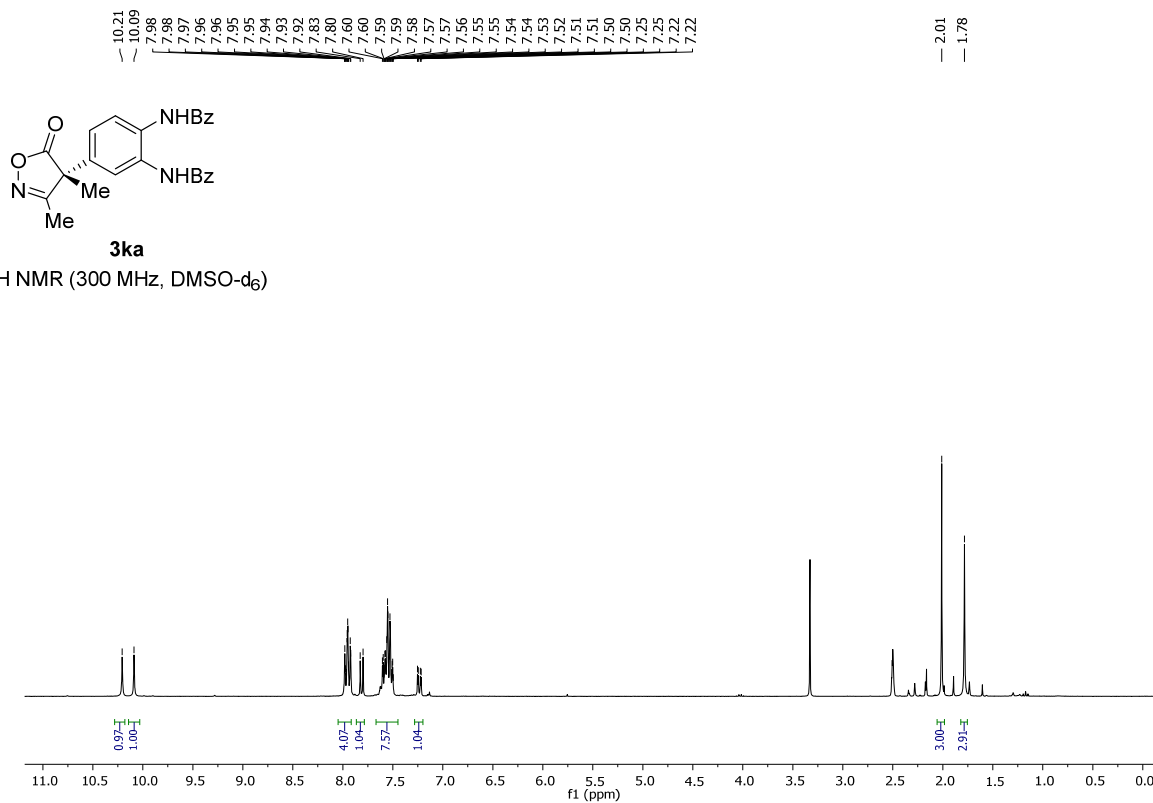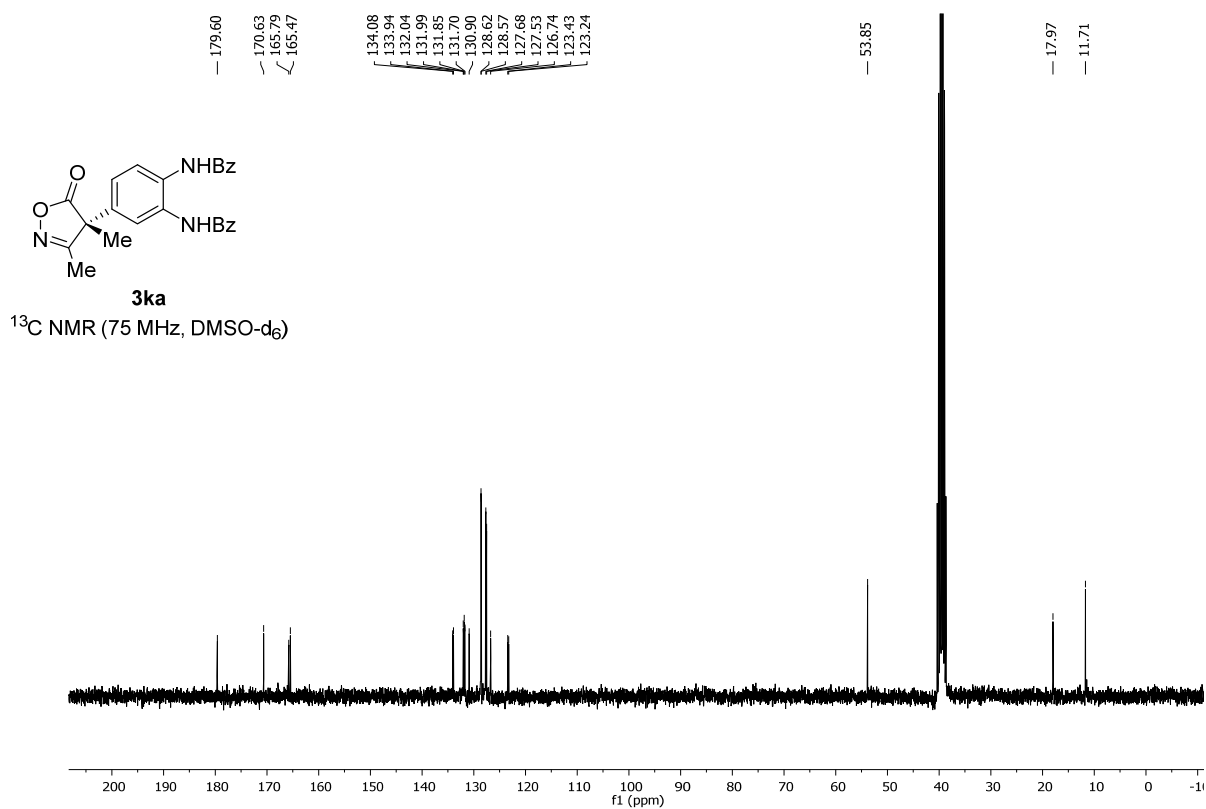

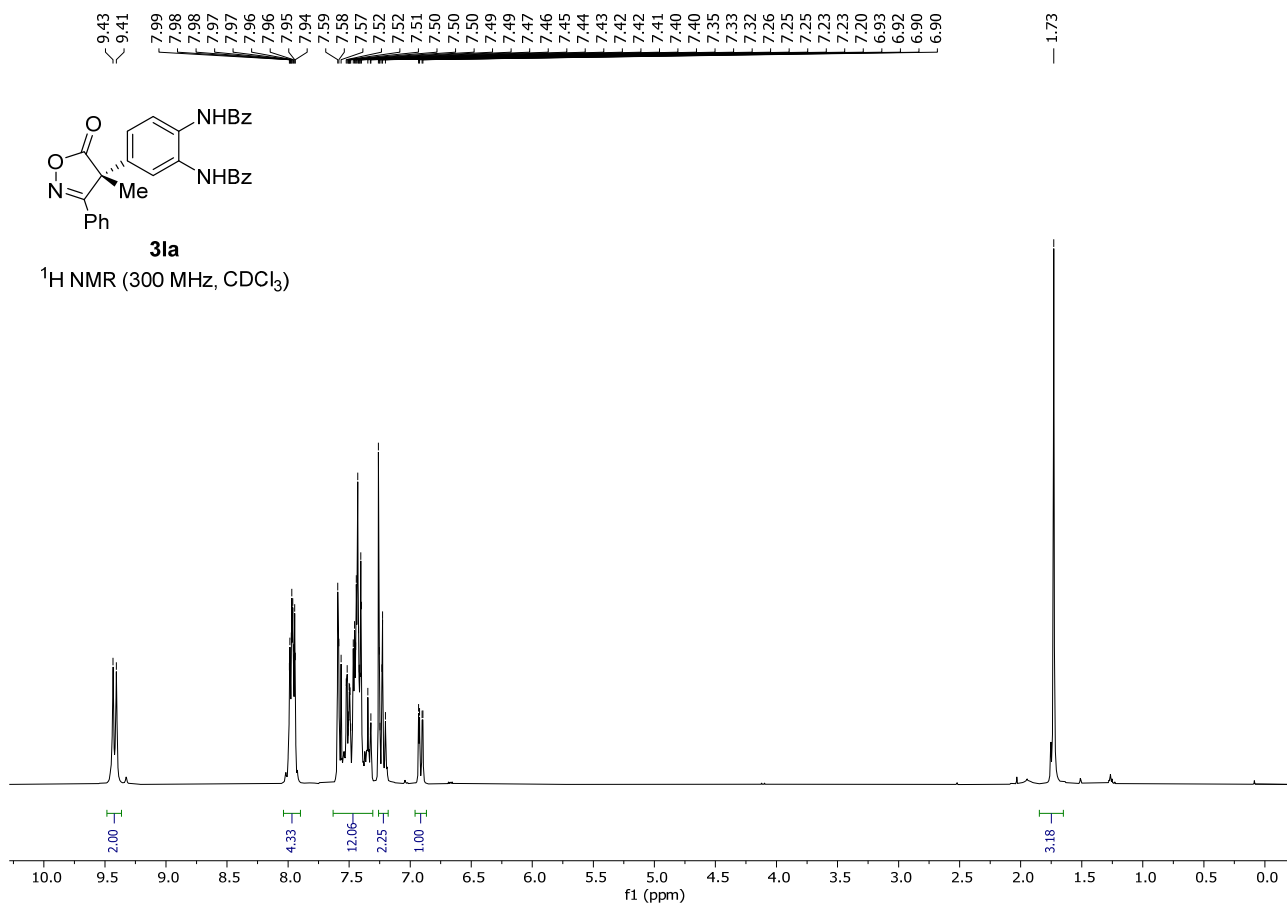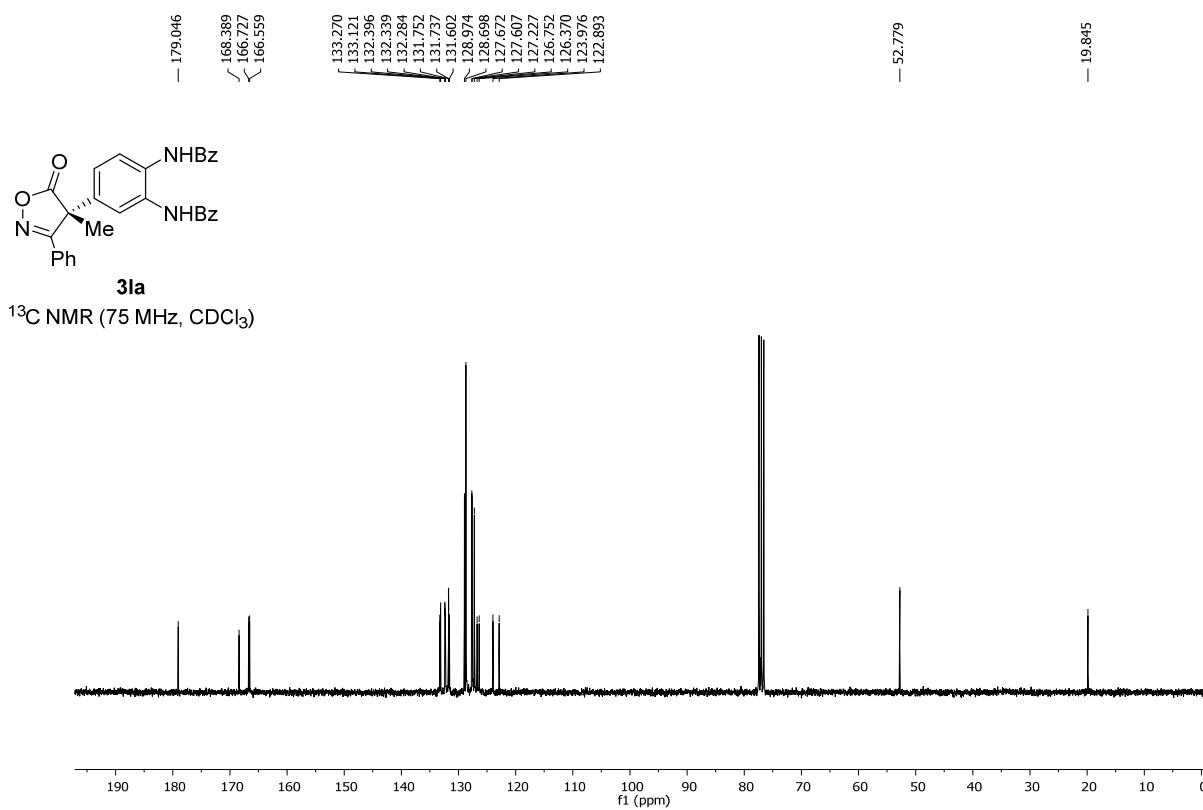

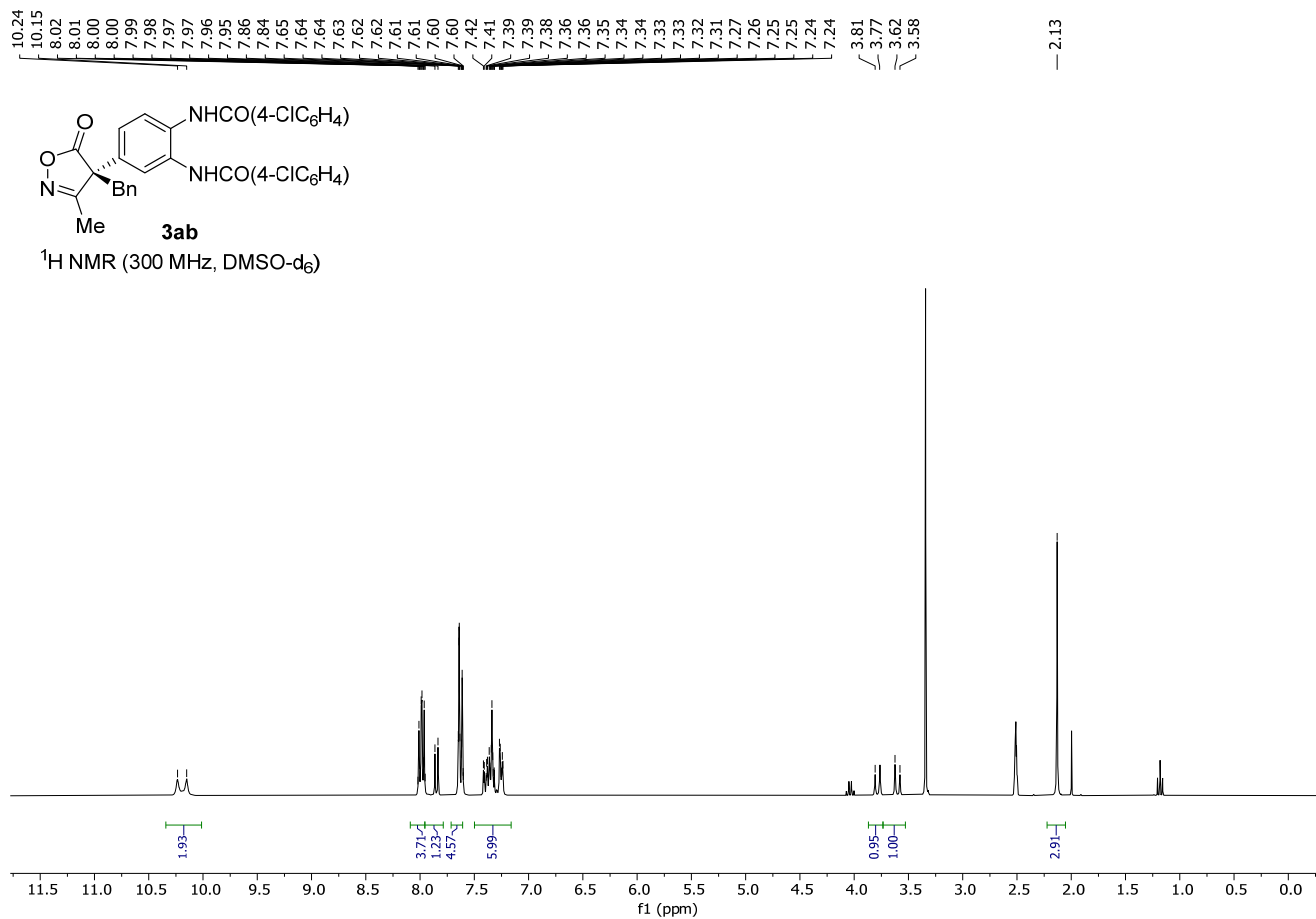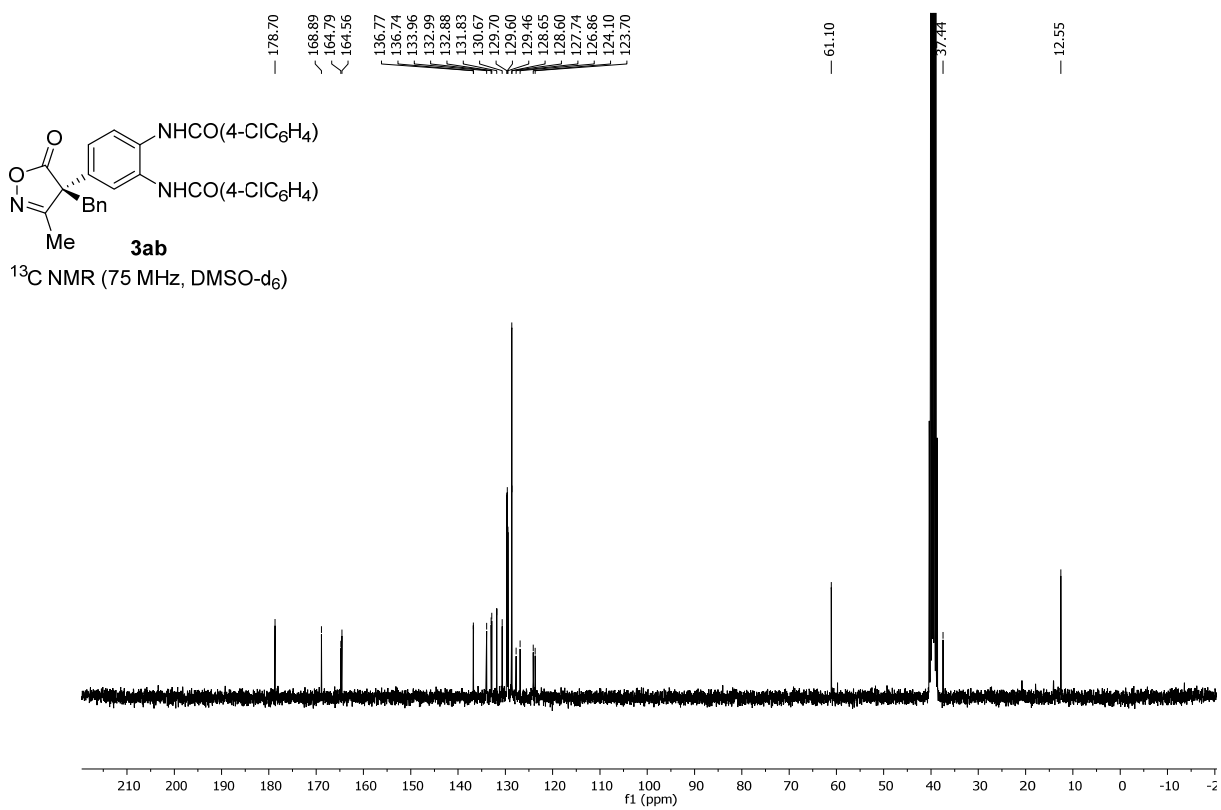

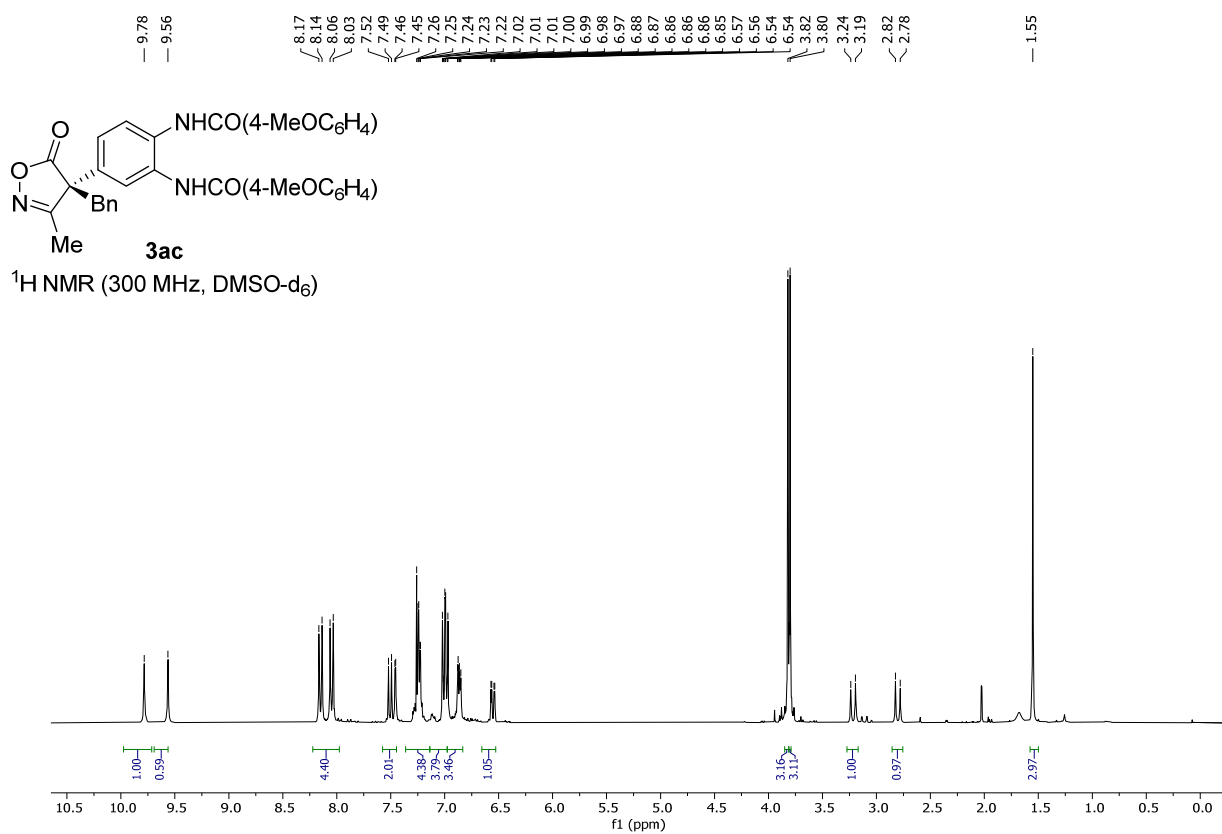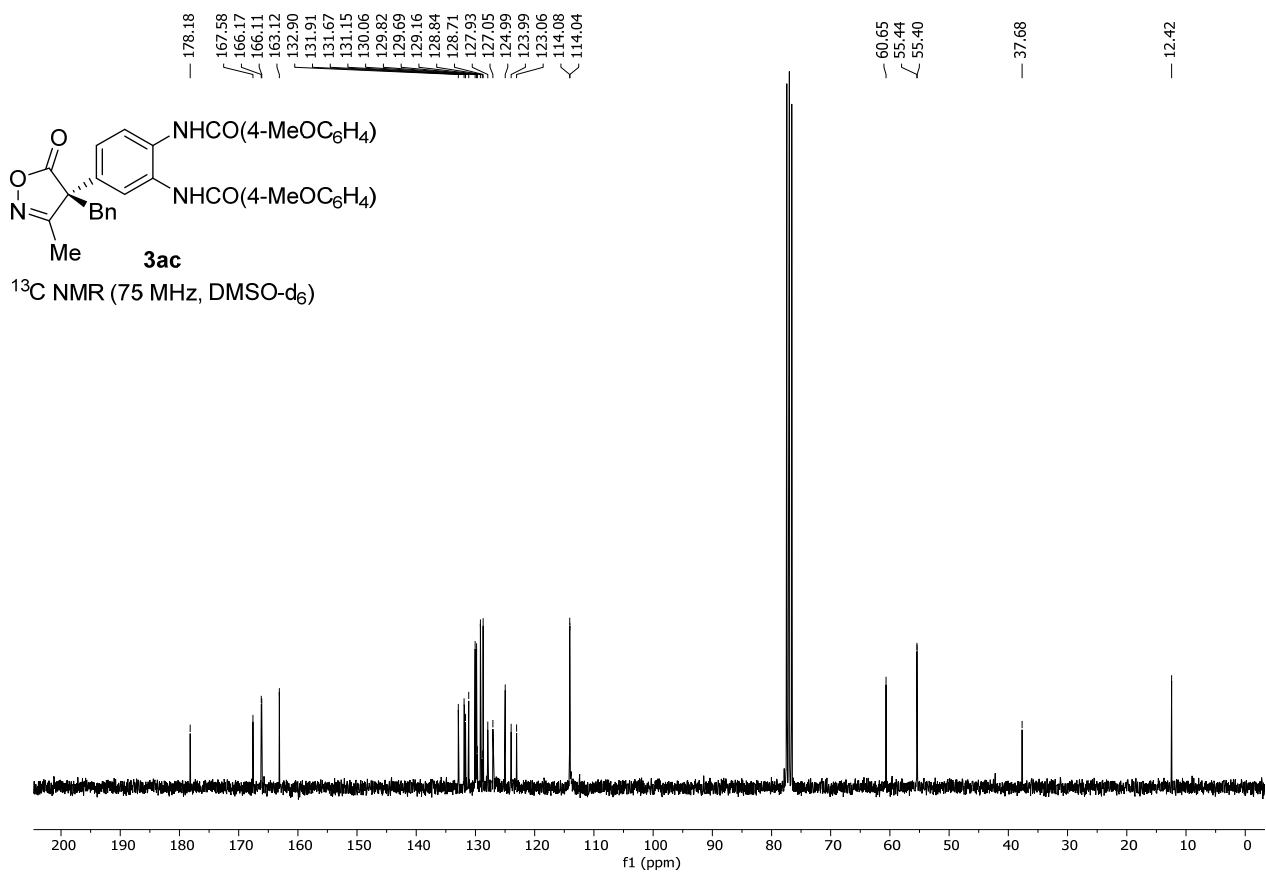

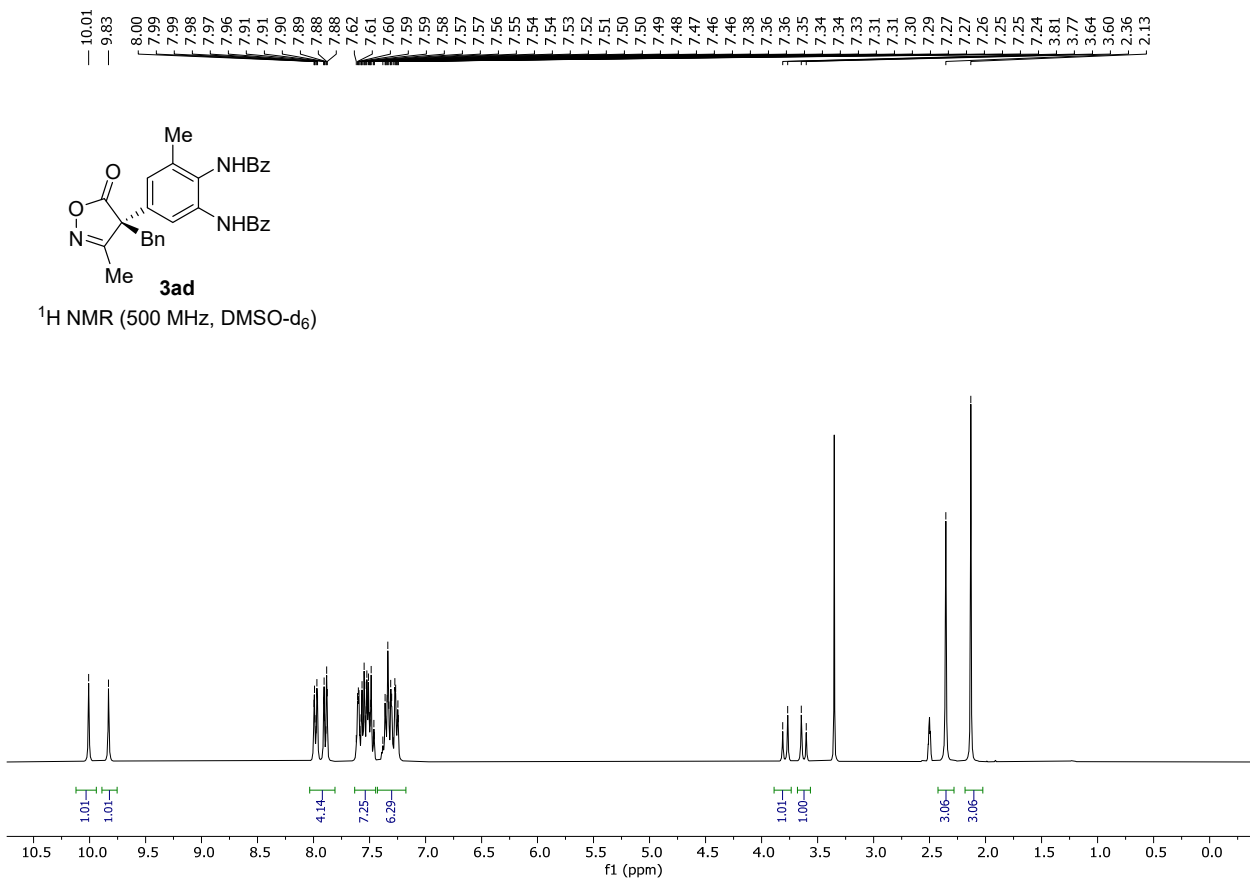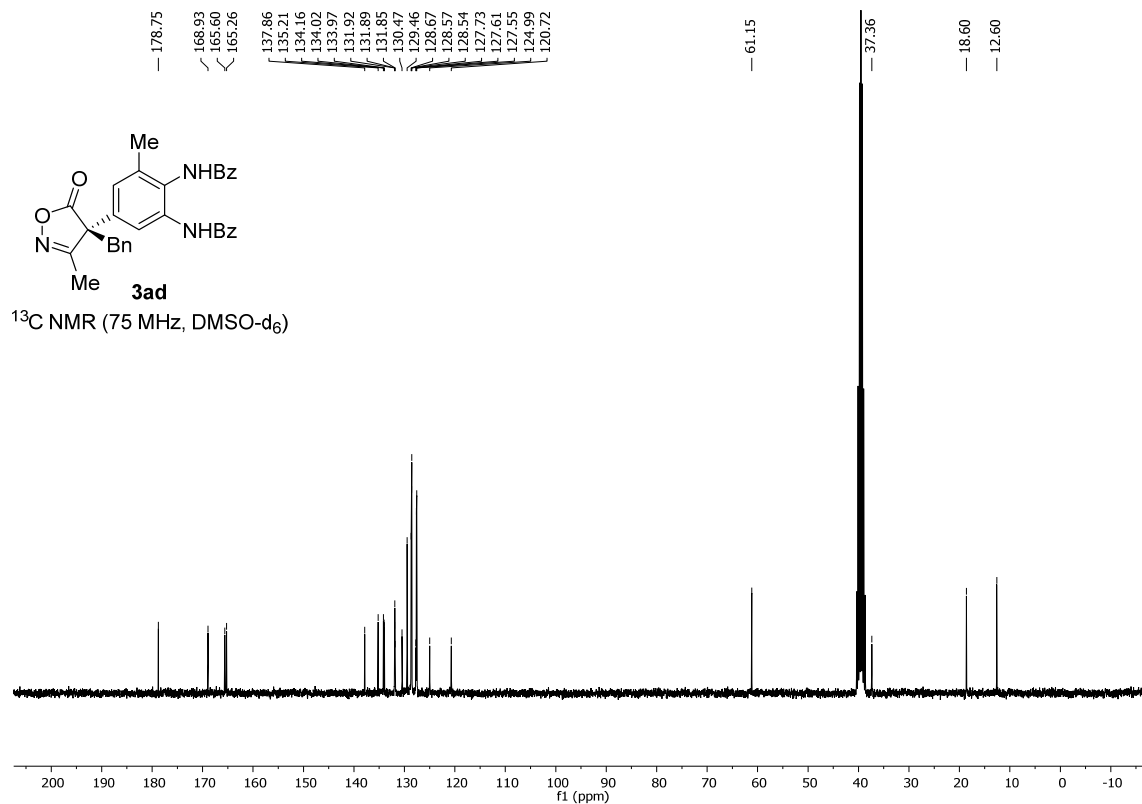

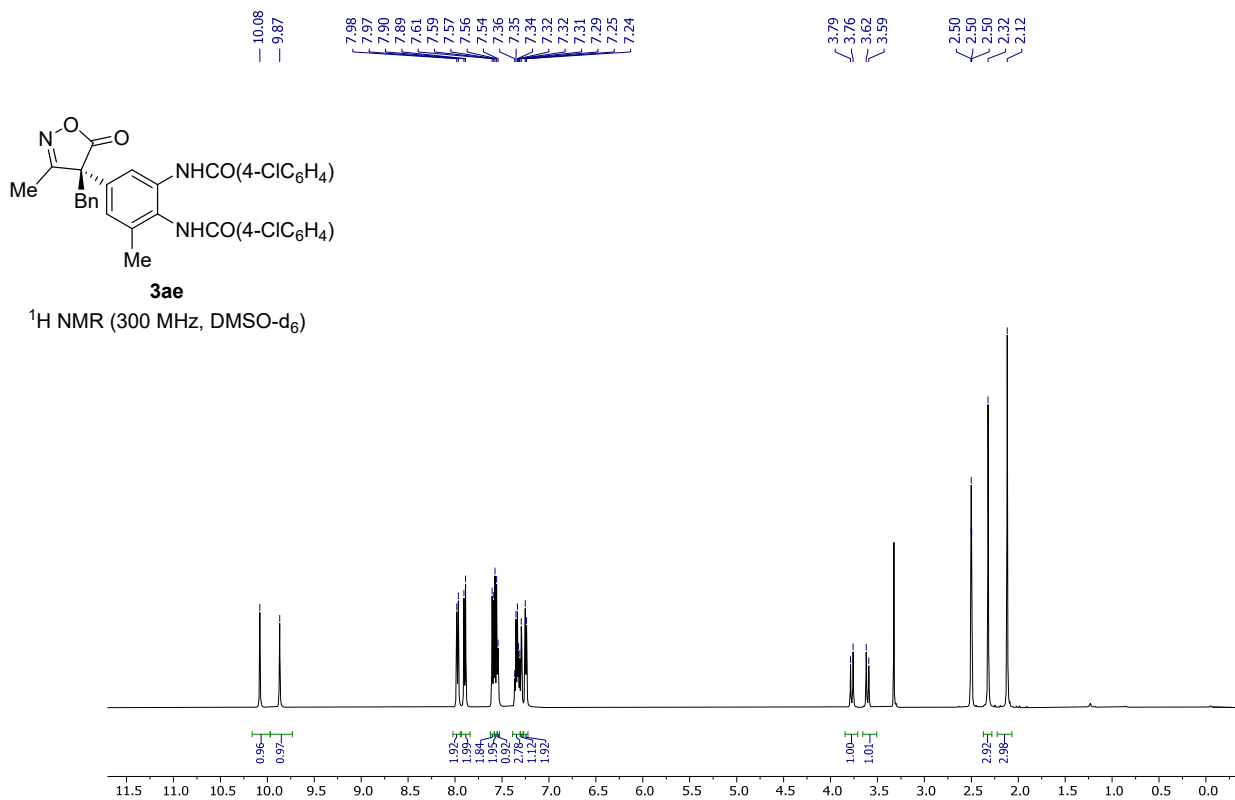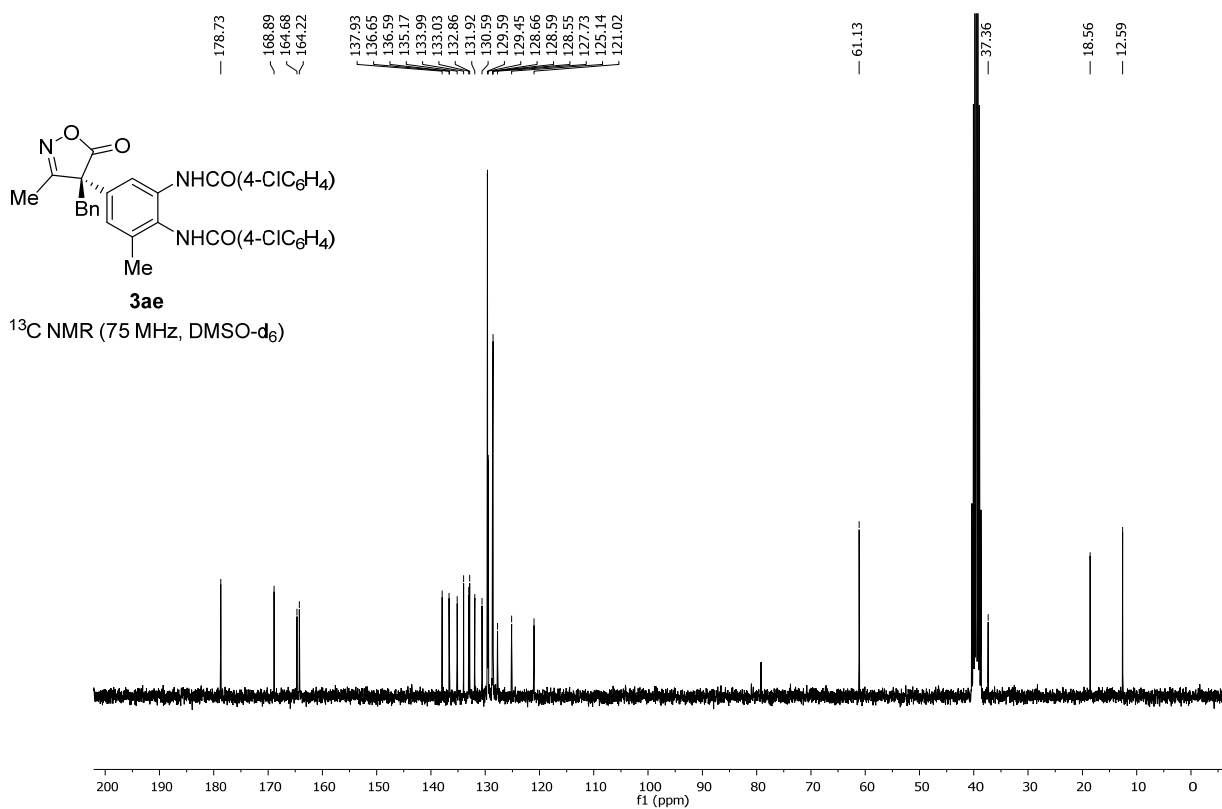



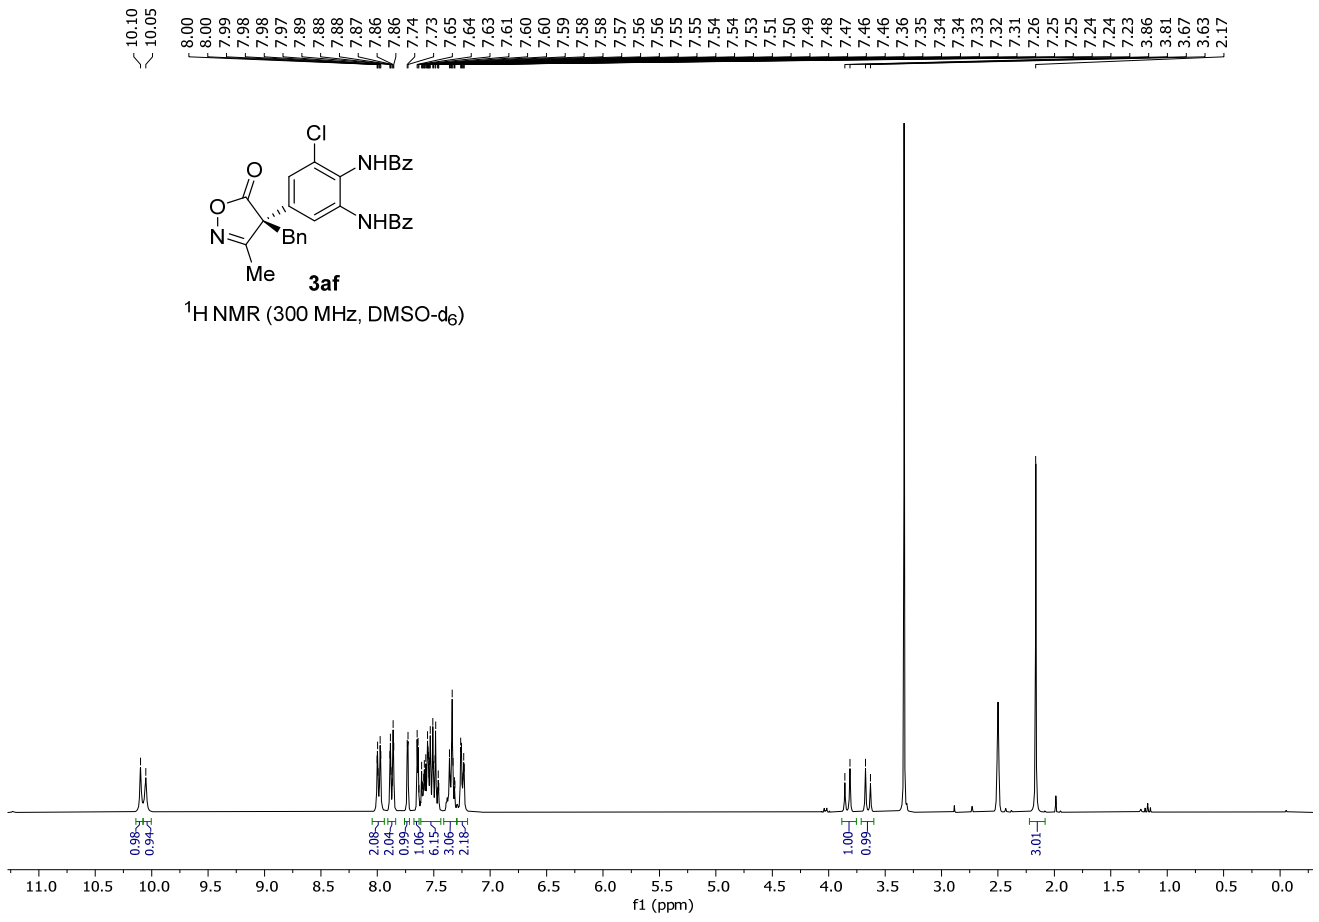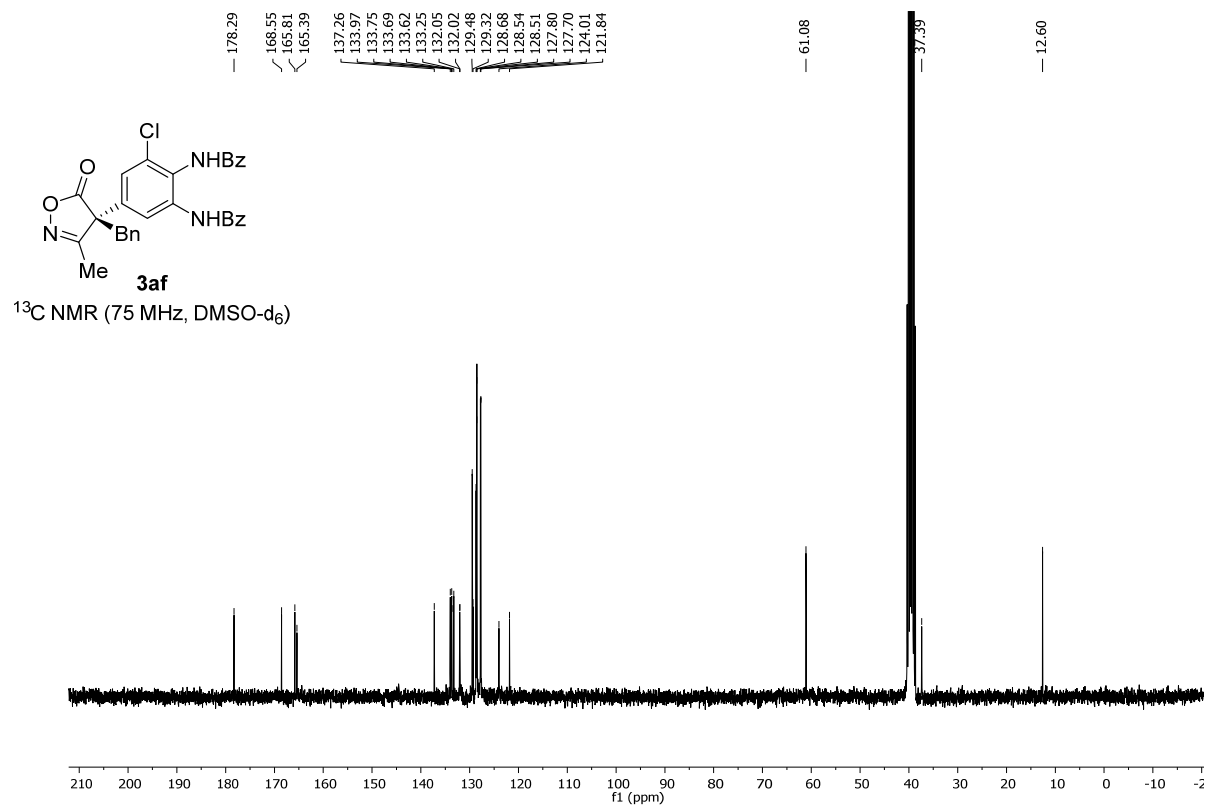

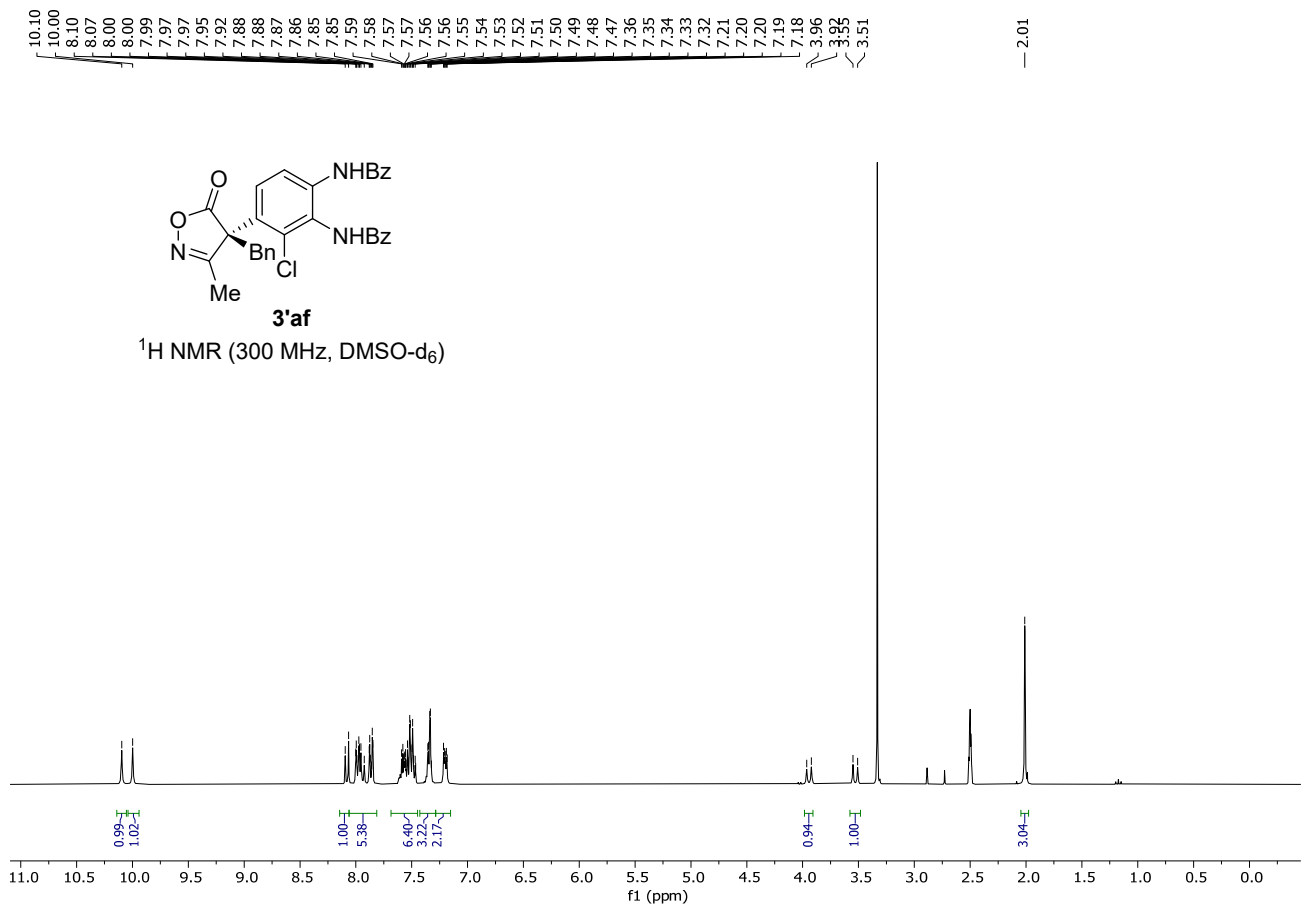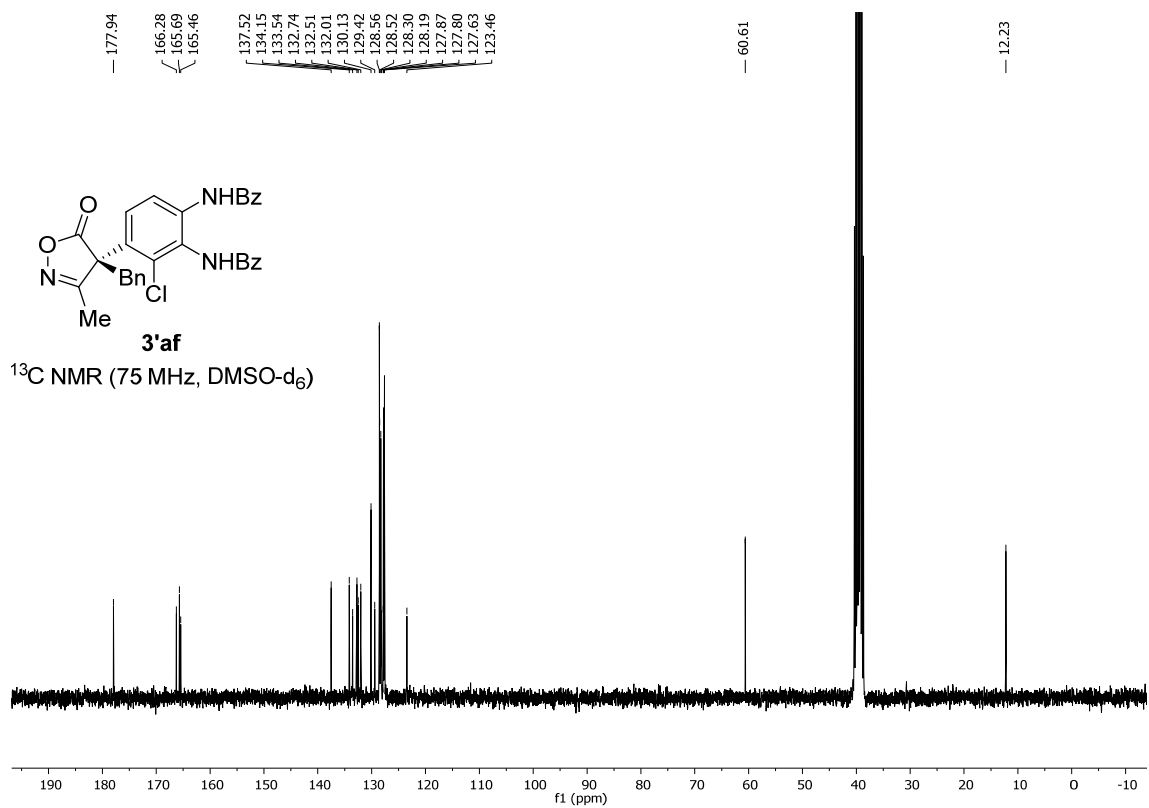

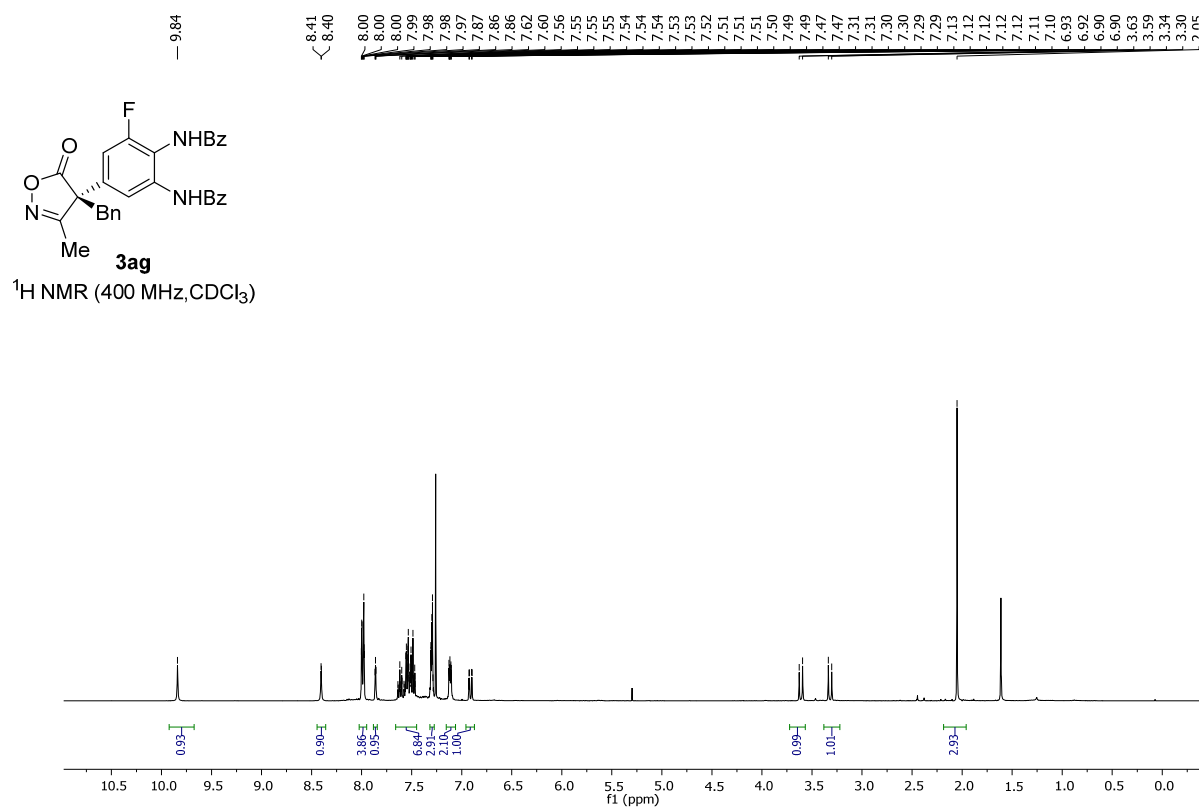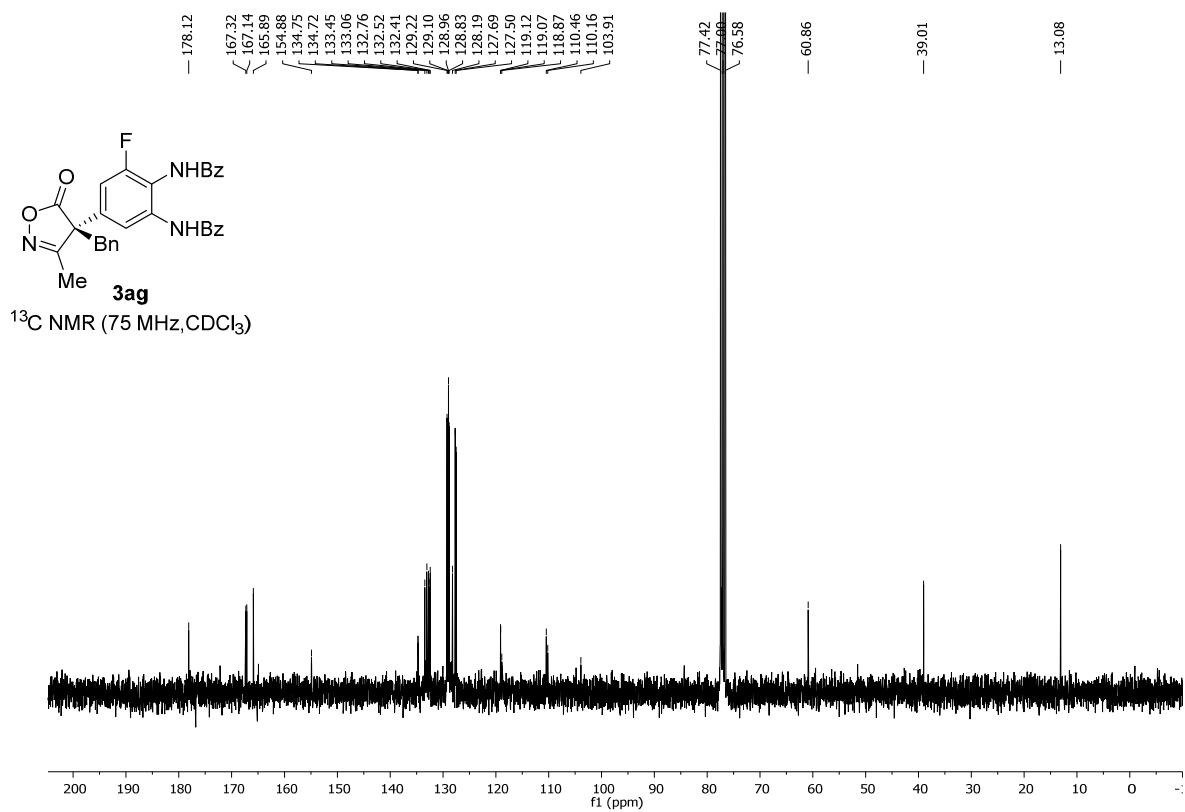

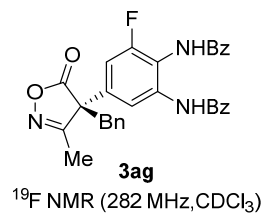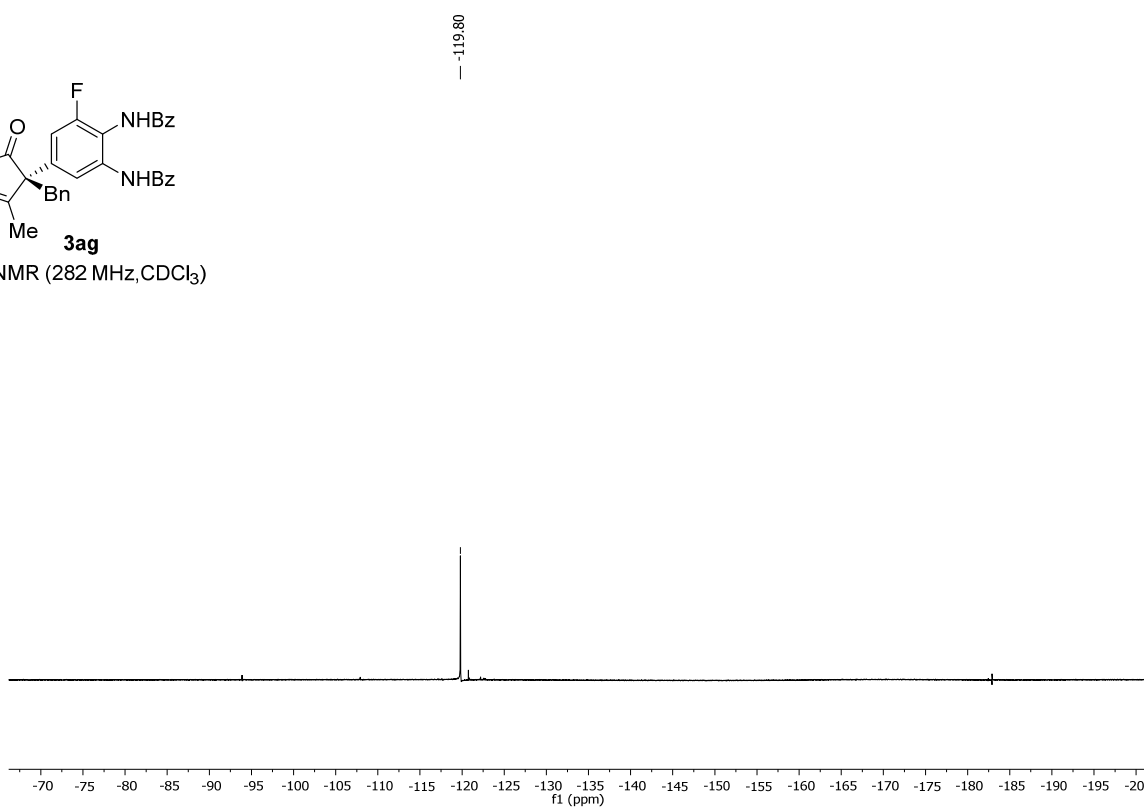

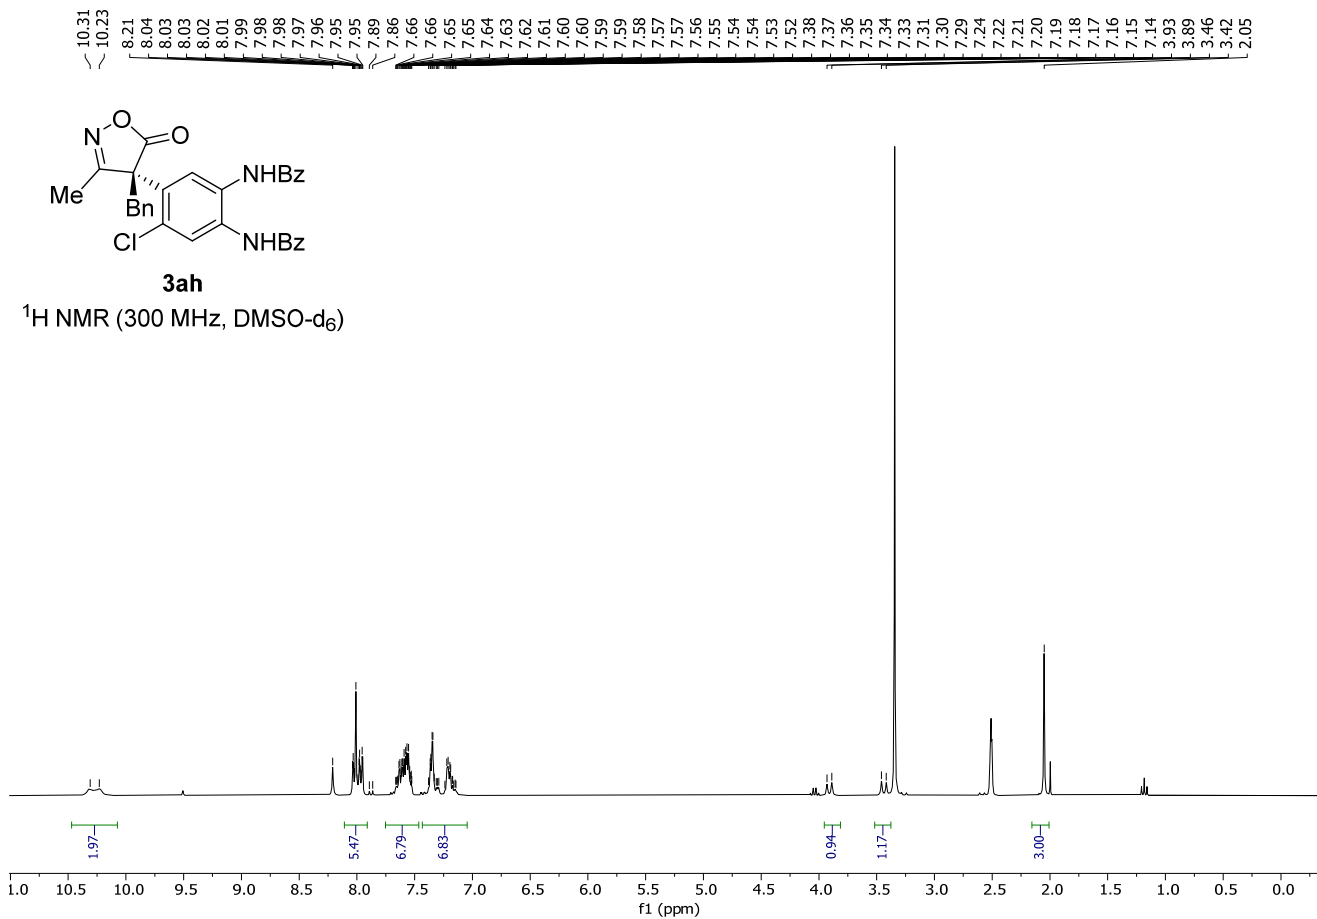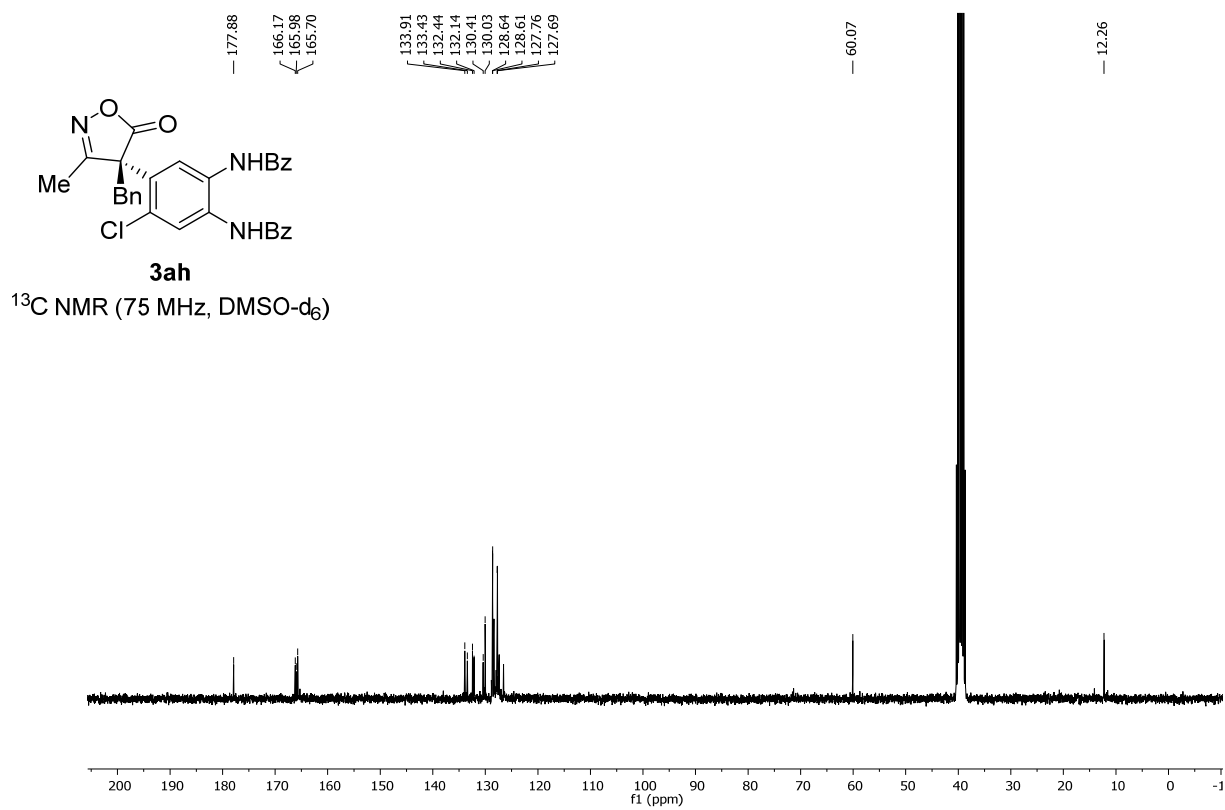

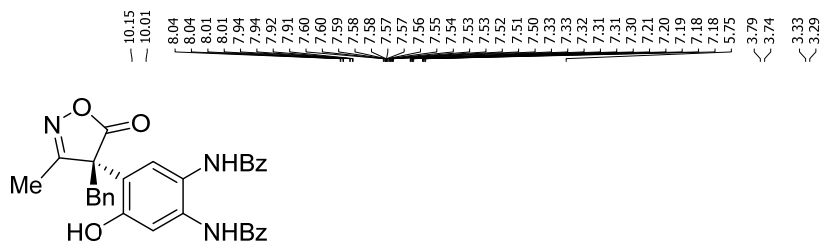

**3ai**  
<sup>1</sup>H NMR (300 MHz, DMSO-d<sub>6</sub>)

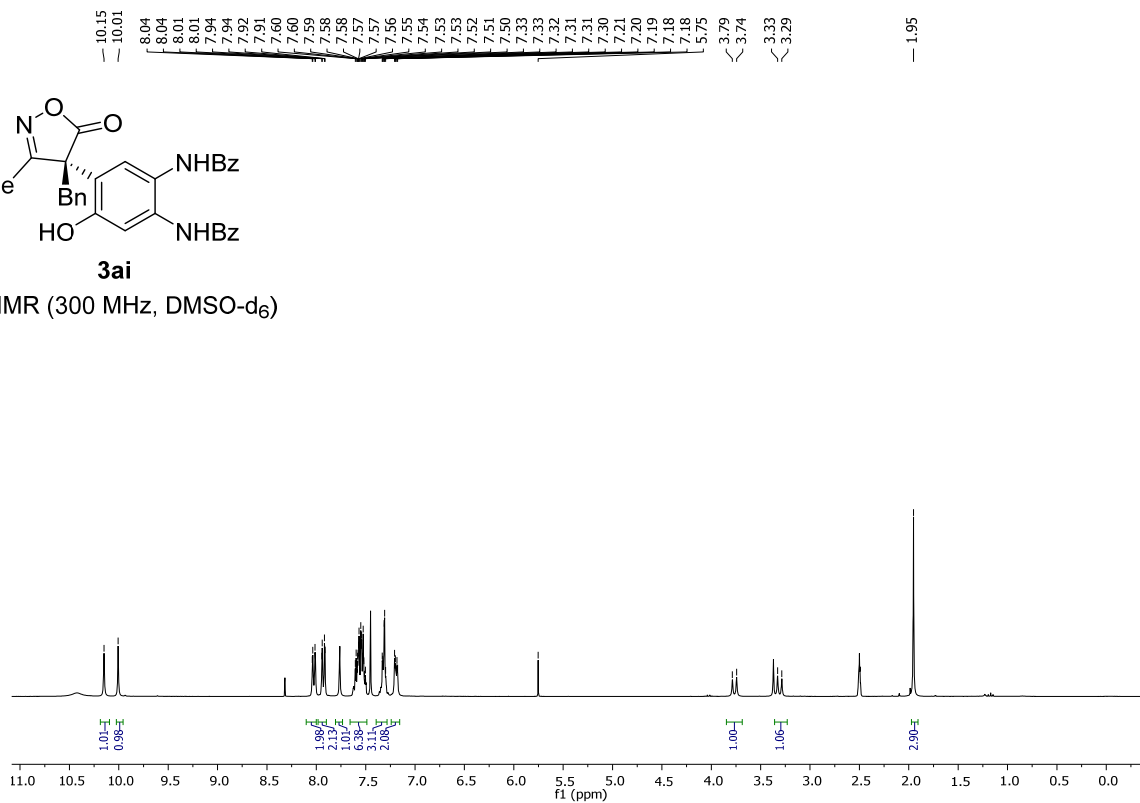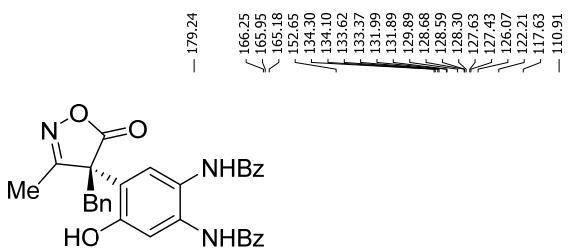

**3ai**  
<sup>13</sup>C NMR (75 MHz, DMSO-d<sub>6</sub>)

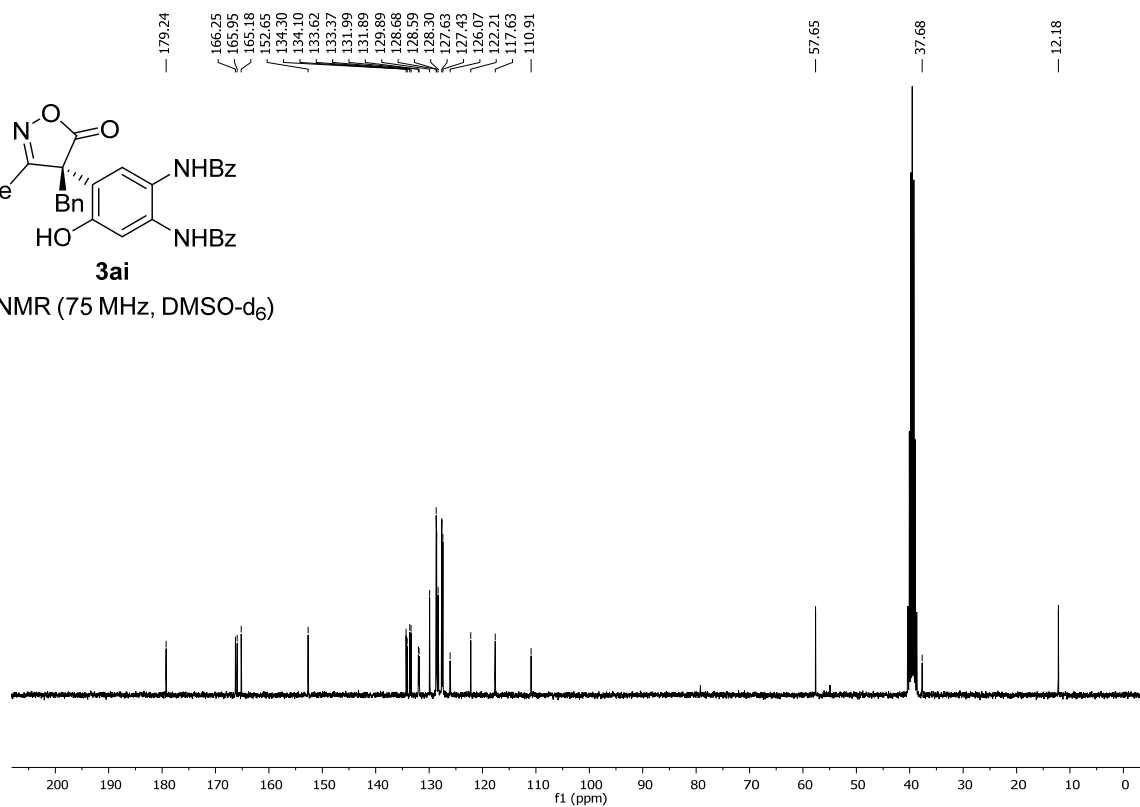

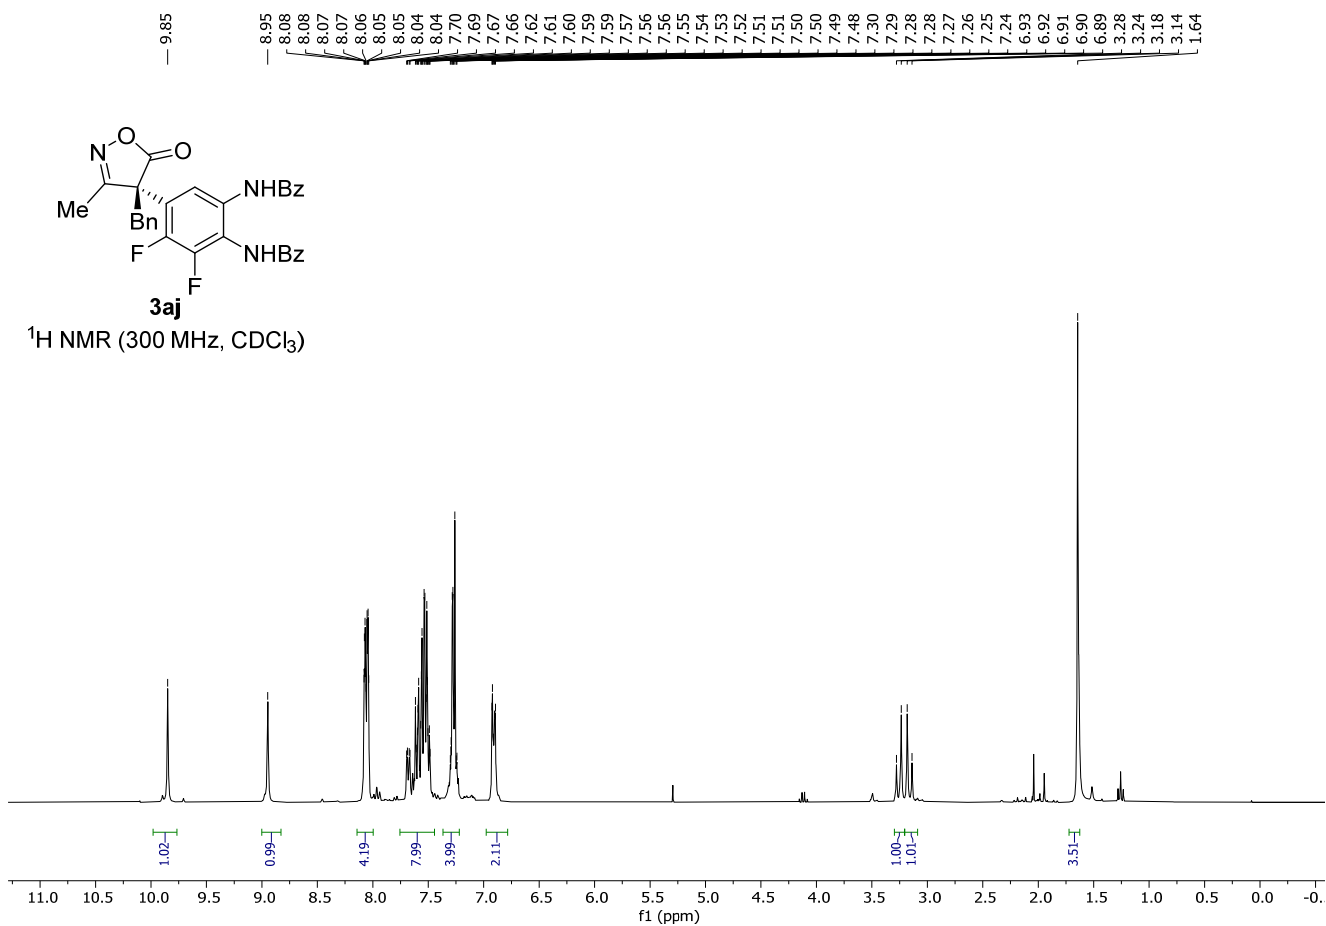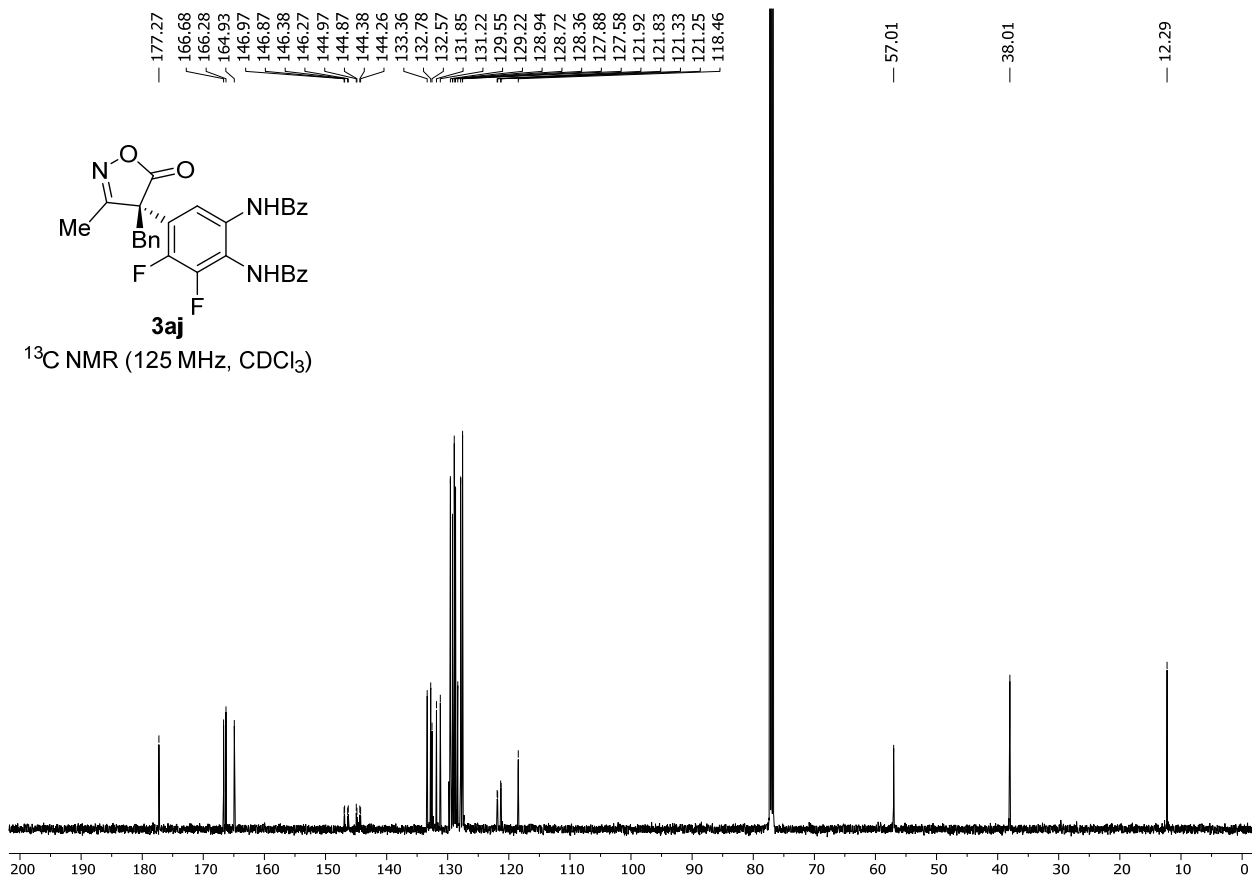

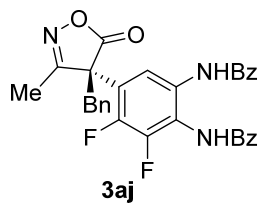

<sup>19</sup>F NMR (282 MHz, CDCl<sub>3</sub>)

-138.67  
-138.74  
-139.99

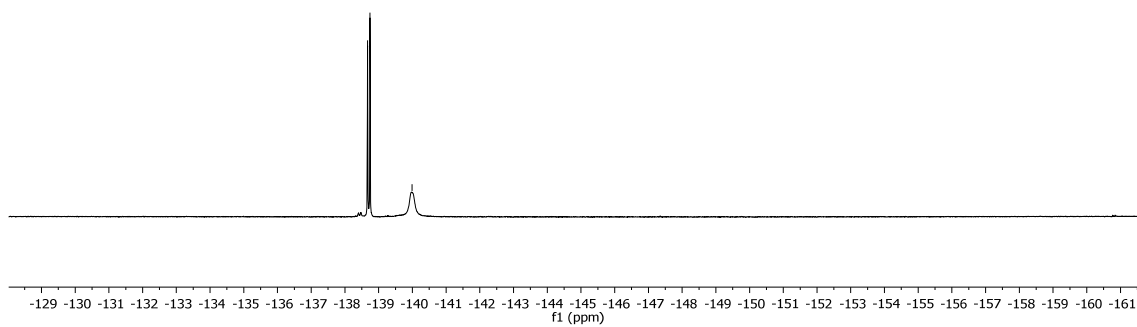



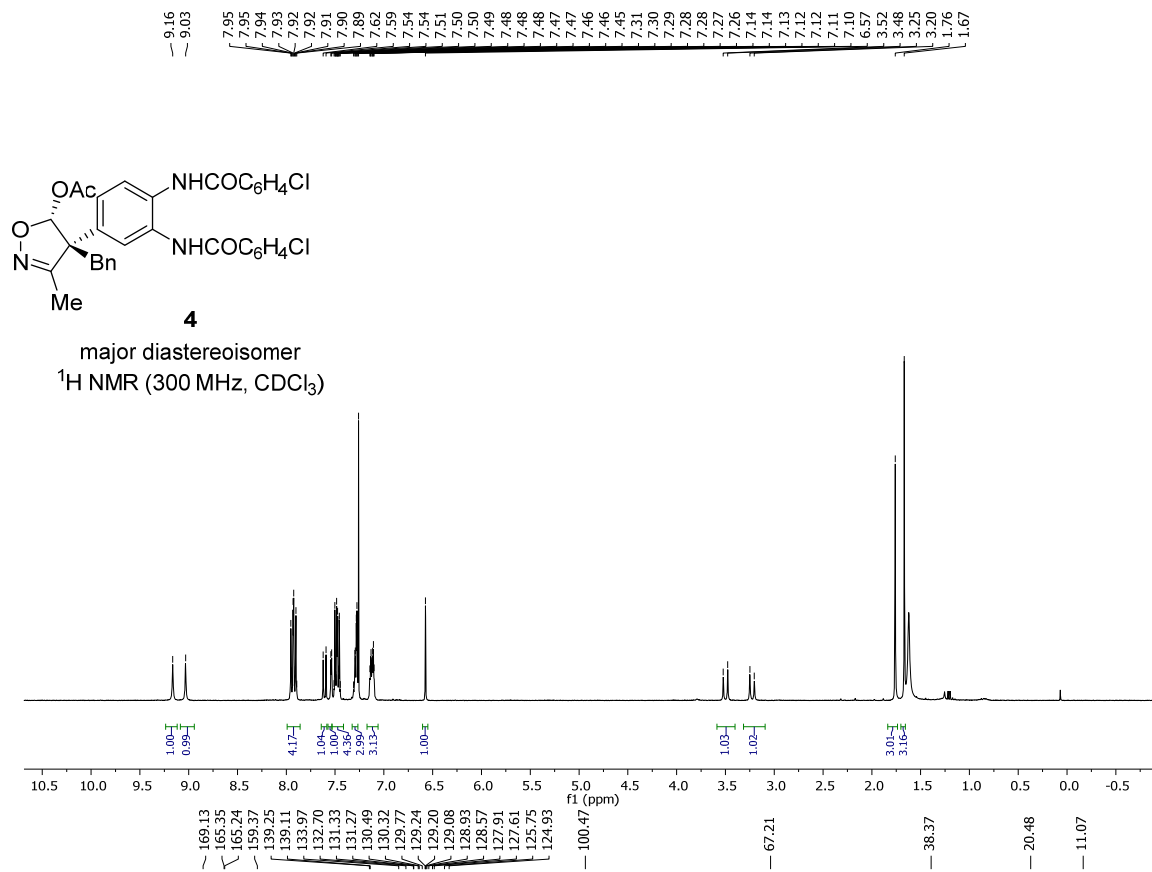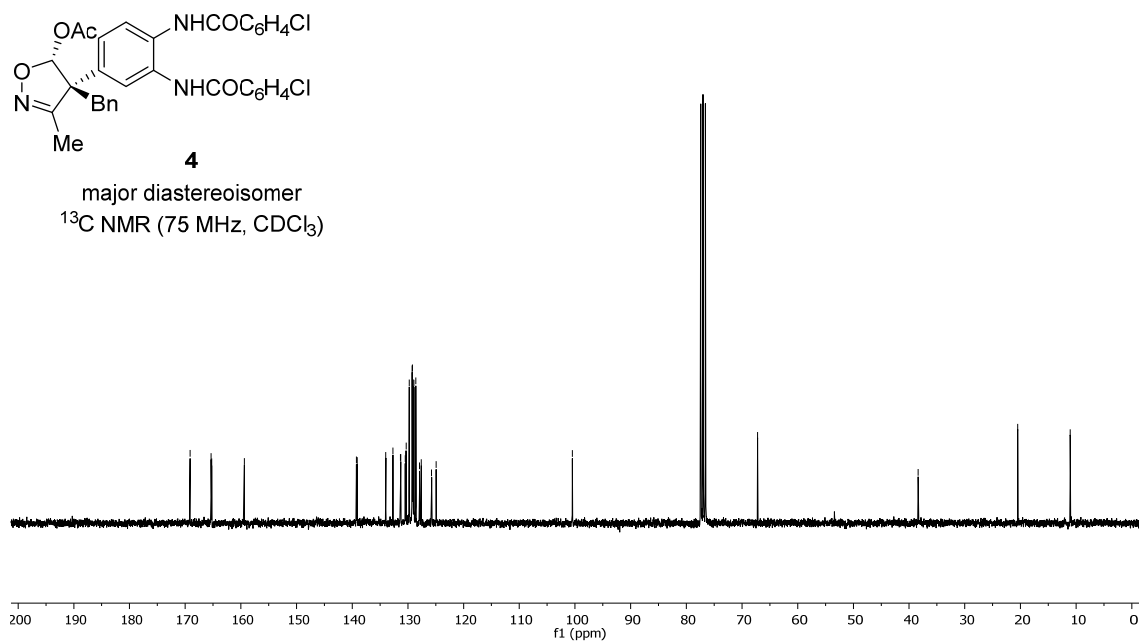

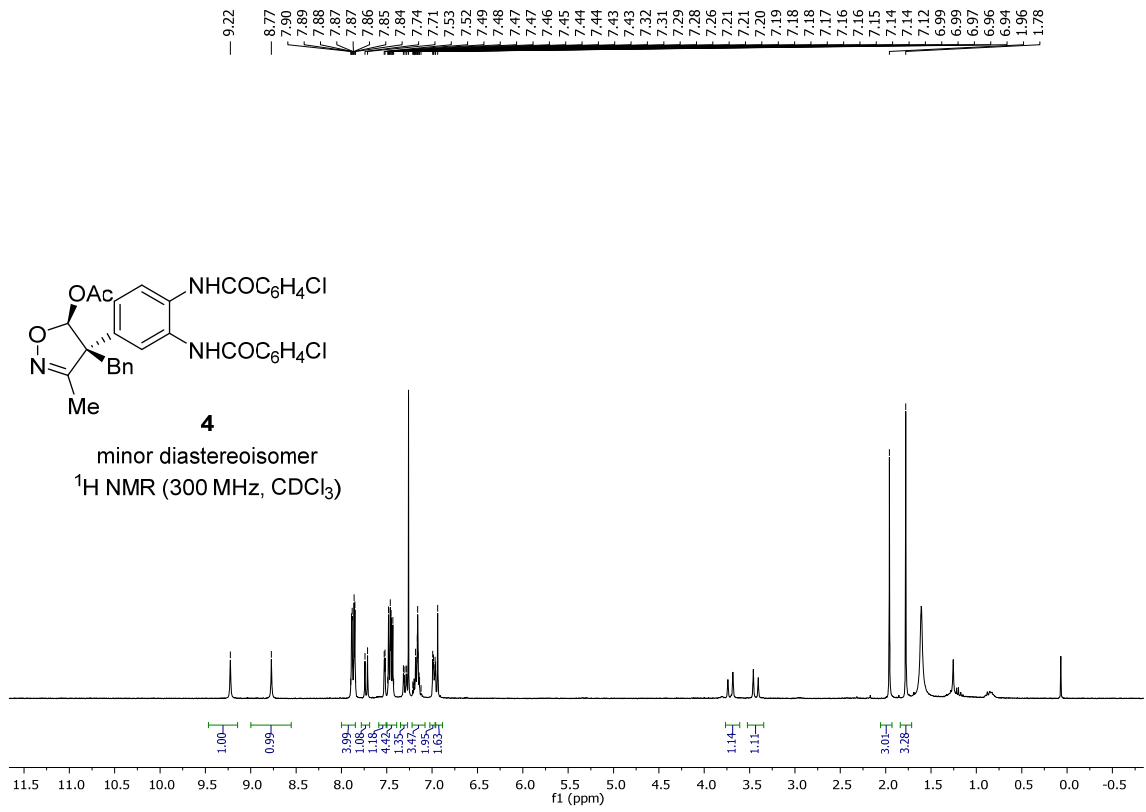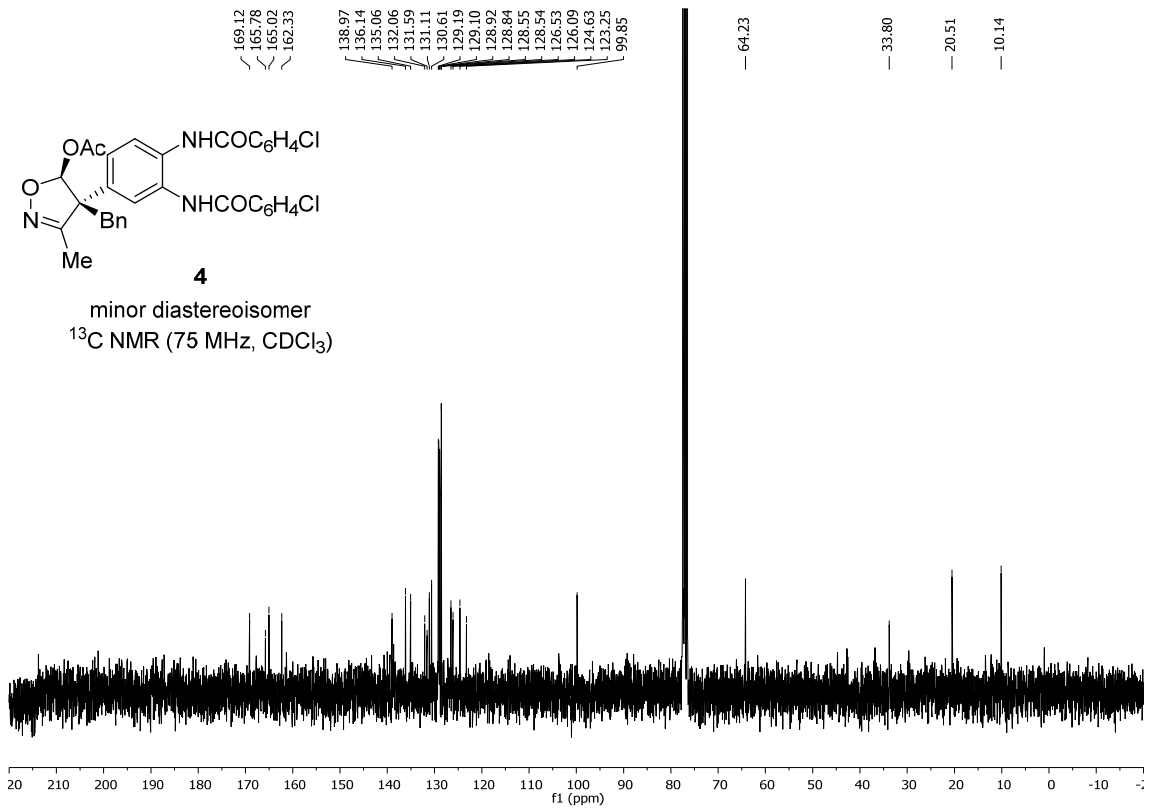

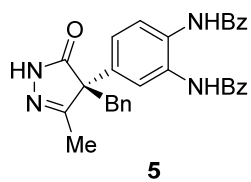

$^1\text{H NMR}$  (300 MHz,  $\text{CDCl}_3$ )

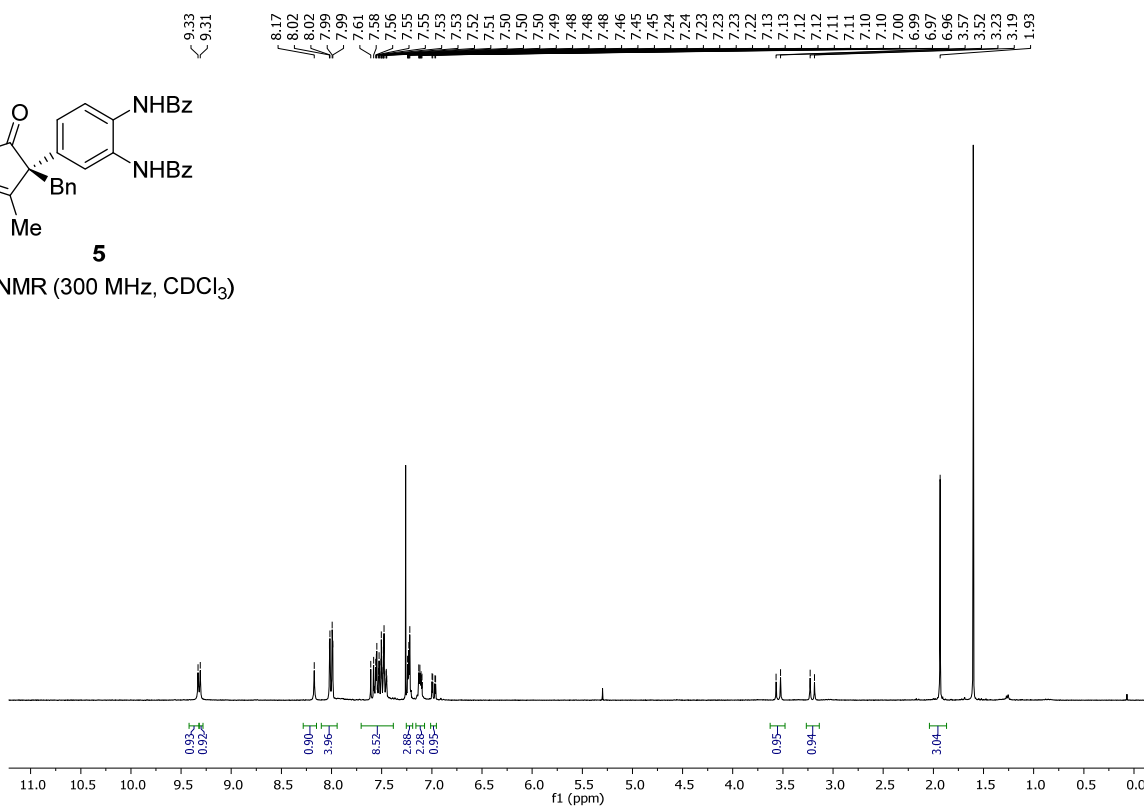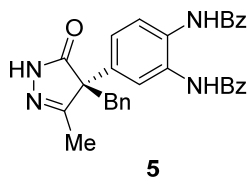

$^{13}\text{C NMR}$  (75 MHz,  $\text{CDCl}_3$ )

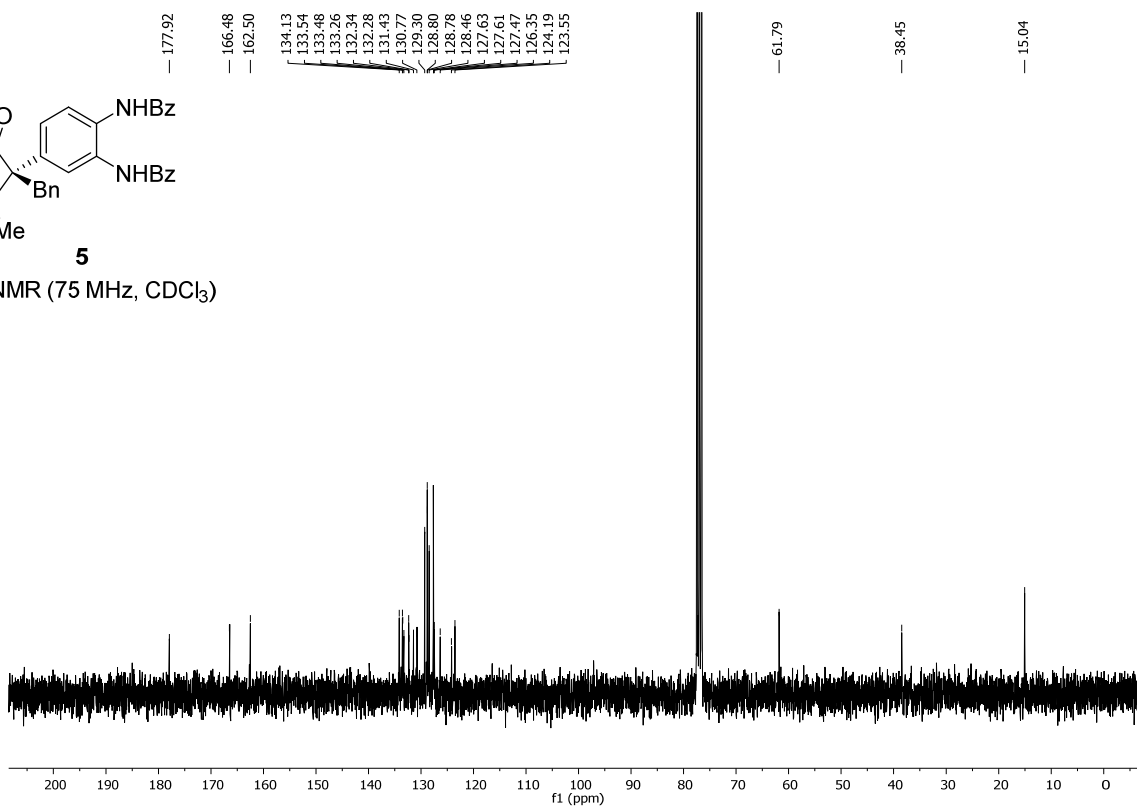

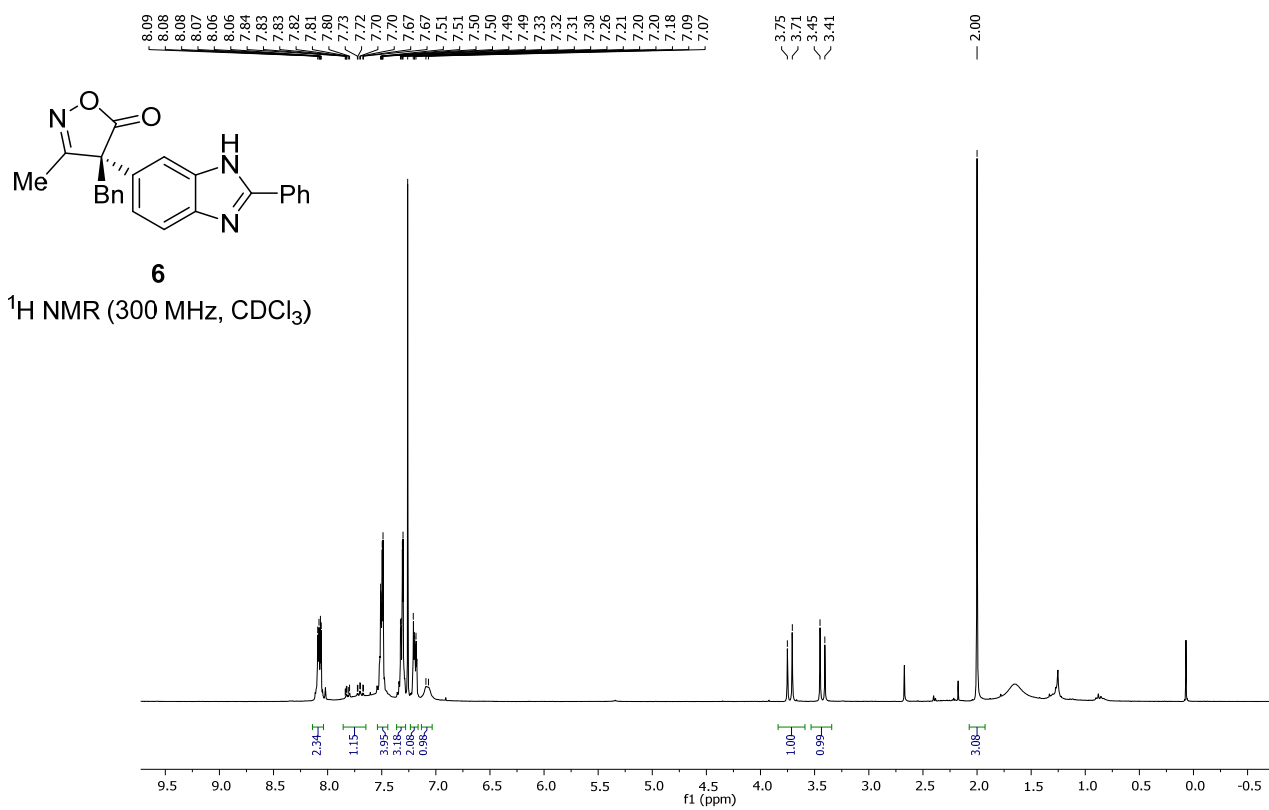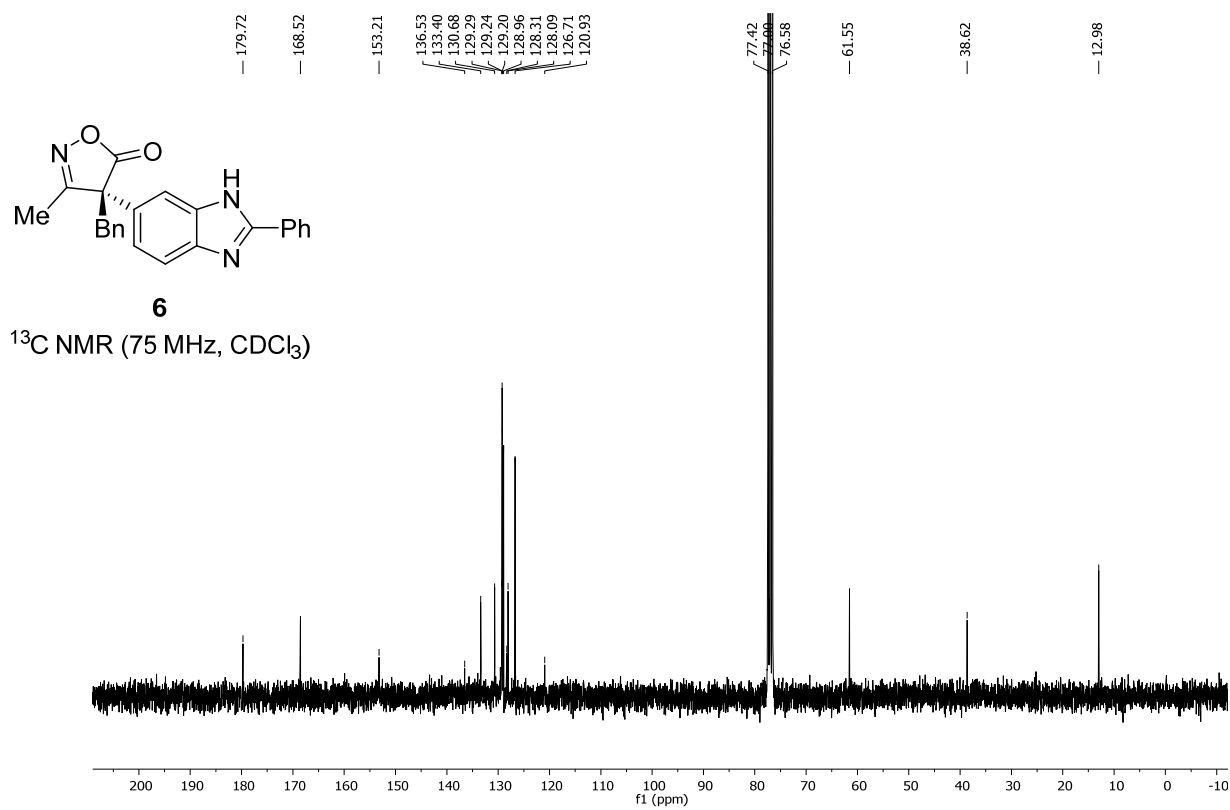

## HPLC traces for compounds 3-6

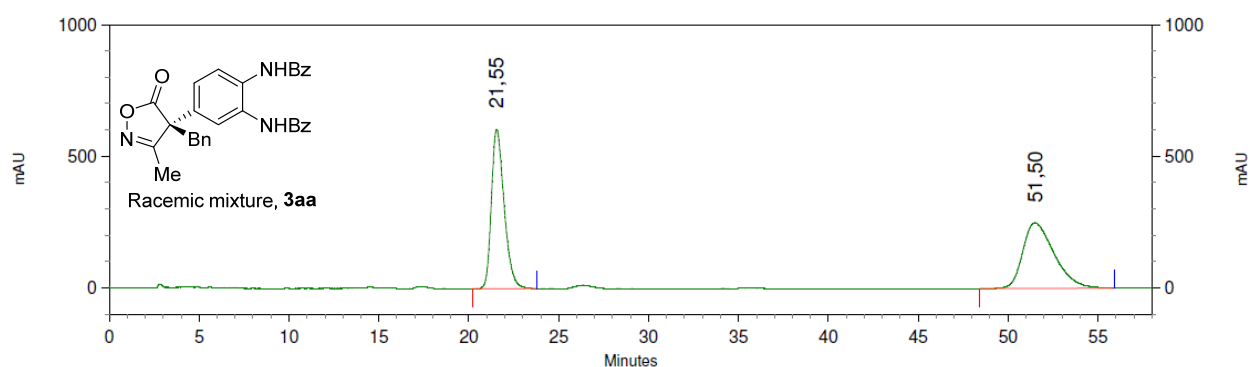

34: 250 nm, 4 nm

Results

| Retention Time | Area      | Area Percent |
|----------------|-----------|--------------|
| 21,55          | 119772187 | 49,759       |
| 51,50          | 120931288 | 50,241       |

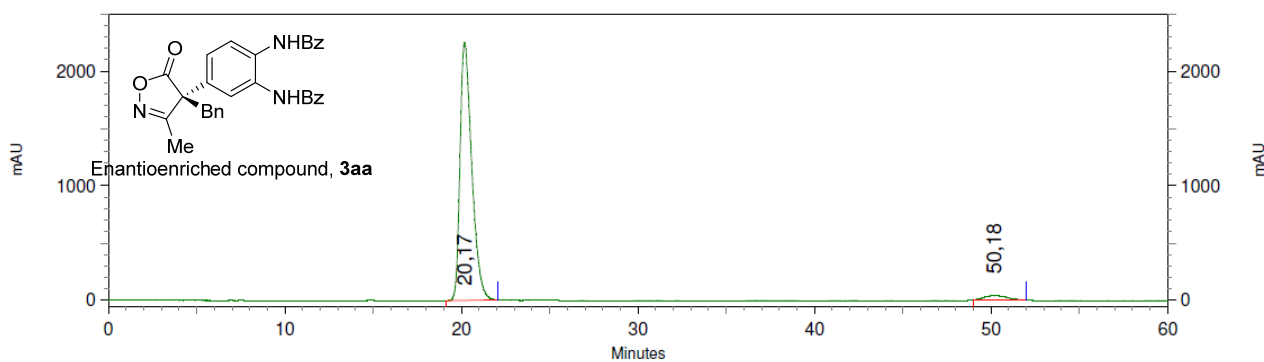

34: 250 nm, 4 nm

Results

| Retention Time | Area      | Area Percent |
|----------------|-----------|--------------|
| 20,17          | 416474475 | 96,527       |
| 50,18          | 14949349  | 3,465        |

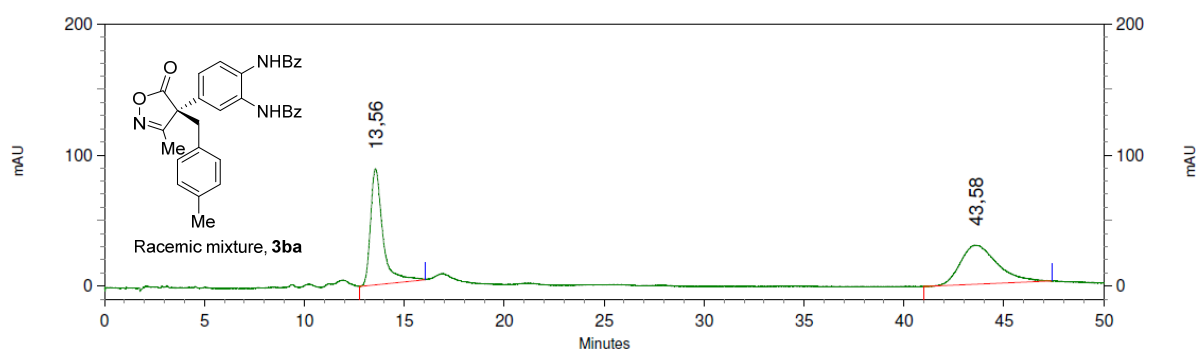

34: 250 nm, 4 nm

Results

| Retention Time | Area     | Area Percent |
|----------------|----------|--------------|
| 13,56          | 15217717 | 49,984       |
| 43,58          | 15227194 | 50,016       |

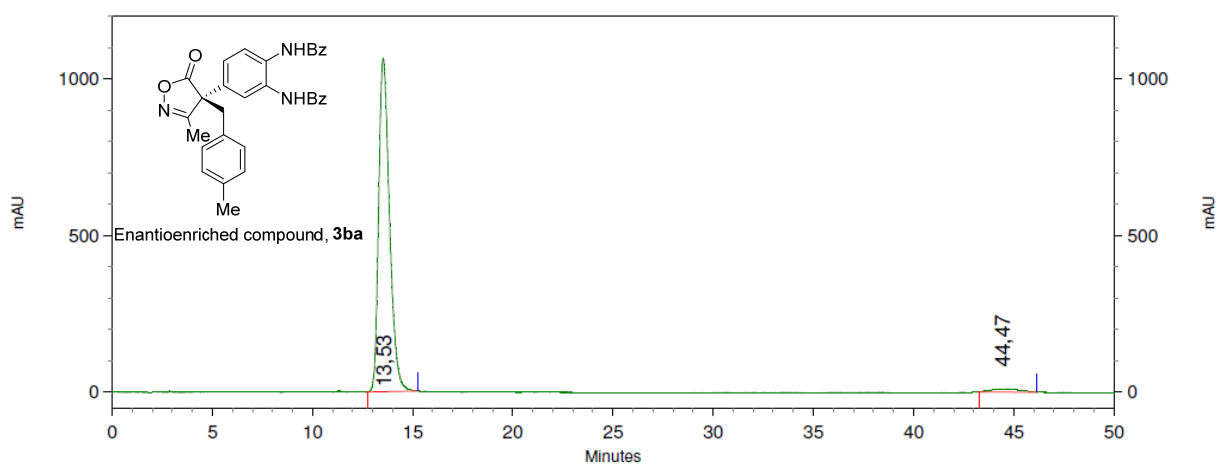

10: 250 nm, 4 nm

Results

| Retention Time | Area     | Area Percent |
|----------------|----------|--------------|
| 13,53          | 16002221 | 97,649       |
| 44,47          | 3853050  | 2,351        |

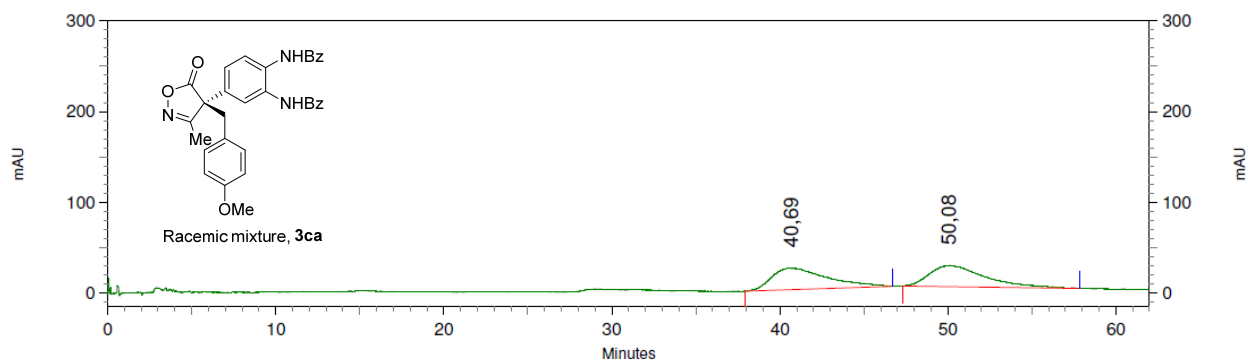

2: 250 nm, 4 nm Results

| Retention Time | Area     | Area Percent |
|----------------|----------|--------------|
| 40,69          | 21542445 | 50,244       |
| 50,08          | 21333517 | 49,756       |

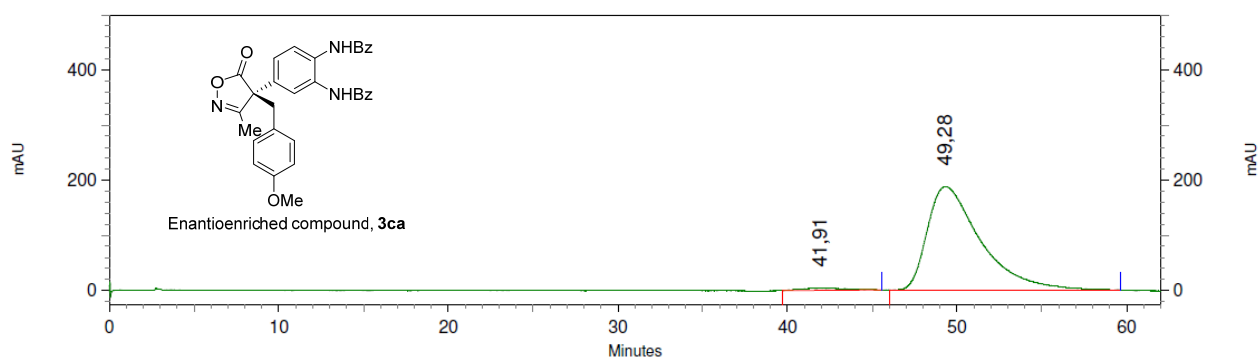

34: 250 nm, 4 nm Results

| Retention Time | Area      | Area Percent |
|----------------|-----------|--------------|
| 41,91          | 3013357   | 1,795        |
| 49,28          | 164889339 | 98,205       |

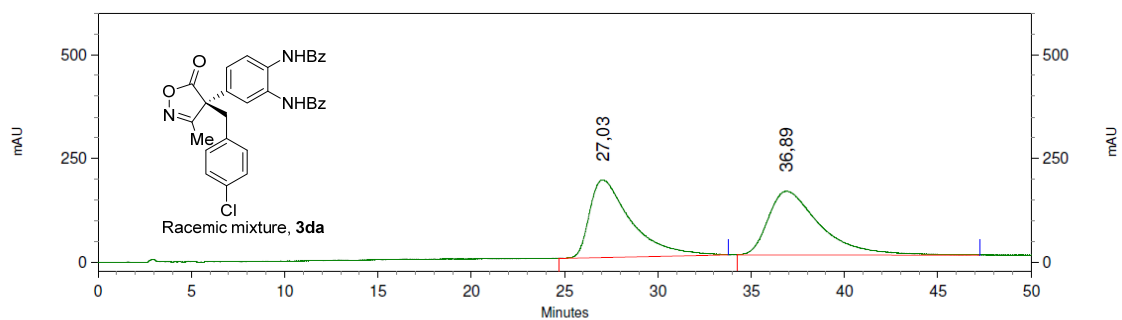

13: 230 nm, 4 nm

Results

| Retention Time | Area      | Area Percent |
|----------------|-----------|--------------|
| 27,03          | 115352062 | 49,407       |
| 36,89          | 118122321 | 50,593       |

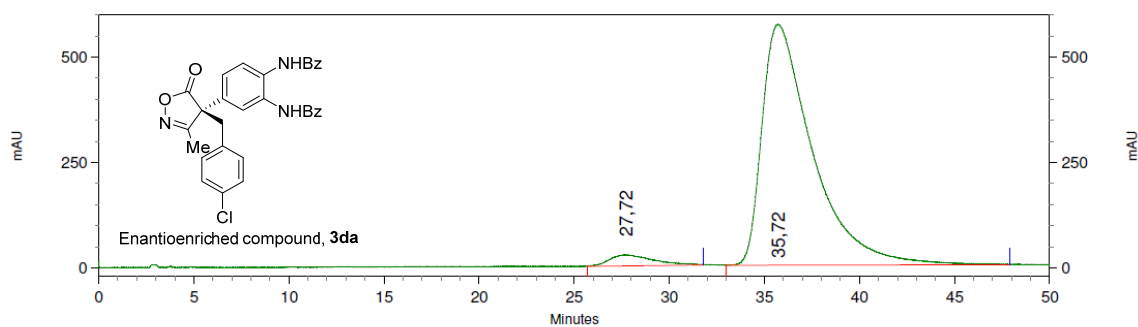

6: 230 nm, 4 nm Results

| Retention Time | Area      | Area Percent |
|----------------|-----------|--------------|
| 27,72          | 16323625  | 3,724        |
| 35,72          | 421997215 | 96,276       |



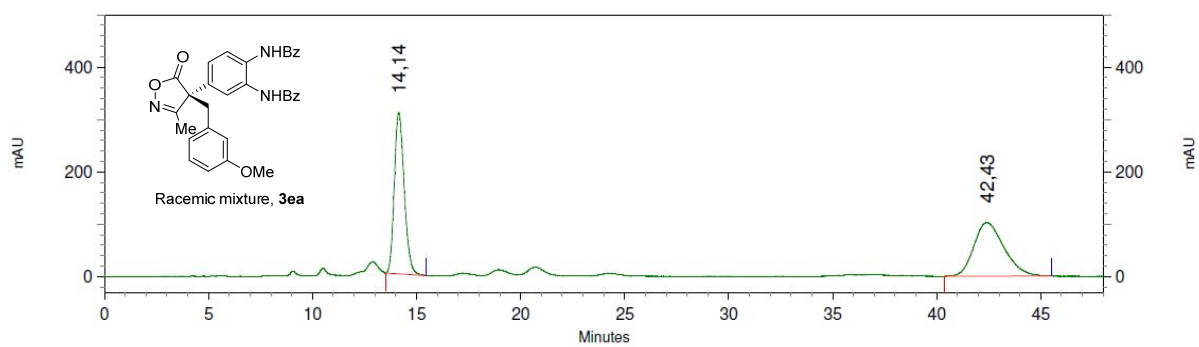

6: 274 nm, 4 nm Results

| Retention Time | Area     | Area Percent |
|----------------|----------|--------------|
| 14, 14         | 40760069 | 49, 716      |
| 42, 43         | 41226510 | 50, 284      |

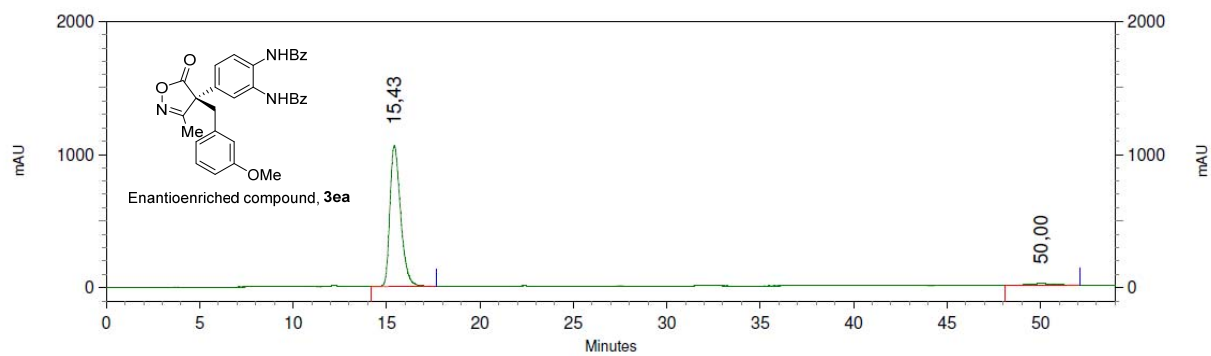

6: 274 nm, 4 nm Results

| Retention Time | Area      | Area Percent |
|----------------|-----------|--------------|
| 15, 43         | 168653655 | 96, 957      |
| 50, 00         | 5293816   | 3, 043       |

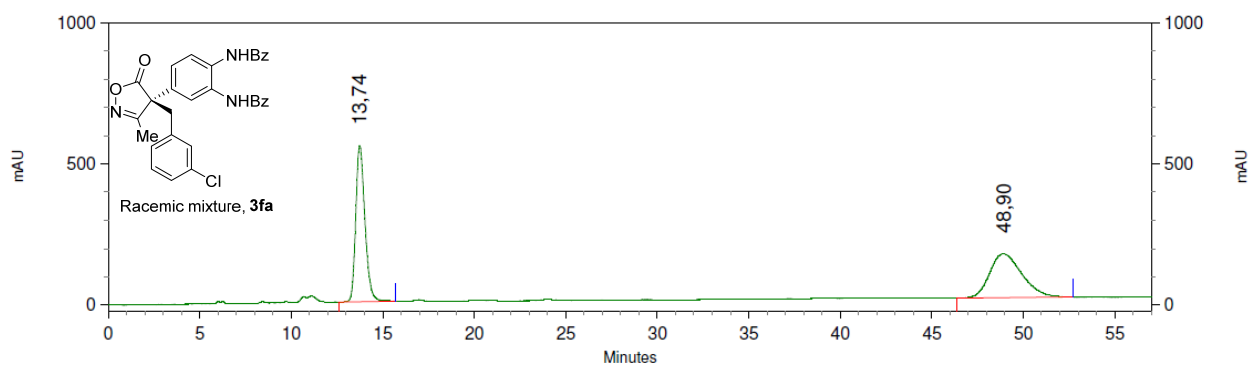

5: 258 nm, 4 nm Results

| Retention Time | Area     | Area Percent |
|----------------|----------|--------------|
| 13,74          | 77745321 | 50,532       |
| 48,90          | 76108570 | 49,468       |

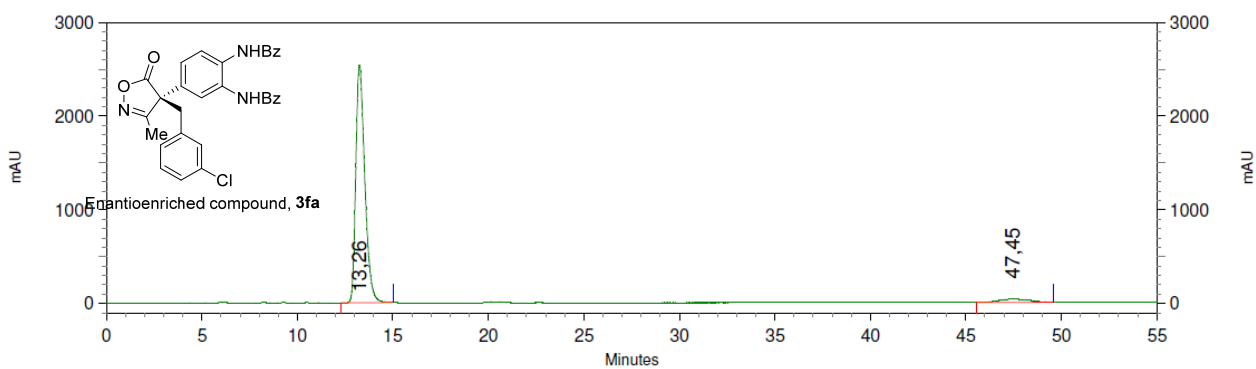

5: 258 nm, 4 nm Results

| Retention Time | Area      | Area Percent |
|----------------|-----------|--------------|
| 13,26          | 334410522 | 95,726       |
| 47,45          | 14932429  | 4,274        |

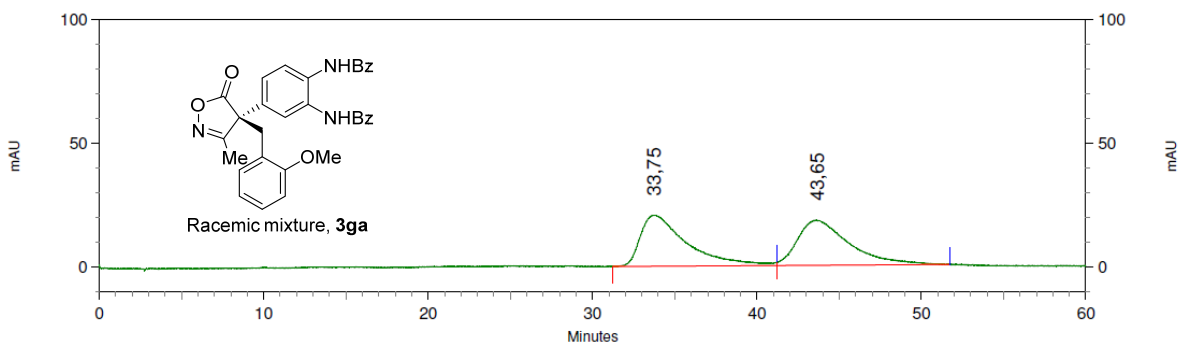

8: 300 nm, 4 nm Results

| Retention Time | Area     | Area Percent |
|----------------|----------|--------------|
| 33,75          | 16089537 | 50,418       |
| 43,65          | 15822833 | 49,582       |

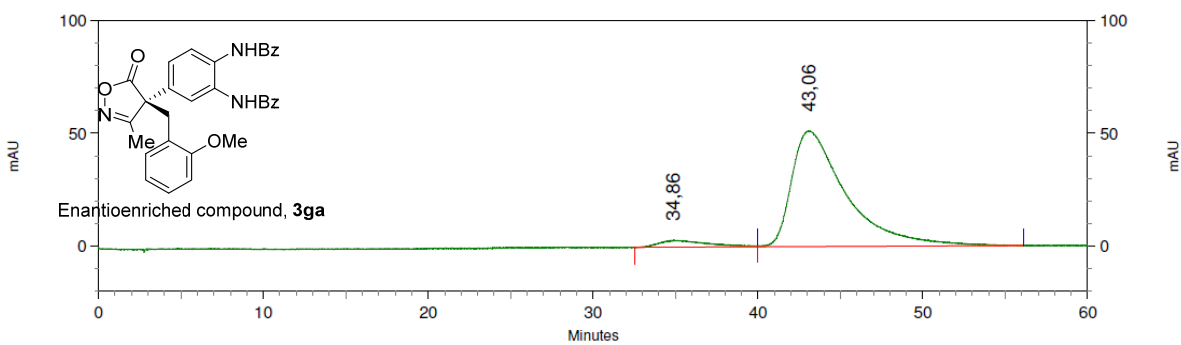

8: 300 nm, 4 nm Results

| Retention Time | Area     | Area Percent |
|----------------|----------|--------------|
| 34,86          | 2474679  | 4,989        |
| 43,06          | 47126753 | 95,011       |

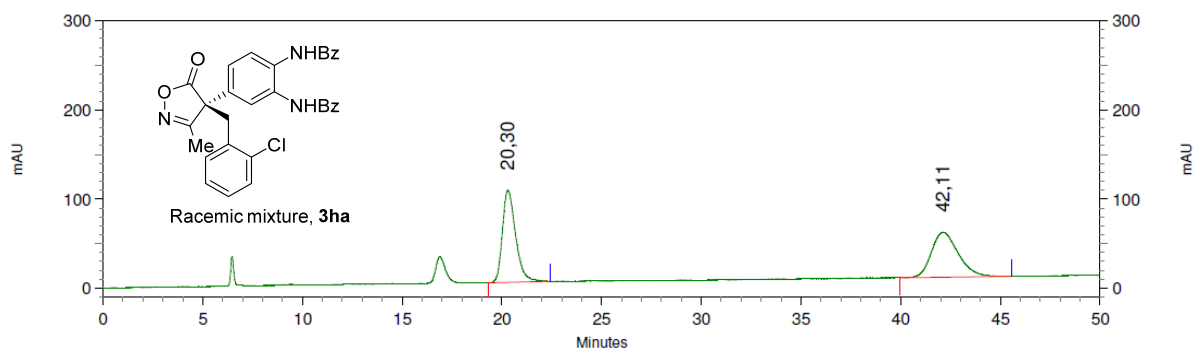

60: 292 nm, 4 nm

Results

| Retention Time | Area     | Area Percent |
|----------------|----------|--------------|
| 20,30          | 19039349 | 49,934       |
| 42,11          | 19090022 | 50,066       |

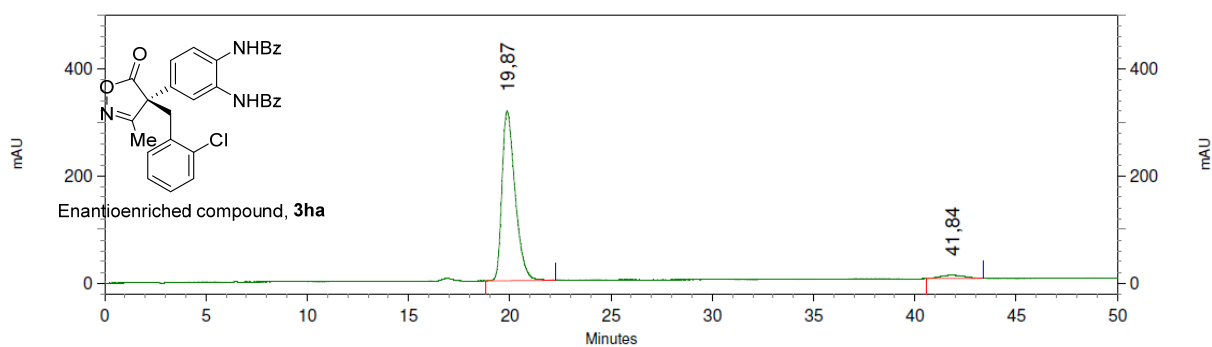

60: 292 nm, 4 nm

Results

| Retention Time | Area     | Area Percent |
|----------------|----------|--------------|
| 19,87          | 56968349 | 96,600       |
| 41,84          | 2004829  | 3,400        |

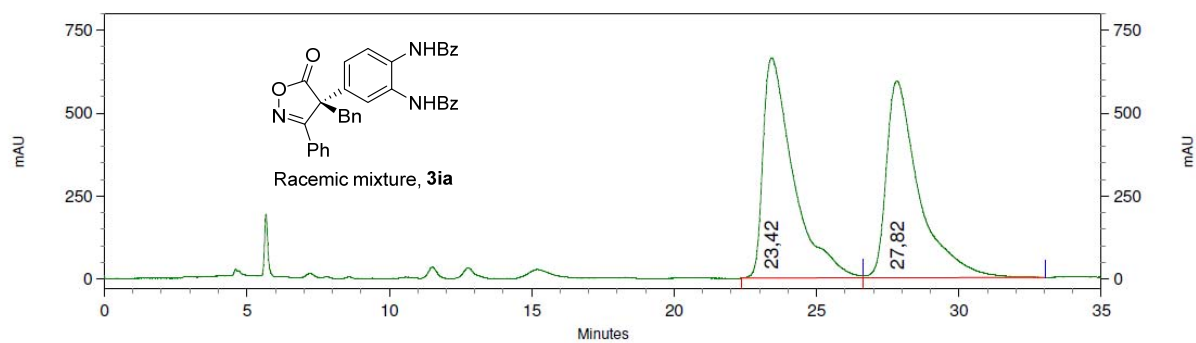

13: 260 nm, 4 nm  
Results

| Retention Time | Area      | Area Percent |
|----------------|-----------|--------------|
| 23,42          | 196474641 | 50,929       |
| 27,82          | 189310414 | 49,071       |

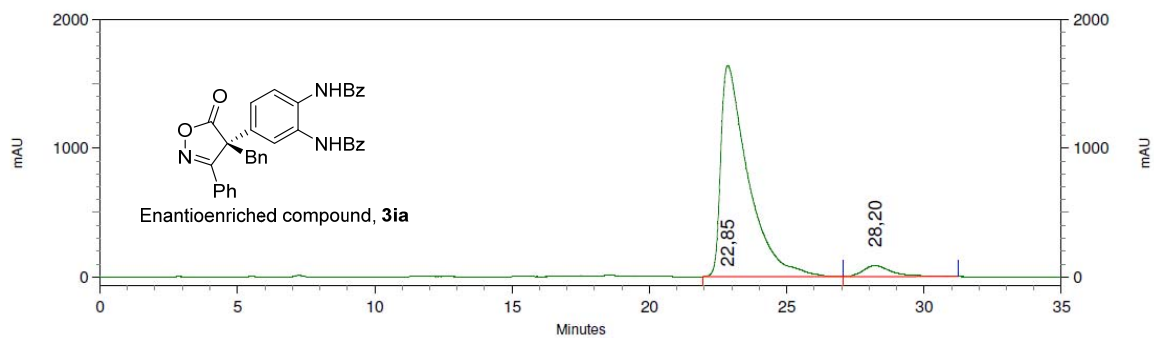

13: 260 nm, 4 nm  
Results

| Retention Time | Area      | Area Percent |
|----------------|-----------|--------------|
| 22,85          | 454488490 | 94,653       |
| 28,20          | 25675268  | 5,347        |

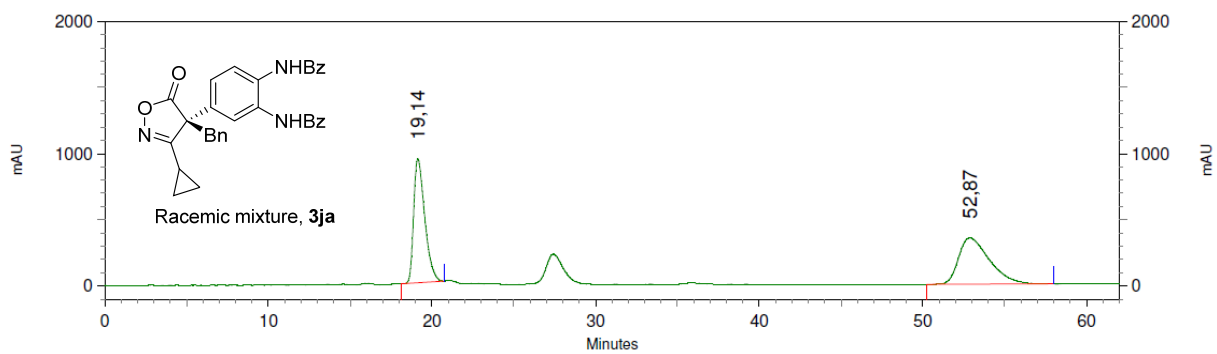

2: 229 nm, 4 nm Results

| Retention Time | Area      | Area Percent |
|----------------|-----------|--------------|
| 19,14          | 176536963 | 49,052       |
| 52,87          | 183360544 | 50,948       |

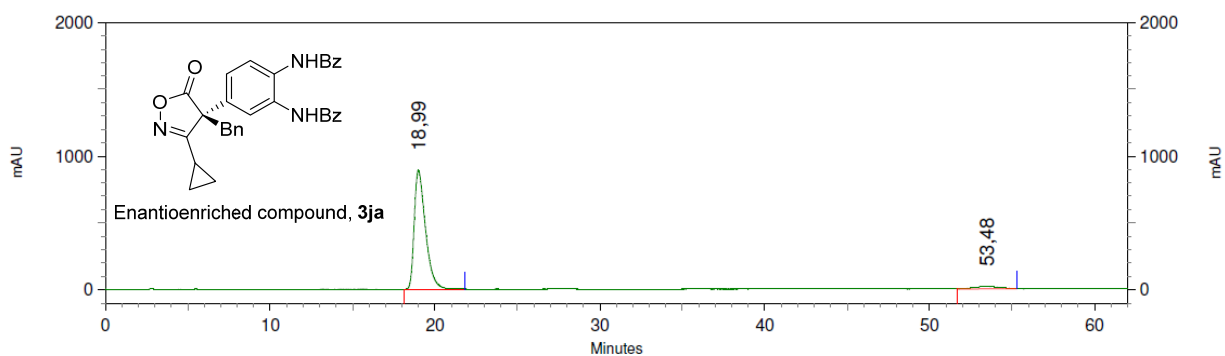

2: 229 nm, 4 nm Results

| Retention Time | Area      | Area Percent |
|----------------|-----------|--------------|
| 18,99          | 168341233 | 95,363       |
| 53,48          | 8185635   | 4,637        |

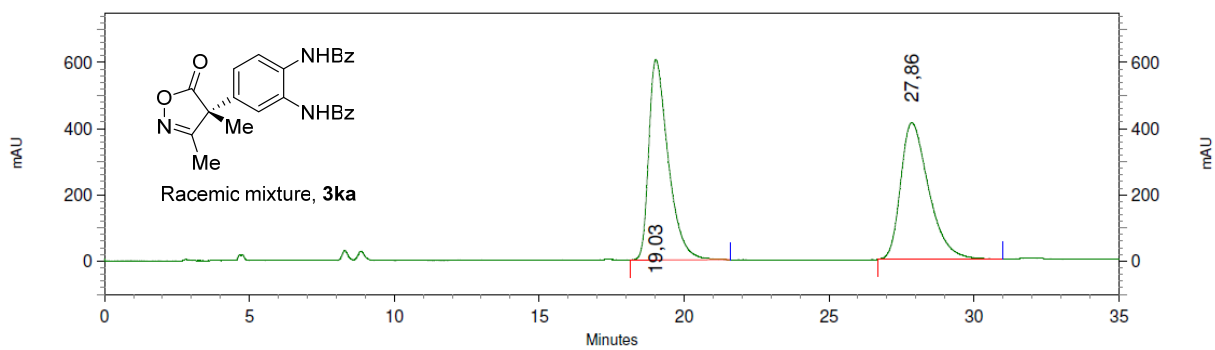

34: 250 nm, 4 nm  
Results

| Retention Time | Area      | Area Percent |
|----------------|-----------|--------------|
| 19,03          | 113044558 | 50,345       |
| 27,86          | 111494769 | 49,655       |

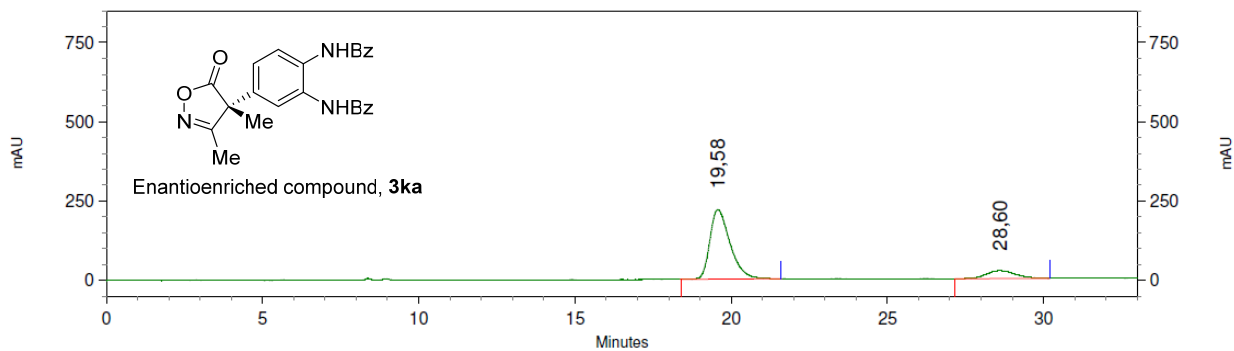

34: 250 nm, 4 nm  
Results

| Retention Time | Area     | Area Percent |
|----------------|----------|--------------|
| 19,58          | 39579031 | 85,741       |
| 28,60          | 6582371  | 14,259       |

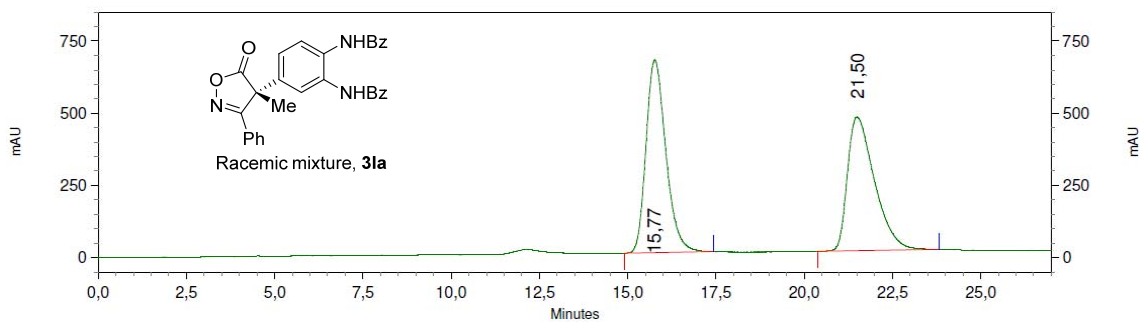

38: 258 nm, 4 nm

Results

| Retention Time | Area      | Area Percent |
|----------------|-----------|--------------|
| 15,77          | 104568023 | 51,534       |
| 21,50          | 98343557  | 48,466       |

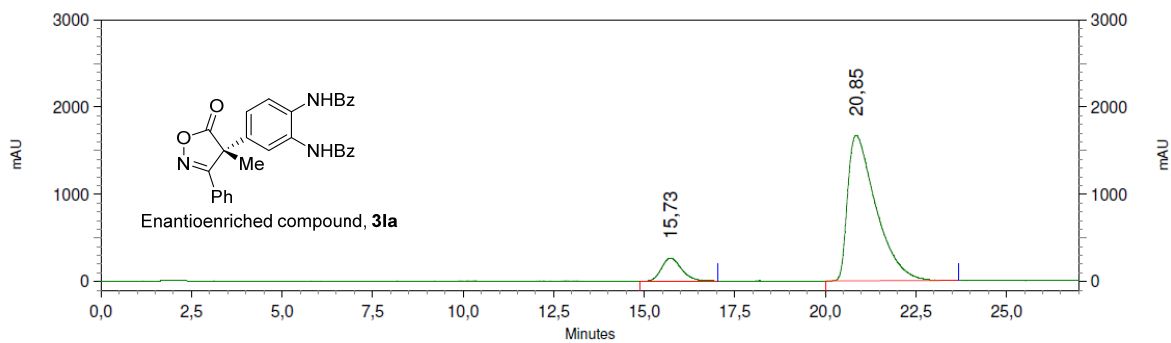

38: 258 nm, 4 nm

Results

| Retention Time | Area      | Area Percent |
|----------------|-----------|--------------|
| 15,73          | 40183605  | 9,972        |
| 20,85          | 362767420 | 90,028       |



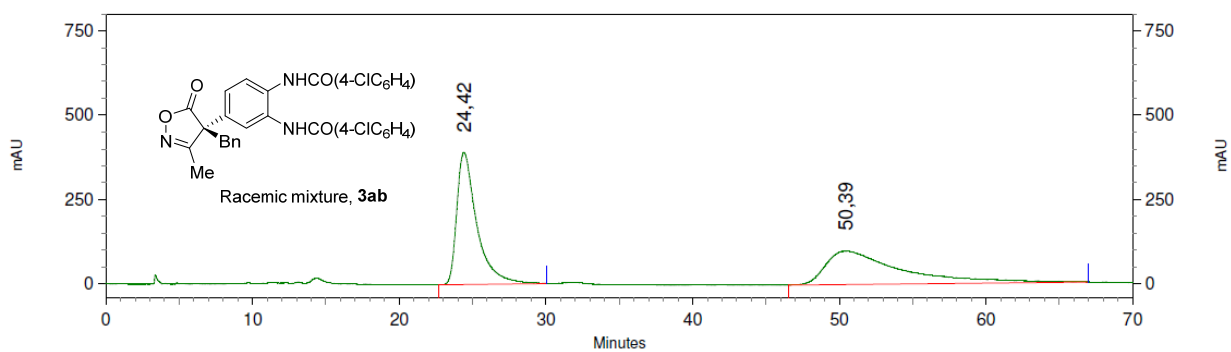

23: 220 nm, 4 nm

Results

| Retention Time | Area      | Area Percent |
|----------------|-----------|--------------|
| 24,42          | 149318466 | 51,492       |
| 50,39          | 140665267 | 48,508       |

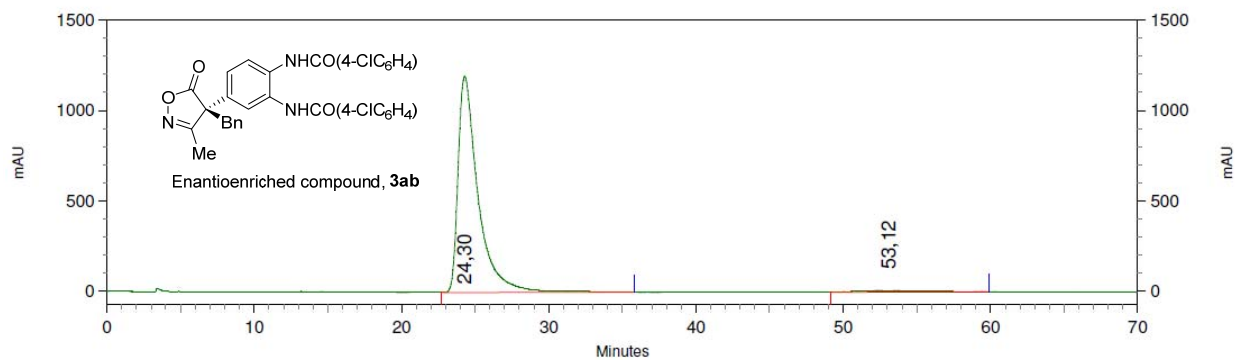

17: 220 nm, 4 nm

Results

| Retention Time | Area      | Area Percent |
|----------------|-----------|--------------|
| 24,30          | 456368688 | 97,654       |
| 53,12          | 10961900  | 2,346        |

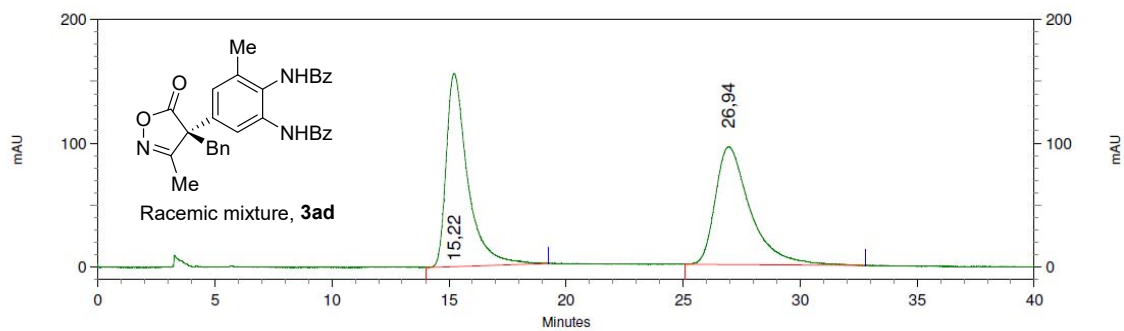

34: 250 nm, 4 nm

Results

| Retention Time | Area     | Area Percent |
|----------------|----------|--------------|
| 15,22          | 39814586 | 50,180       |
| 26,94          | 39528260 | 49,820       |

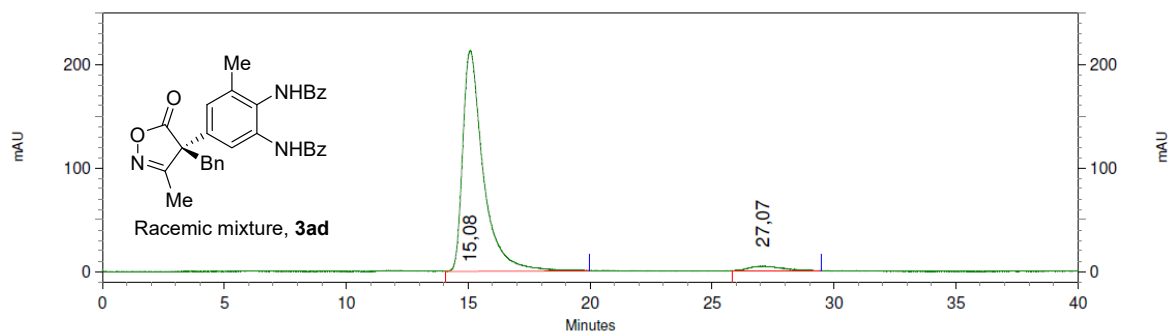

40: 290 nm, 4 nm

Results

| Retention Time | Area     | Area Percent |
|----------------|----------|--------------|
| 15,08          | 49876237 | 96,409       |
| 27,07          | 1857980  | 3,591        |

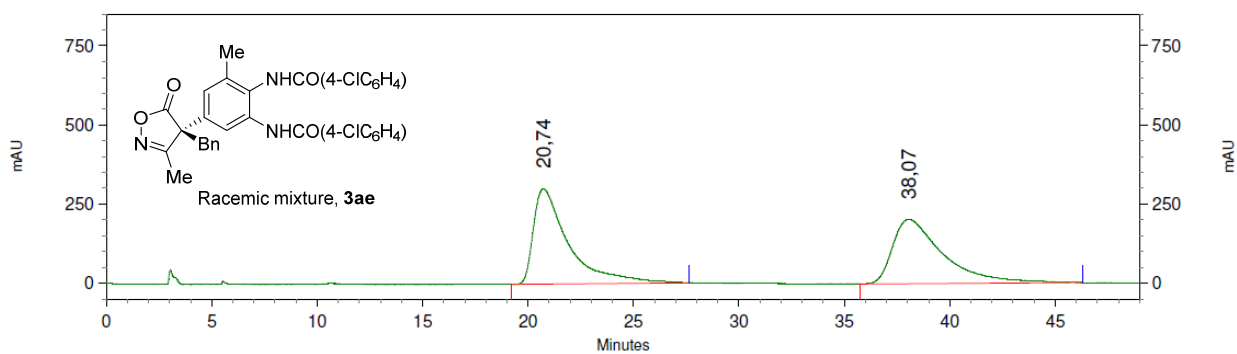

14: 245 nm, 4 nm  
Results

| Retention Time | Area      | Area Percent |
|----------------|-----------|--------------|
| 20,74          | 139491358 | 50,927       |
| 38,07          | 134412784 | 49,073       |

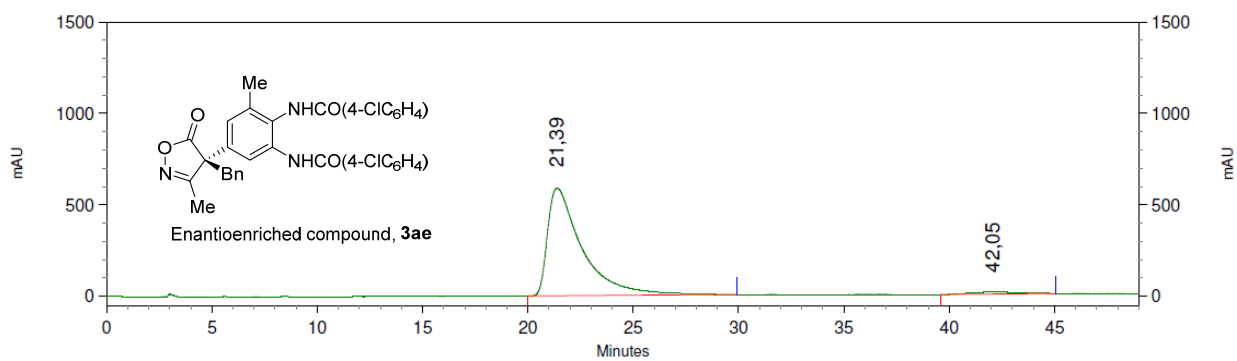

14: 245 nm, 4 nm  
Results

| Retention Time | Area      | Area Percent |
|----------------|-----------|--------------|
| 21,39          | 269250356 | 97,415       |
| 42,05          | 7145338   | 2,585        |

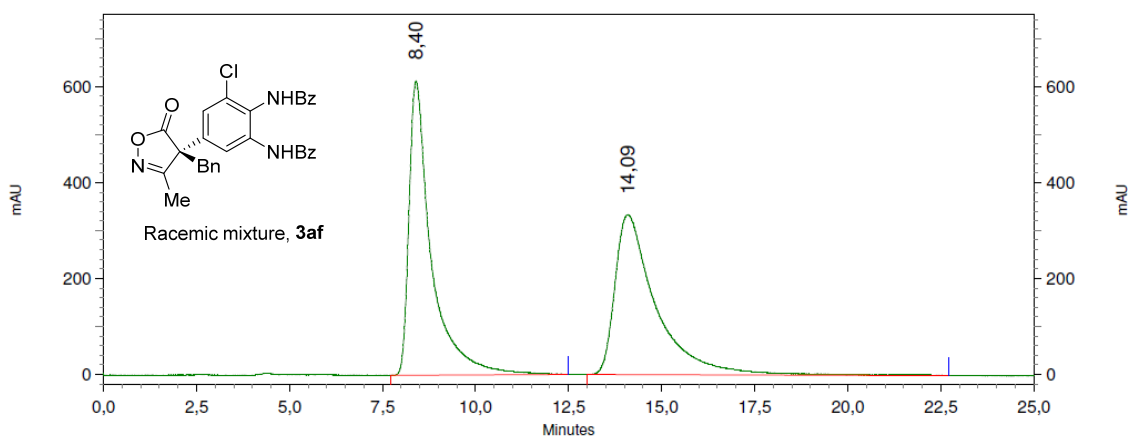

10: 250 nm, 4 nm

Results

| Retention Time | Area      | Area Percent |
|----------------|-----------|--------------|
| 8,40           | 102041483 | 49,850       |
| 14,09          | 102655688 | 50,150       |

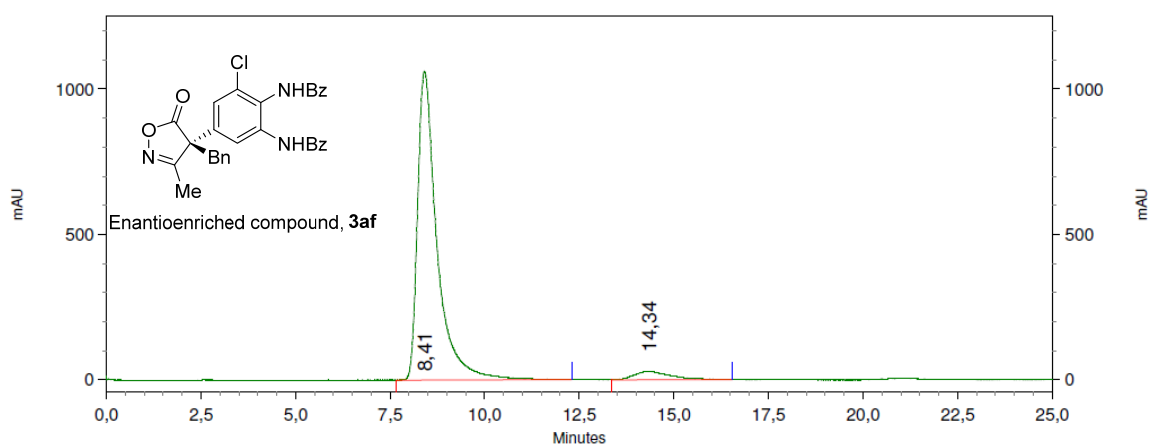

10: 250 nm, 4 nm

Results

| Retention Time | Area      | Area Percent |
|----------------|-----------|--------------|
| 8,41           | 151736132 | 95,177       |
| 14,34          | 7689047   | 4,823        |

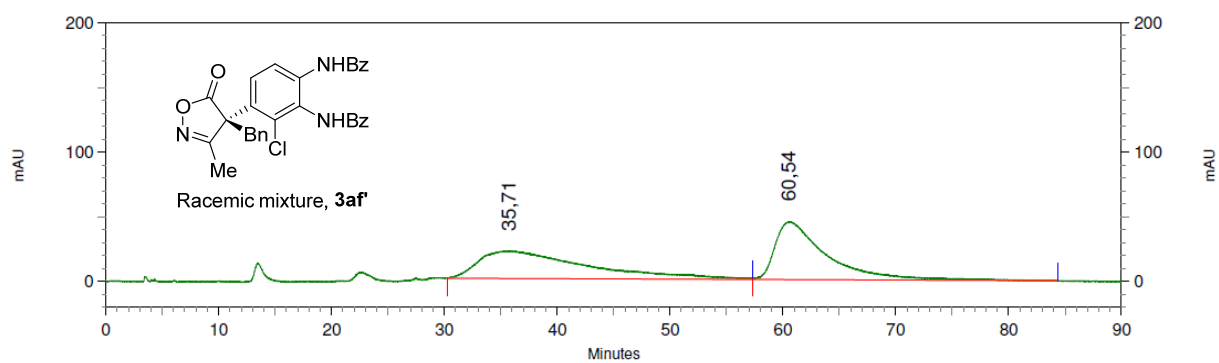

34: 250 nm, 4 nm

Results

| Retention Time | Area     | Area Percent |
|----------------|----------|--------------|
| 35,71          | 56649854 | 49,885       |
| 60,54          | 56910792 | 50,115       |

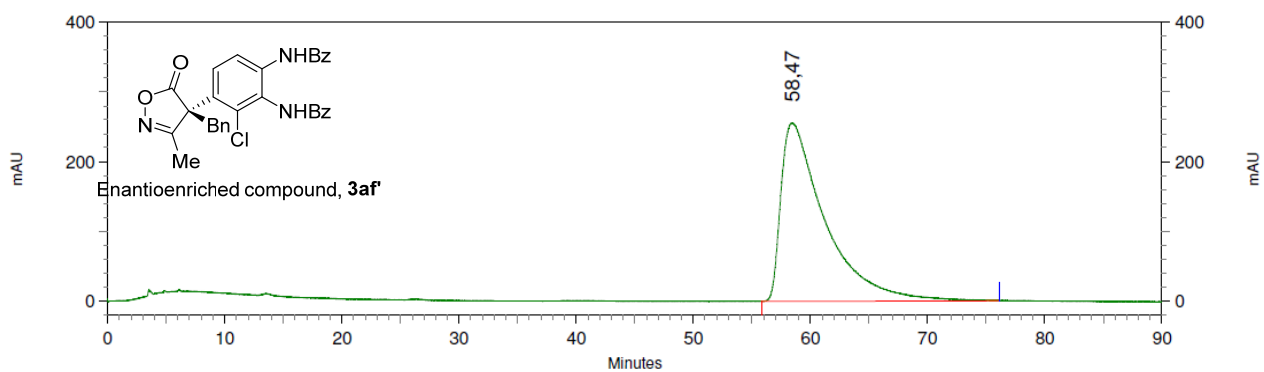

34: 250 nm, 4 nm

Results

| Retention Time | Area      | Area Percent |
|----------------|-----------|--------------|
| 58,47          | 267720471 | 100,000      |

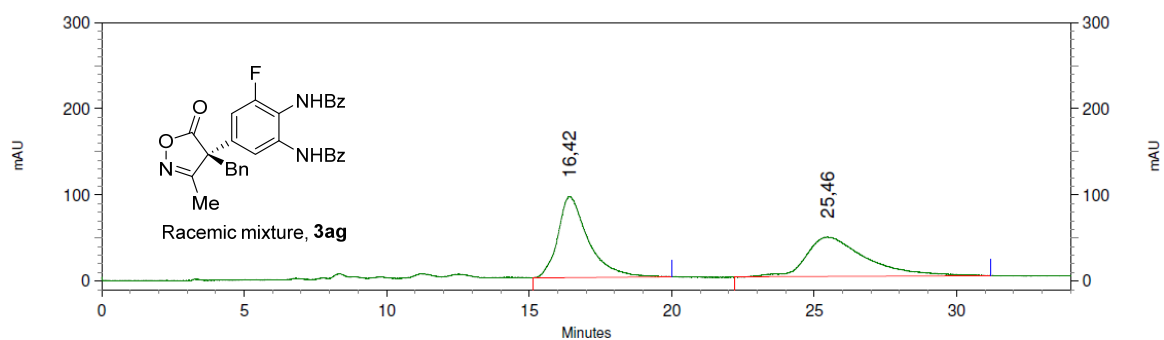

34: 250 nm, 4 nm

Results

| Retention Time | Area     | Area Percent |
|----------------|----------|--------------|
| 16,42          | 27947589 | 51,120       |
| 25,46          | 26722443 | 48,880       |

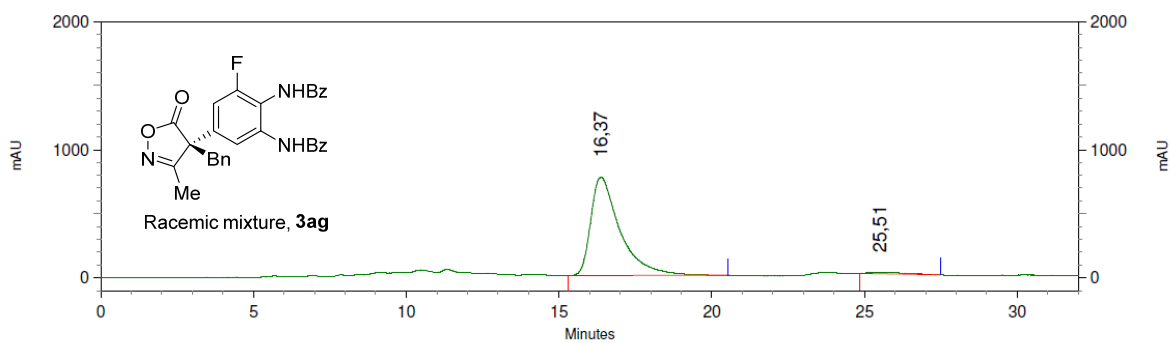

31: 250 nm, 4 nm

Results

| Retention Time | Area      | Area Percent |
|----------------|-----------|--------------|
| 16,37          | 204935692 | 98,232       |
| 25,51          | 3687584   | 1,768        |

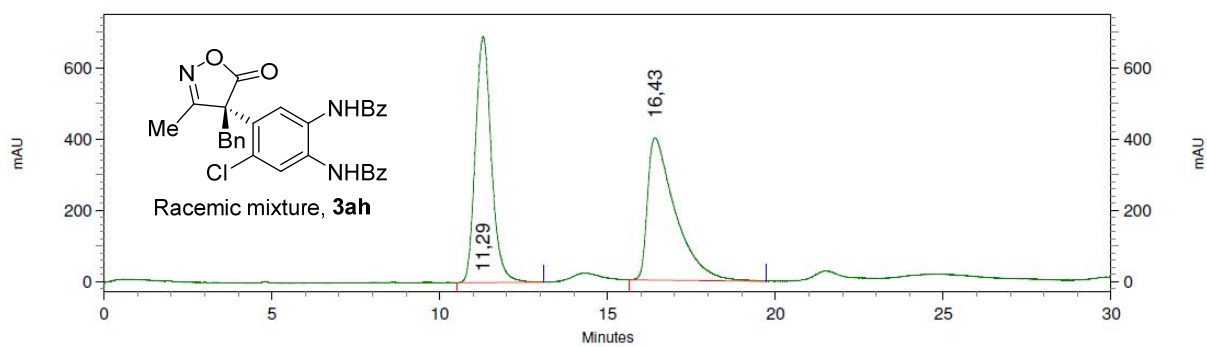

8: 250 nm, 4 nm Results

| Retention Time | Area     | Area Percent |
|----------------|----------|--------------|
| 11,29          | 91820114 | 49,970       |
| 16,43          | 91929849 | 50,030       |

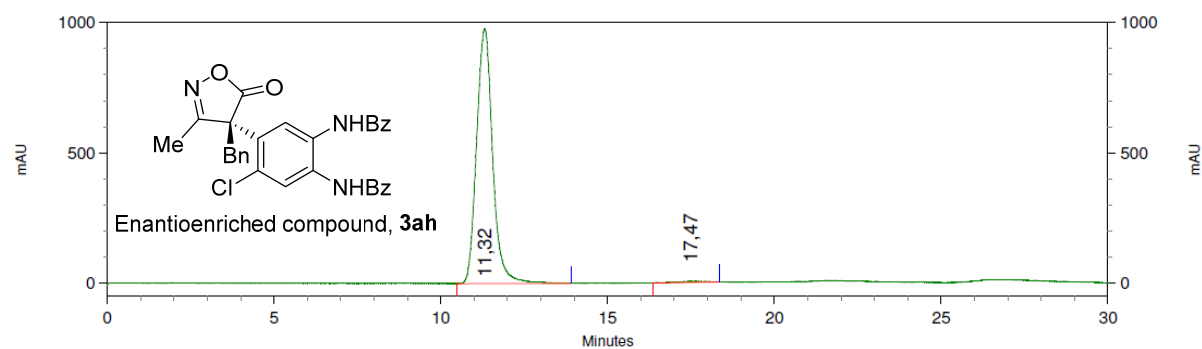

8: 250 nm, 4 nm Results

| Retention Time | Area      | Area Percent |
|----------------|-----------|--------------|
| 11,32          | 131154393 | 99,129       |
| 17,47          | 1152837   | 0,871        |

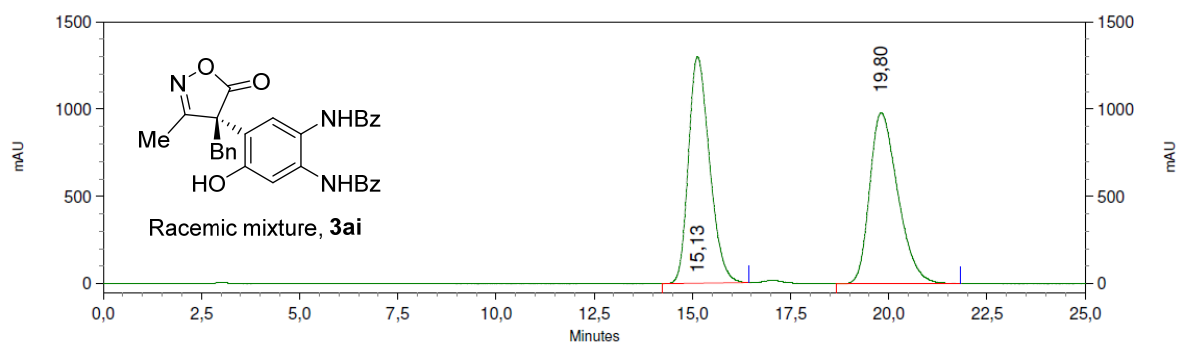

6: 230 nm, 4 nm Results

| Retention Time | Area      | Area Percent |
|----------------|-----------|--------------|
| 15,13          | 193931848 | 49,863       |
| 19,80          | 194994879 | 50,137       |

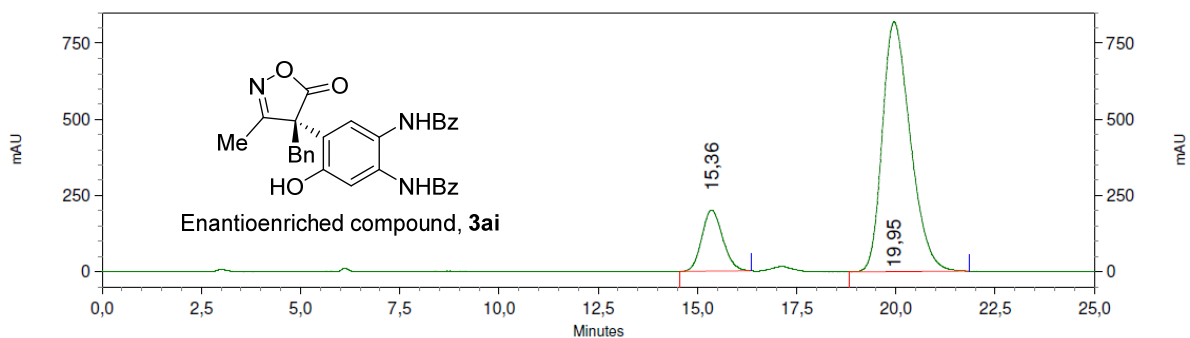

6: 230 nm, 4 nm Results

| Retention Time | Area      | Area Percent |
|----------------|-----------|--------------|
| 15,36          | 29322456  | 15,403       |
| 19,95          | 161041216 | 84,597       |



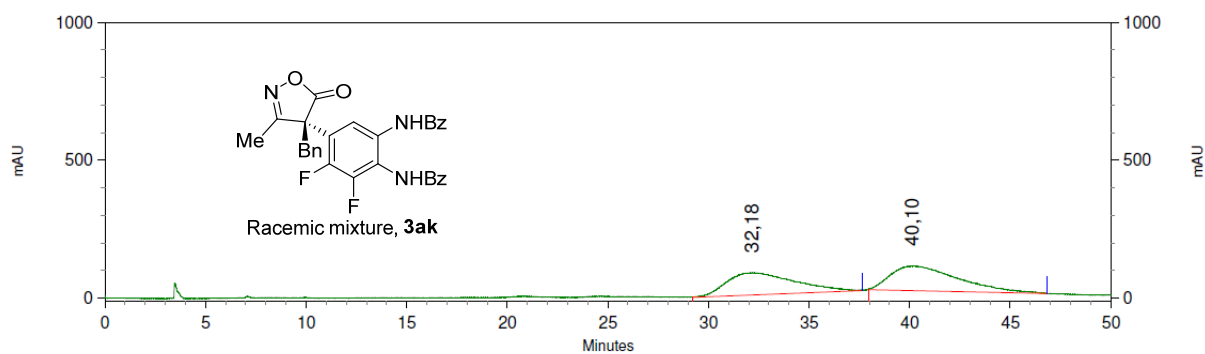

31: 209 nm, 4 nm

Results

| Retention Time | Area     | Area Percent |
|----------------|----------|--------------|
| 32,18          | 74894989 | 47,233       |
| 40,10          | 83668450 | 52,767       |

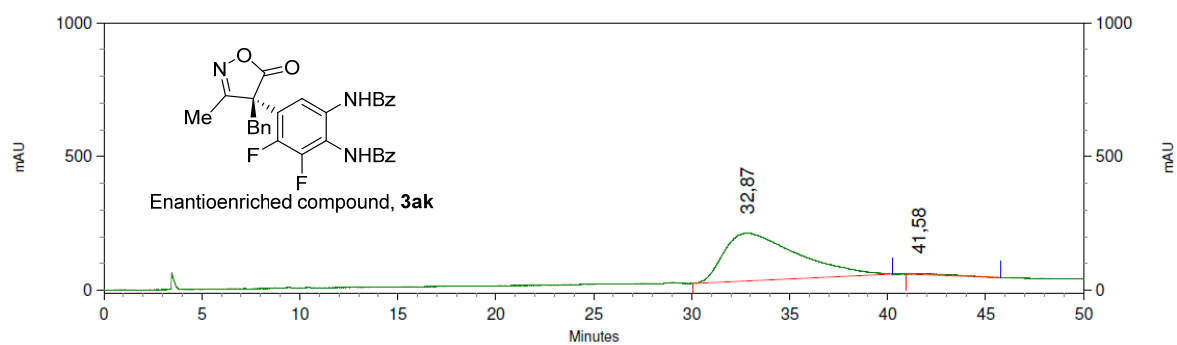

31: 209 nm, 4 nm

Results

| Retention Time | Area      | Area Percent |
|----------------|-----------|--------------|
| 32,87          | 185520717 | 98,600       |
| 41,58          | 2634328   | 1,400        |

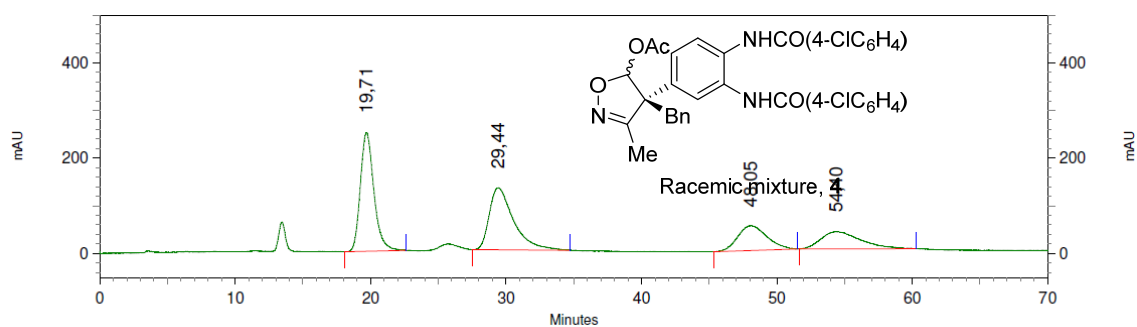

12: 248 nm, 4 nm

Results

| Retention Time | Area     | Area Percent |
|----------------|----------|--------------|
| 19,71          | 69702963 | 35,573       |
| 29,44          | 65140759 | 33,244       |
| 48,05          | 31280648 | 15,964       |
| 54,40          | 29820377 | 15,219       |

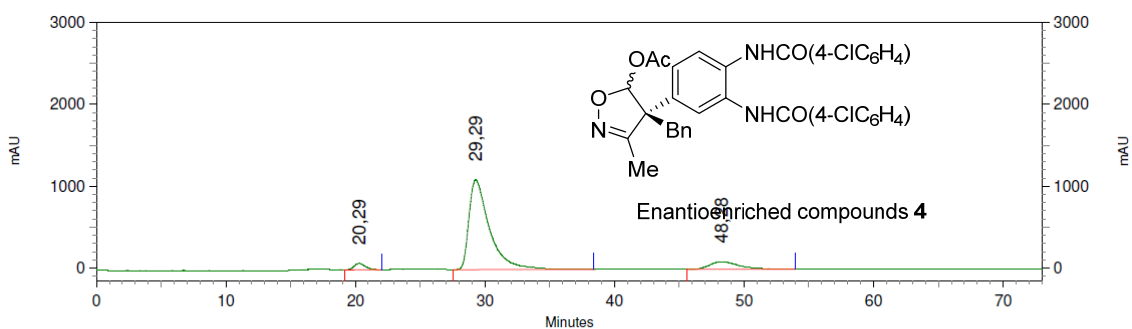

12: 248 nm, 4 nm

Results

| Retention Time | Area      | Area Percent |
|----------------|-----------|--------------|
| 20,29          | 18956358  | 3,379        |
| 29,29          | 483909310 | 86,265       |
| 48,28          | 58093035  | 10,356       |

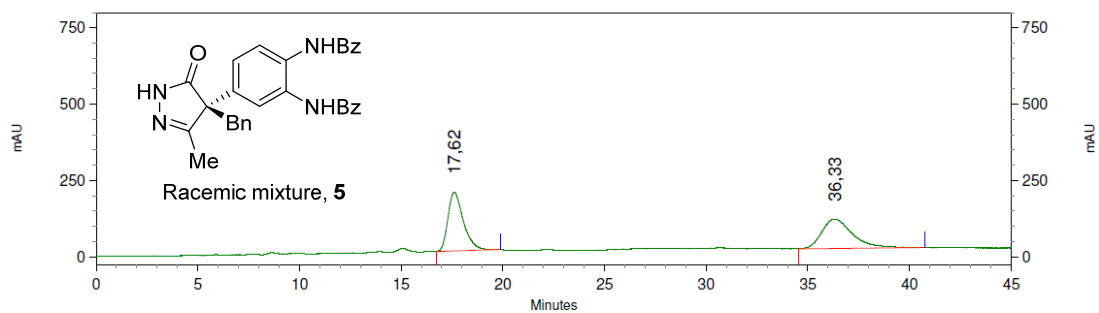

30: 266 nm, 4 nm

Results

| Retention Time | Area     | Area Percent |
|----------------|----------|--------------|
| 17,62          | 40520209 | 49,814       |
| 36,33          | 40822821 | 50,186       |

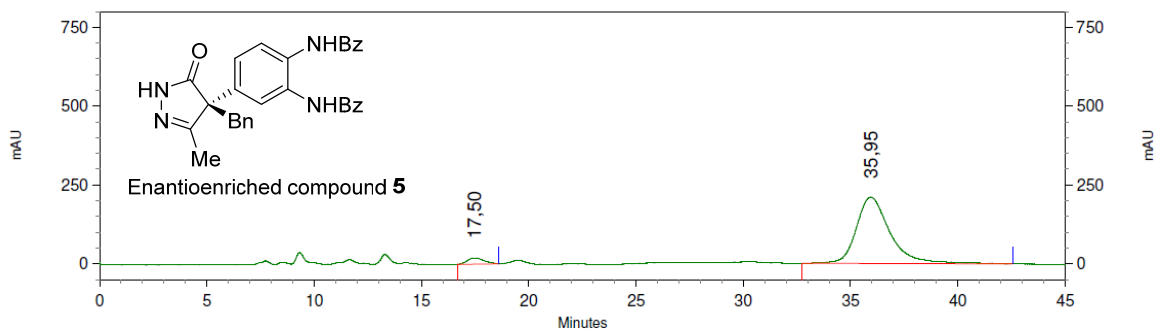

30: 266 nm, 4 nm

Results

| Retention Time | Area     | Area Percent |
|----------------|----------|--------------|
| 17,50          | 4105407  | 4,257        |
| 35,95          | 92342778 | 95,743       |

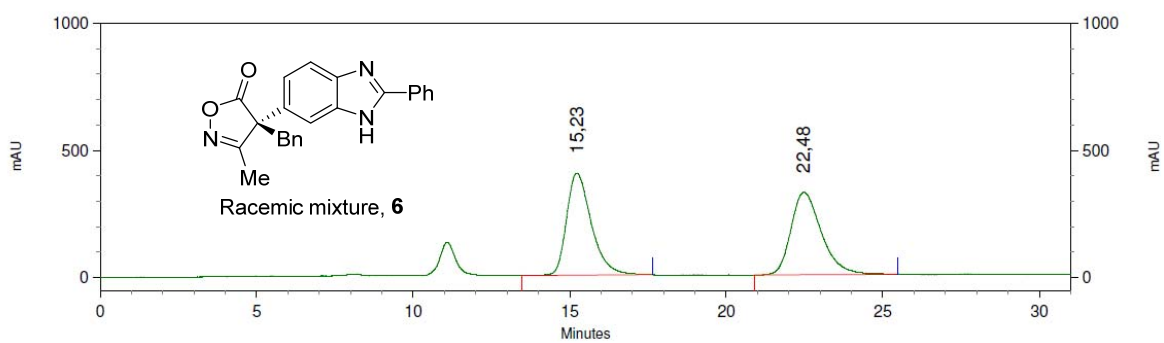

35: 306 nm, 4 nm  
Results

| Retention Time | Area     | Area Percent |
|----------------|----------|--------------|
| 15,23          | 88266750 | 50,173       |
| 22,48          | 87658124 | 49,827       |

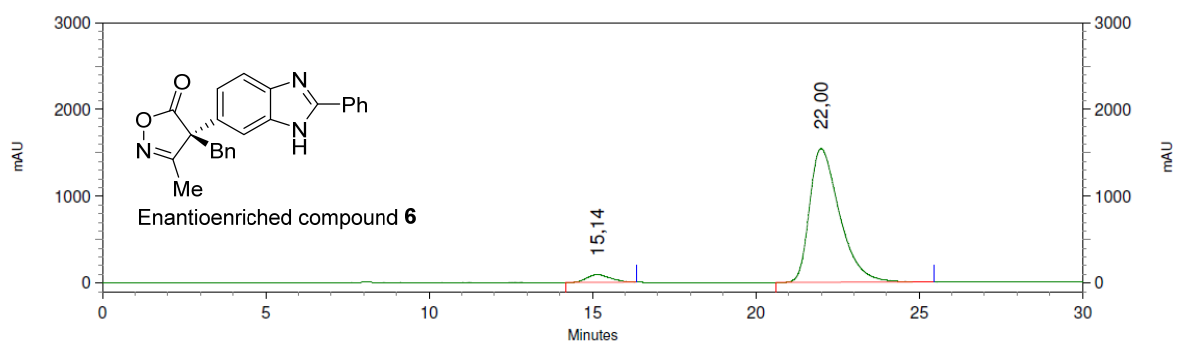

35: 306 nm, 4 nm  
Results

| Retention Time | Area      | Area Percent |
|----------------|-----------|--------------|
| 15,14          | 17990991  | 4,359        |
| 22,00          | 394742947 | 95,641       |

## Determination of the relative stereochemistry of compounds 4

The relative stereochemistry of lactols 4 was determined by NOESY experiments. Major diastereoisomer showed interaction between the CH<sub>2</sub> of the Bn group (3.23 and 3.50 ppm) and lactol CH at 6.57 ppm

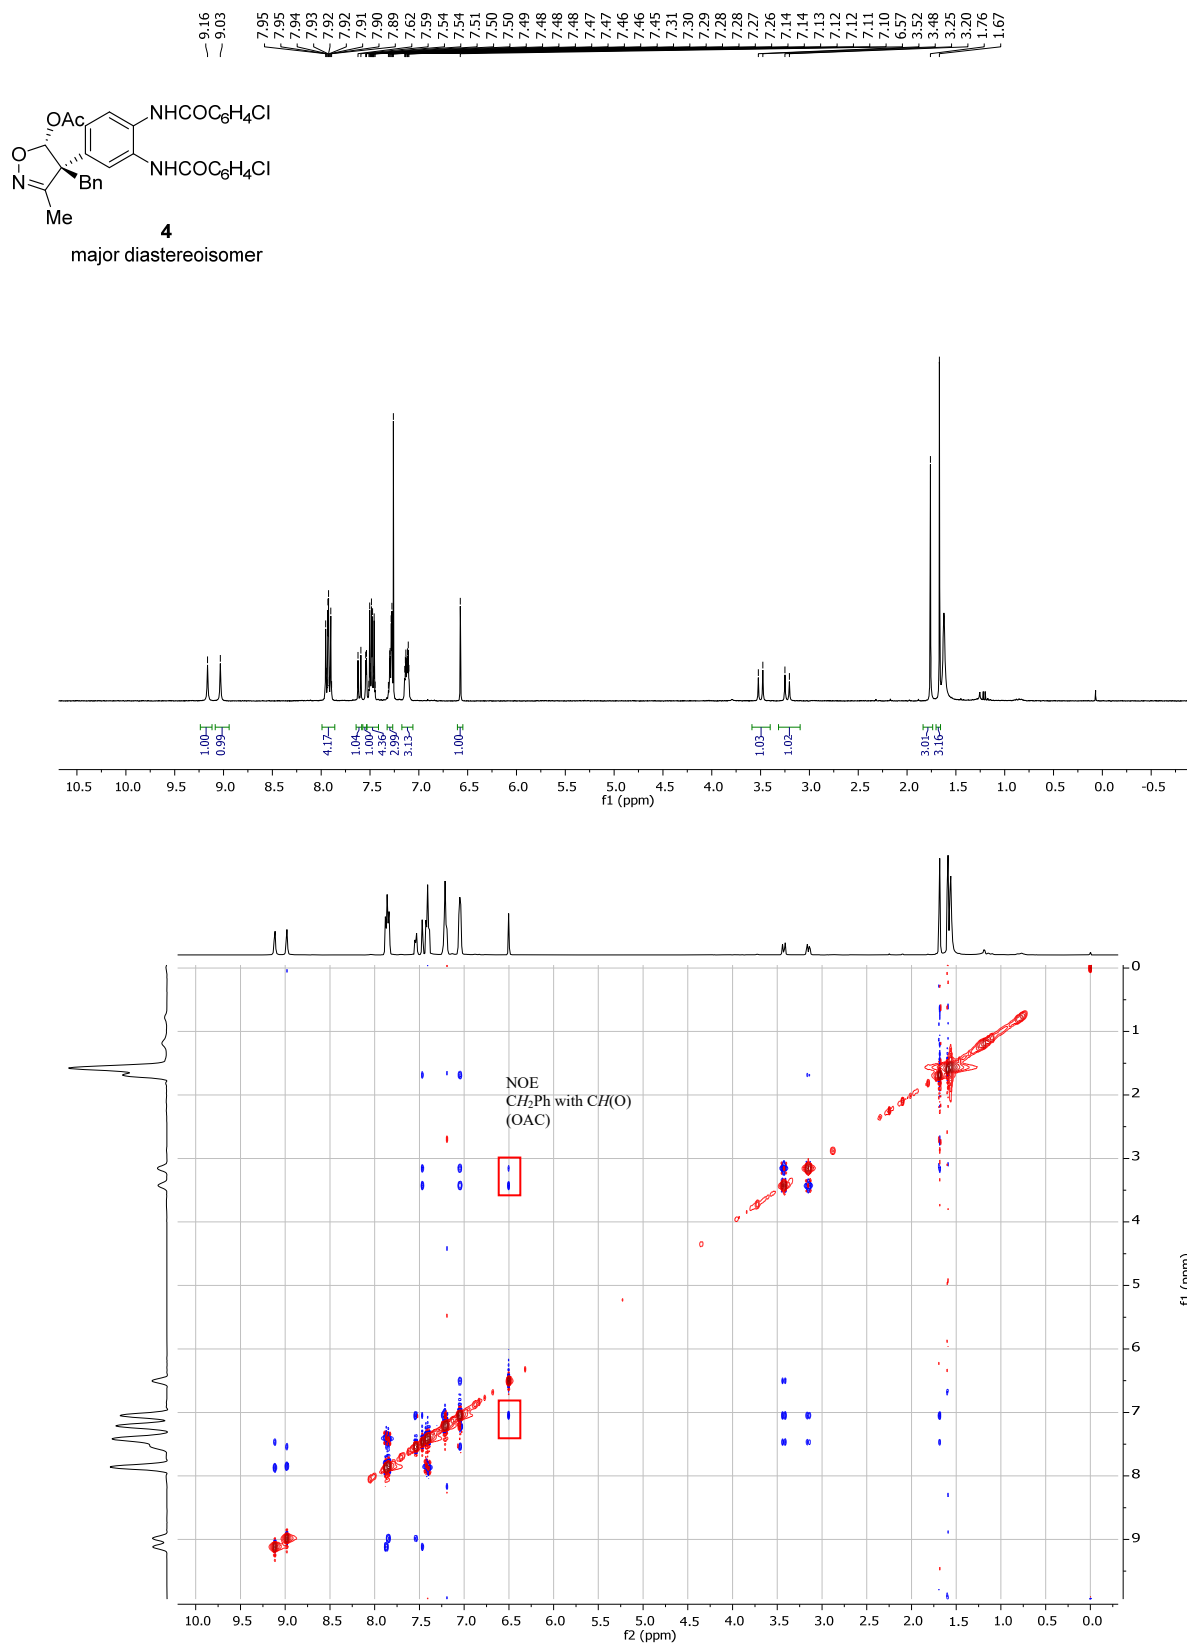

On the other hand the minor diastereoisomer showed interaction between the CH<sub>2</sub> of the Bn group (3.47 and 3.70 ppm) and the methyl group of the acetate at 1.96 ppm.

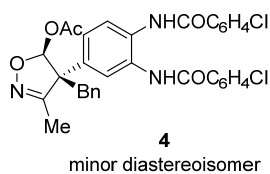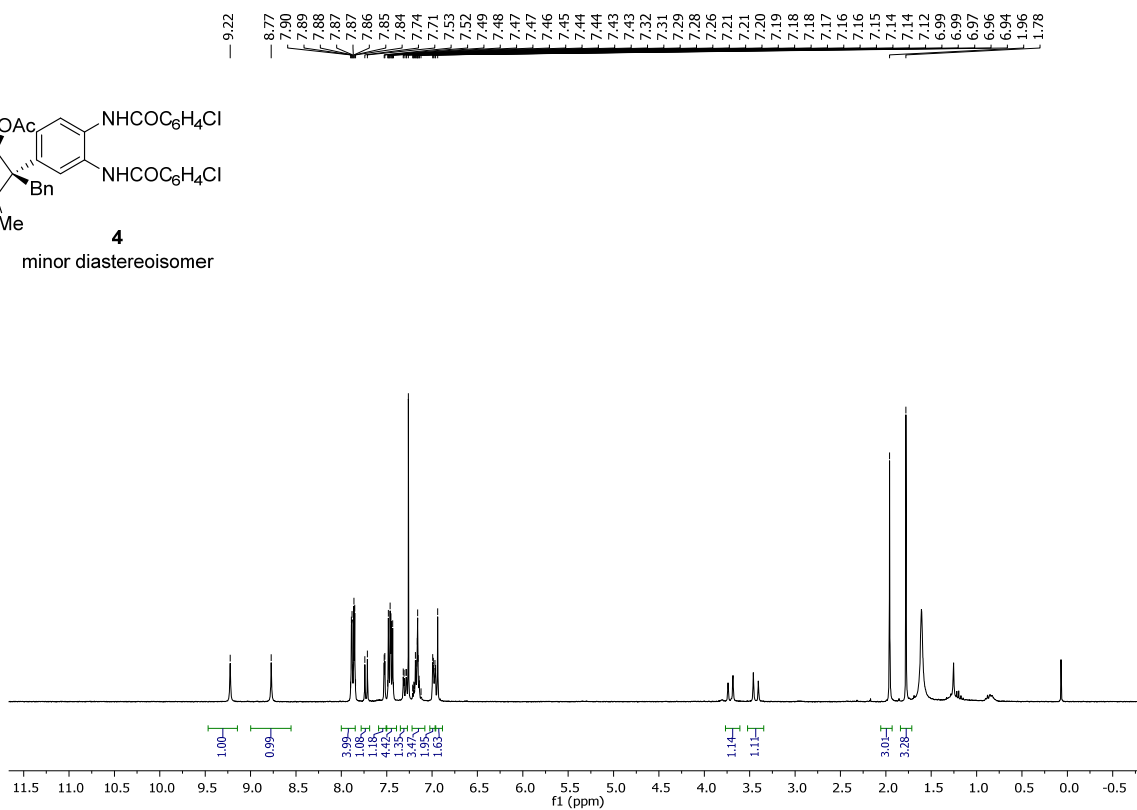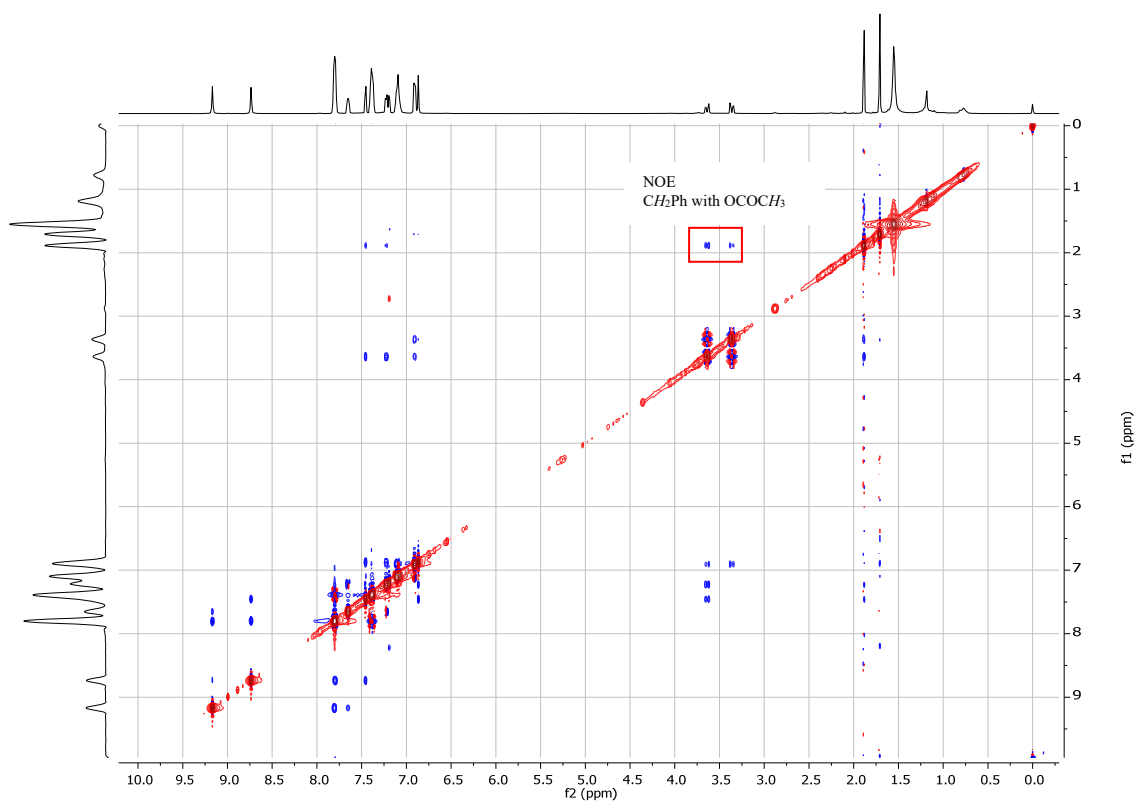

**X-Ray structure of compound 3ha. CCDC 2292242**

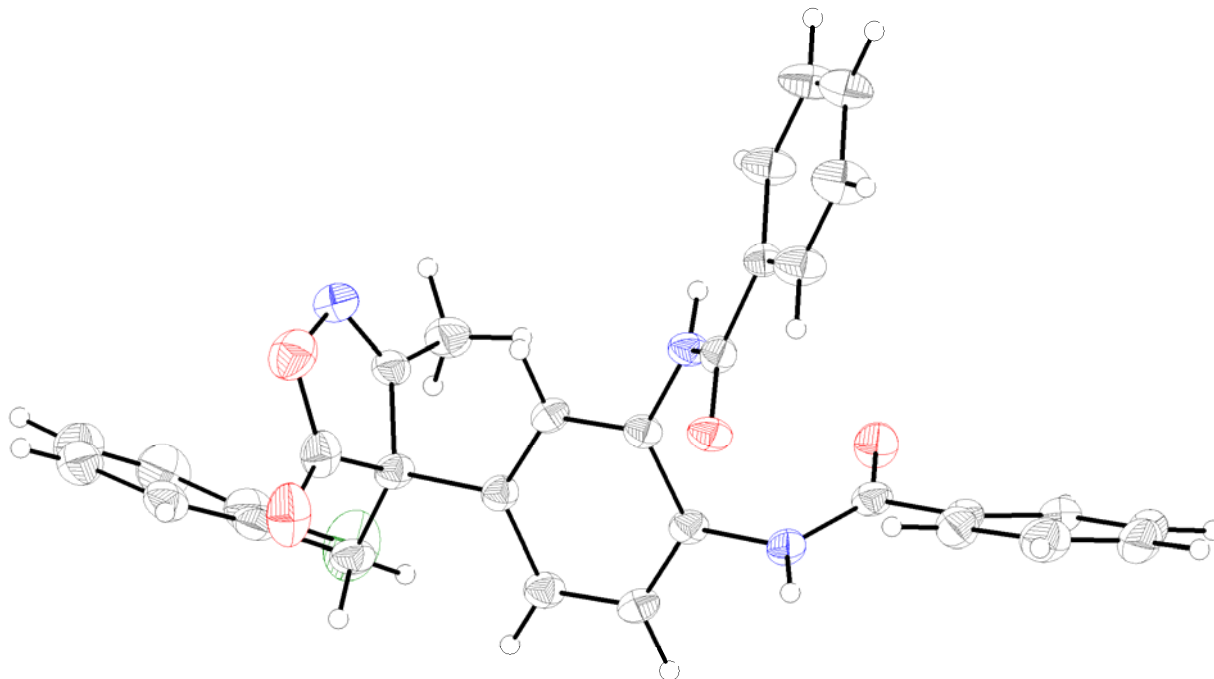

**Figure S1.** Ortep plot for compound **3ha**. Ellipsoids drawn at 50% probability level. Flack parameter 0.042(10).

### Structural determination of compounds **3ad-3ag**.

The structural determination of compounds **3ad-3ag** (regiochemistry) was carried out by analyzing the coupling constants ( $J$ ) of the two aromatic hydrogens within the tetrasubstituted aryl ring.

In the NMR spectrum of compound **3ad**, signals corresponding to these protons were overlapped with those of the aromatic hydrogens of the three other aromatic rings. Consequently, the structural assignment of **3ad** was made based on its similarity to compound **3ae**, which exhibited a singlet signal at  $\delta$  7.53 (1H) and an unresolved doublet at  $\delta$  7.30 (1H) consistent with a 1,2,3,5-tetrasubstituted ring.

The differentiation between the structures of regioisomers **3af** and **3'af** followed a similar approach. The major regioisomer **3af** displayed two signals at 7.74 (1H, d,  $J = 3.0$  Hz) and 7.65 (1H, d,  $J = 3.0$  Hz) ppm, with a *meta* coupling value, indicating a 1,2,3,5-tetrasubstituted aryl ring. Conversely, the minor regioisomer **3'af** exhibited two doublets at 8.09 (1H, d,  $J = 9.0$  Hz, Ar) and 7.94 (1H, d,  $J = 9.0$  Hz, Ar) confirming the *ortho* disposition of both hydrogens, in line with a 1,2,3,4-tetrasubstituted aryl ring.

Finally, the fluorinated compound **3ag** displayed a partially resolved double doublet at 7.86 (1H) with  $J_{H-F} = 1.8$  Hz (*para* H-F coupling) and  $J_{H-H} = 2.0$  Hz (*meta* H-H coupling) along with a double doublet at 6.91 (1H) with  $J_{H-F} = 10.7$  Hz (*ortho* H-F coupling) and  $J_{H-H} = 2.2$  Hz (*meta* H-H coupling). These findings indicated the *meta* disposition of both hydrogens in a 1,2,3,5-tetrasubstituted aryl ring featuring a fluorine atom at position 3.

### References

- [1] a) N. Capreti, I. D. Jurberg *Org. Lett.* 2015, **17**, 2490-2493; b) A. A. G. Fernandes, M. L. Stivanin, I. D. Jurberg *Chem. Select.* 2019, **4**, 3360. c) H. Zhang, B. Wang, L. Cui, X. Bao, J. Qu, Y. Song, *Eur. J. Org. Chem.* 2015, 2143; d) R. Torán, C. Vila, A. Sanz-Marco, M. C. Muñoz, J. R. Pedro, G. Blay, *Eur. J. Org. Chem.* 2020, 627.
- [2] A. Lavios, P. Martinez-Pardo, A. Sanz-Marco, C. Vila, Jose R. Pedro, G. Blay, *Org. Lett.* 2023, **25**, 5608.
